# Supplementary material for: Influence of prior comorbidities and chronic medications use on the risk of COVID-19 in adults: a population-based cohort study in Tarragona, Spain
Source: PubMed Central journal article supplement — BMJ Open. 2020 Dec 10;10(12):e041577. doi: 10.1136/bmjopen-2020-041577 (PMC7733229; doi:10.1136/bmjopen-2020-041577), 2020-12-10
Supplement: bmjopen-2020-041577.draft_revisions.pdf [file bmjopen-2020-041577.draft_revisions.pdf]

# BMJ Open

BMJ Open is committed to open peer review. As part of this commitment we make the peer review history of every article we publish publicly available.

When an article is published we post the peer reviewers' comments and the authors' responses online. We also post the versions of the paper that were used during peer review. These are the versions that the peer review comments apply to.

The versions of the paper that follow are the versions that were submitted during the peer review process. They are not the versions of record or the final published versions. They should not be cited or distributed as the published version of this manuscript.

BMJ Open is an open access journal and the full, final, typeset and author-corrected version of record of the manuscript is available on our site with no access controls, subscription charges or pay-per-view fees (<http://bmjopen.bmj.com>).

If you have any questions on BMJ Open's open peer review process please email [info.bmjopen@bmj.com](mailto:info.bmjopen@bmj.com)

# BMJ Open

## Influence of prior comorbidities and chronic medications use on the risk of COVID19 in adults: a population based cohort study in Tarragona, Spain

|                               |                                                                                                                                                                                                                                                                                                                                                                                                                                                                                                                                                                                                                                                                                                                                                                                                                                                                                                                                                                                                                                                                                                                                                                                                                                           |
|-------------------------------|-------------------------------------------------------------------------------------------------------------------------------------------------------------------------------------------------------------------------------------------------------------------------------------------------------------------------------------------------------------------------------------------------------------------------------------------------------------------------------------------------------------------------------------------------------------------------------------------------------------------------------------------------------------------------------------------------------------------------------------------------------------------------------------------------------------------------------------------------------------------------------------------------------------------------------------------------------------------------------------------------------------------------------------------------------------------------------------------------------------------------------------------------------------------------------------------------------------------------------------------|
| Journal:                      | <i>BMJ Open</i>                                                                                                                                                                                                                                                                                                                                                                                                                                                                                                                                                                                                                                                                                                                                                                                                                                                                                                                                                                                                                                                                                                                                                                                                                           |
| Manuscript ID                 | bmjopen-2020-041577                                                                                                                                                                                                                                                                                                                                                                                                                                                                                                                                                                                                                                                                                                                                                                                                                                                                                                                                                                                                                                                                                                                                                                                                                       |
| Article Type:                 | Original research                                                                                                                                                                                                                                                                                                                                                                                                                                                                                                                                                                                                                                                                                                                                                                                                                                                                                                                                                                                                                                                                                                                                                                                                                         |
| Date Submitted by the Author: | 16-Jun-2020                                                                                                                                                                                                                                                                                                                                                                                                                                                                                                                                                                                                                                                                                                                                                                                                                                                                                                                                                                                                                                                                                                                                                                                                                               |
| Complete List of Authors:     | Vila-Córcoles, Angel; Institut Catala De La Salut, Primary Healthcare Service Camp de Tarragona; IDIAP Jordi Gol, Unitat de Suport a la recerca Camp de Tarragona-Reus<br>Ochoa-Gondar, Olga; Institut Catala De La Salut, Primary Healthcare Service Camp de Tarragona; IDIAP Jordi Gol, Unitat de suport a la recerca Camp de Tarragona-Reus<br>Satué, EVA; Institut Catala De La Salut, Primary Healthcare Service Camp de Tarragona; IDIAP Jordi Gol, Unitat de suport a la recerca Camp de Tarragona-Reus<br>Torrente-Fraga, Cristina; Institut Catala De La Salut, Information and Communication Technologies<br>Gomez-Bertomeu, Frederic; Institut Catala De La Salut, Department of Microbiology. Hospital Universtari Joan XXIII<br>Vila-Rovira, Angel; IDIAP Jordi Gol, Unitat de suport a la recerca Camp de Tarragona-Reus<br>Hospital-Guardiola, Immaculada; Institut Catala De La Salut, Primary Healthcare Service Camp de Tarragona<br>de Diego-Cabanes, Cinta; Institut Catala De La Salut, Primary Healthcare Service Camp de Tarragona<br>Bejarano, Ferran; Institut Catala De La Salut, Department of Pharmacology. Primary Healthcare Service Camp de Tarragona<br>Basora-Gallisà, Josep; IDIAP Jordi Gol, Direction |
| Keywords:                     | EPIDEMIOLOGY, Epidemiology < INFECTIOUS DISEASES, PRIMARY CARE, Public health < INFECTIOUS DISEASES                                                                                                                                                                                                                                                                                                                                                                                                                                                                                                                                                                                                                                                                                                                                                                                                                                                                                                                                                                                                                                                                                                                                       |
|                               |                                                                                                                                                                                                                                                                                                                                                                                                                                                                                                                                                                                                                                                                                                                                                                                                                                                                                                                                                                                                                                                                                                                                                                                                                                           |

SCHOLARONE™  
Manuscripts

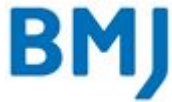

I, the Submitting Author has the right to grant and does grant on behalf of all authors of the Work (as defined in the below author licence), an exclusive licence and/or a non-exclusive licence for contributions from authors who are: i) UK Crown employees; ii) where BMJ has agreed a CC-BY licence shall apply, and/or iii) in accordance with the terms applicable for US Federal Government officers or employees acting as part of their official duties; on a worldwide, perpetual, irrevocable, royalty-free basis to BMJ Publishing Group Ltd ("BMJ") its licensees and where the relevant Journal is co-owned by BMJ to the co-owners of the Journal, to publish the Work in this journal and any other BMJ products and to exploit all rights, as set out in our [licence](#).

The Submitting Author accepts and understands that any supply made under these terms is made by BMJ to the Submitting Author unless you are acting as an employee on behalf of your employer or a postgraduate student of an affiliated institution which is paying any applicable article publishing charge ("APC") for Open Access articles. Where the Submitting Author wishes to make the Work available on an Open Access basis (and intends to pay the relevant APC), the terms of reuse of such Open Access shall be governed by a Creative Commons licence – details of these licences and which [Creative Commons](#) licence will apply to this Work are set out in our licence referred to above.

Other than as permitted in any relevant BMJ Author's Self Archiving Policies, I confirm this Work has not been accepted for publication elsewhere, is not being considered for publication elsewhere and does not duplicate material already published. I confirm all authors consent to publication of this Work and authorise the granting of this licence.

**TITLE PAGE**

**Title:** Influence of prior comorbidities and chronic medications use on the risk of COVID19 in adults: a population based cohort study in Tarragona, Spain.

**Author and Co-author's name**

- 1) Angel Vila-Corcoles,
- 2) Olga Ochoa-Gondar,
- 3) Eva Satue-Gracia,
- 4) Cristina Torrente-Fraga,
- 5) Frederic Gomez-Bertomeu,
- 6) Angel Vila-Rovira,
- 7) Immaculada Hospital-Guardiola,
- 8) Cinta de Diego-Cabanes,
- 9) Ferran Bejarano-Romero
- 10) Josep Basora-Gallisa.

**Name, postal address, email, telephone, and fax numbers of the corresponding author.**

Name: Eva M<sup>a</sup> Satué Gracia

Postal address: C/ Rambla Nova, 124, Esc D, 1A, 43001, Tarragona (Spain)

Email: [esatue.tgn.ics@gencat.cat](mailto:esatue.tgn.ics@gencat.cat)

Telephone number. +0034977254021

Fax number: +0034977226411

**Full names, institutions, city, and country of all co-authors.**

1) FULL NAME: Angel Vila-Corcoles, MD ([avila.tgn.ics@gencat.cat](mailto:avila.tgn.ics@gencat.cat))

INSTITUTION 1: Primary Health Care Service Camp de Tarragona. Institut Catala de la Salut.

CITY: Tarragona

COUNTRY: Spain.

INSTITUTION 2: Unitat de Suport a la Recerca Camp de Tarragona-Reus. IDIAP Jordi Gol.

CITY: Barcelona

COUNTRY: Spain.

2) FULL NAME: Olga Ochoa-Gondar, MD ([oochoa.tgn.ics@gencat.cat](mailto:oochoa.tgn.ics@gencat.cat))

INSTITUTION 1: Primary Health Care Service Camp de Tarragona. Institut Catala de la Salut.

1  
2  
3 CITY: Tarragona

4 COUNTRY: Spain.

5 INSTITUTION 2: Unitat de Suport a la Recerca Camp de Tarragona-Reus. IDIAP Jordi Gol.

6 CITY: Barcelona

7 COUNTRY: Spain.

8  
9  
10 3) . Eva Satue-Gracia, MD ([esatue.tgn.ics@gencat.cat](mailto:esatue.tgn.ics@gencat.cat))

11 INSTITUTION 1: Primary Health Care Service Camp de Tarragona. Institut Catala de la Salut.

12 CITY: Tarragona

13 COUNTRY: Spain.

14 INSTITUTION 2: Unitat de Suport a la Recerca Camp de Tarragona-Reus. IDIAP Jordi Gol.

15 CITY: Barcelona

16 COUNTRY: Spain.

17  
18 4) FULL NAME: Cristina Torrente-Fraga, DM ([ctorrente.tgn.ics@gencat.cat](mailto:ctorrente.tgn.ics@gencat.cat))

19 INSTITUTION 1: Department of information and communication technologies. DAP Camp de  
20 Tarragona. Institut Catala de la Salut.

21 CITY: Tarragona

22 COUNTRY: Spain.

23  
24 5) FULL NAME: Frederic Gomez-Bertomeu, MD ([ffgomez.hj23.ics@gencat.cat](mailto:ffgomez.hj23.ics@gencat.cat))

25 INSTITUTION 1: Department of Microbiology. Hospital Universitari Joan XXIII. Institut Catala de  
26 la Salut.

27 CITY: Tarragona

28 COUNTRY: Spain.

29  
30 6) FULL NAME: Angel Vila-Rovira, DM ([vilapf@gmail.com](mailto:vilapf@gmail.com))

31 INSTITUTION 1: Unitat de Suport a la Recerca Camp de Tarragona-Reus. IDIAP Jordi Gol.

32 CITY: Barcelona

33 COUNTRY: Spain.

34  
35 7) FULL NAME: Immaculada Hospital-Guardiola, PhD ([ihospitalg.tgn.ics@gencat.cat](mailto:ihospitalg.tgn.ics@gencat.cat))

36 INSTITUTION 1: Primary Health Care Service Camp de Tarragona. Institut Catala de la Salut.

37 CITY: Tarragona

38 COUNTRY: Spain

39  
40 8) FULL NAME: Cinta de Diego-Cabanes, MD ([mcdiego.tgn.ics@gencat.cat](mailto:mcdiego.tgn.ics@gencat.cat))

41 INSTITUTION 1: Primary Health Care Service Camp de Tarragona. Institut Catala de la Salut.

42 CITY: Tarragona

43 COUNTRY: Spain  
44  
45  
46  
47  
48  
49  
50  
51  
52  
53  
54  
55  
56  
57  
58  
59  
60

1  
2  
3 9) FULL NAME: Ferran Bejarano-Romero, PhD ([fbejarano.tgn.ics@gencat.cat](mailto:fbejarano.tgn.ics@gencat.cat))  
4

5 INSTITUTION 1: Department of Pharmacology. DAP Camp de Tarragona. Institut Catala de la  
6 Salut.  
7

8 CITY: Tarragona

9 COUNTRY: Spain  
10

11 10) FULL NAME: Josep Basora-Gallisa, PhD ([jbasora@idiapjgol.org](mailto:jbasora@idiapjgol.org))  
12

13 INSTITUTION 1: Fundació Institut Universitari per a la recerca a l'Atenció Primària de Salut  
14 Jordi Gol i Gurina (IDIAPJGol)  
15

16 CITY: Barcelona

17  
18 COUNTRY: Spain.  
19

20 **KEYWORDS:** Coronavirus Infections, COVID19, Incidence, Risk, Disease Prevention  
21

22 **WORD COUNT:** 3,748 words (including abstract)  
23  
24

25 **Contributors:** AVC designed the study and wrote the manuscript; CTF and FGB obtained data;  
26 ESG, IHG and CDC assessed outcomes; OOG and AVR did statistical analyses; FBR revised  
27 pharmacological data; AVC and JBG coordinated the study.  
28  
29

30  
31 **Funding:** This study is supported by a grant from the Instituto de Salud Carlos III of the Spanish  
32 Health Ministry (file COV20/00852; call for the SARS-COV-2/COVID19 disease, RDL 8/2020,  
33 March 17, 2020). The funders had no role in study design, data collection and analysis,  
34 decision to publish, or preparation of the manuscript  
35  
36  
37  
38

39 **INTEREST CONFLICTS:** All authors, none declared.  
40  
41  
42  
43  
44  
45  
46  
47  
48  
49  
50  
51  
52  
53  
54  
55  
56  
57  
58  
59  
60

1  
2  
3 **Influence of prior comorbidities and chronic medications use on the risk of COVID19 in**  
4 **adults: a population based cohort study in Tarragona, Spain)**  
5

6 **ABSTRACT**  
7

8 OBJECTIVE: To investigate possible relationships between pre-existing medical conditions  
9 (including common comorbidities and chronic medications) and risk for suffering COVID19  
10 infection in middle-aged and older adults.  
11

12  
13 DESIGN: Population-based retrospective cohort study.  
14

15 SETTING: twelve primary care centres (PCCs) in Tarragona (Southern Catalonia, Spain).  
16

17 PARTICIPANTS: 79,083 people (77,676 community-dwelling and 1407 nursing-home  
18 residents), who were all individuals >50 years affiliated to the 12 participant PCCs.  
19

20 OUTCOMES: Baseline cohort characteristics (age, sex, vaccinations, comorbidities and chronic  
21 medications) were established at study start (01/03/2020) and primary outcome was PCR-  
22 confirmed COVID19 occurred among cohort members across 01/03/2020-23/05/2020. Risk for  
23 suffering COVID19 was evaluated by Cox regression, estimating multivariable hazard ratios  
24 (HRs) adjusted for age, sex, comorbidities and medications use.  
25  
26

27  
28 RESULTS: During study period, 380 PCR-confirmed COVID19 cases were observed, which  
29 means an incidence of 480.5 per 100,000 persons-period. Assessing the total study cohort only  
30 age/years (HR: 1.02; 95% CI: 1.01-1.03; p=0.002), nursing-home residence (HR: 21.83; 95%  
31 CI: 16.66-28.61; p<0.001) and receiving diuretics (HR: 1.35; 95% CI: 1.04-1.76; p=0.026)  
32 appeared independently associated with increased risk, whereas smoking (HR: 0.62; 95%CI:  
33 0.41-0.93; p=0.022) and receiving angiotensin receptor blockers(HR: 0.68; 95%CI: 0.47-0.99;  
34 p=0.046) and antihistamine (HR: 0.47; 95% CI: 0.22-1.01; p=0.052) were related with a reduced  
35 risk. Among community-dwelling individuals, pre-existing cancer (HR: 1.52; 95% CI: 1.03-2.24;  
36 p=0.035), chronic respiratory disease (HR: 1.82; 95% CI: 1.08-3.07; p=0.025) and cardiac  
37 disease (HR: 1.53; 95% CI: 1.06-2.19; p=0.021) emerged also associated with an increased risk  
38 for COVID19, WHEREAS receiving ACE-inhibitors (HR: 0.66; 95% CI: 0.44-0.99; p=0.046) and  
39 flu vaccination in prior autumn (HR: 0.63; 95% CI: 0.44-0.91; p=0.012) were associated with  
40 decreased risk.  
41  
42

43  
44 CONCLUSION: Age, nursing-home residence and multiple comorbidities appear predisposing  
45 for COVID19. Conversely, receiving angiotensin-receptor blockers/inhibitors, antihistamine and  
46 influenza vaccination could be protective, which should be closely investigated in further studies  
47 specifically focused on these concerns.  
48  
49

50  
51  
52  
53  
54  
55 KEYWORDS: Coronavirus Infections, COVID19, Incidence, Risk, Disease Prevention.  
56  
57  
58  
59  
60

### Strengths and limitations of this study (per article summary)

- This is a population-based cohort study including 79,083 adults >50 years (77,676 community-dwelling and 1407 nursing-home residents) in Tarragona (Southern Catalonia, Spain) who were retrospectively followed between 01/03/2020-23/05/2020.
- Relationships between PCR-confirmed COVID19 incidence and chronic comorbidities/medications were assessed by multivariable analysis methods, estimating risk ratios adjusted by age, sex and baseline underlying conditions.
- Main limitations are related with its observational nature and retrospective design.
- Despite the large size of study cohort, events were relatively few (n=380) which limits statistical power, especially in subgroup analyses.
- Data provides new arguments to explore possible preventive research lines.



## INTRODUCTION

At present, available population-based clinical data on the current coronavirus SARS-COV-2 pandemic (COVID19) is limited.<sup>1,2</sup> Most available clinical information is hospital-based data derived from severe cases(hospital/ICU admitted/deaths),<sup>2-8</sup> and there is few population- or community-based data involving a wide representative sample of the exposed population.<sup>2,6,9</sup> Many studies reported distribution of severe/fatal COVID19 cases according to clinical and demographical characteristics,<sup>3,4,5,7,8</sup> but there is lacking data assessing incidence and risk for suffering infection in relation with pre-existing clinical characteristics of the population (i.e, baseline risk profile according to previous underlying conditions/medications use). In fact, there is uncertainty about possible factors predisposing/protecting against COVID19 infection.

This study was aimed to analyse incidence and risk for suffering COVID19 in relation with pre-existing comorbidities and, especially, common chronic medications use among the general adult population over 50 years in Tarragona (Southern Catalonia, Spain) across the first 12-weeks pandemic period in the study area.

## METHODS

### Design, setting and study population

This is a population-based retrospective cohort study including 79,083 individuals affiliated to 12 participant primary care centres (PCCs) in the Tarragona area (an industrial-urban area in the Mediterranean coast of Southern Catalonia, Spain). Cohort members were all persons  $\geq 50$  years affiliated to any of the 12 PCCs managed by the Institut Català de la Salut in the study region (Tarragonès, Alt Camp and Conca Barberà counties), serving an assigned population of 210,672 all-age inhabitants, with the same reference Microbiological Laboratory Service (Hospital Joan XXIII) in Tarragona city. Cohort members were retrospectively followed since 01/03/2020 (the beginning of epidemic period in the region), until the occurrence of any study event (Covid19 diagnosis) or until the end of 12-weeks follow-up (23/05/2020). The study was approved by the ethical committee of the Institution (Ethics Committee IDIAP Jordi Gol, Barcelona, file 20/065-PCV) and was conducted according to the Helsinki Declaration and Spanish legislation on biomedical studies, data protection and respect for human rights.<sup>10</sup>

### Data sources

The pre-existing CAPAMIS Research Database, an institutional clinical research database previously used for other cohort studies in the study area,<sup>11</sup> was quickly updated for using as main data source in this COVID19 epidemiological investigation. Briefly, this research database compiles data from the institutional PCCs' clinical records system (working since the 2000s),

1  
2  
3 including administrative data and clinical information coded according to the International  
4 Classification of Diseases 10th Revision (ICD-10). It was used to identify sociodemographical  
5 characteristics, comorbidities, vaccinations history and active medications use among cohort  
6 members and to establish baseline characteristics of study population at study start  
7 (01/03/2020).  
8  
9

10 When COVID19 epidemic period started in the study area, two electronic alerts including  
11 COVID19's laboratory registries plus ICD-10 codes for COVID19 suspicion (B34.2: unspecified  
12 Coronavirus infection; B97.29: Other coronavirus as the cause of diseases classified elsewhere)  
13 were added to the electronic PCCs clinical records system and, later, both data sources were  
14 linked to construct an anonymized research database used for this report.  
15  
16  
17  
18  
19

## 20 **Outcomes**

21 Primary outcome was COVID-19 diagnosed by polymerase chain reaction (PCR) occurred  
22 among cohort members across the study period (from 01/03/2020 to 23/05/2020). For  
23 descriptive results we also report laboratory-excluded cases (PCR performed with a negative  
24 result) and presumptive COVID19 cases (persons coded as clinical suspicion alone without  
25 PCR tested). For laboratory diagnosis of COVID19 by RT-PCR, guidelines of the Health  
26 Department of the Generalitat de Catalunya were followed.<sup>12</sup> Briefly, from the samples collected  
27 by nasal and pharyngeal swab with transport medium for viruses and refrigerated at 4°C for a  
28 maximum of 48 hours, the RT-PCR technique Cobas® SARS-CoV-2 with CE-FDA marking was  
29 performed with a sensitivity and specificity close to 100%.<sup>13</sup> At the beginning of epidemic period,  
30 the availability for PCR testing was scarce, being prioritized for severe case patients admitted  
31 in the hospital and nursing-home residences (where several outbreaks occurred), whereas less  
32 PCR test were made among possible cases managed as outpatient.  
33  
34  
35  
36  
37  
38  
39  
40  
41

## 42 **Exposure**

43 Baseline use of common chronic medications, which could be hypothetically related with  
44 physiopathological mechanism of SARS-COV-2 infection or virulence (e.g., antihypertensive,  
45 antiplatelet/anticoagulant and/or anti-inflammatory drugs), were considered as main explanatory  
46 variables possibly related with the occurrence of COVID19 for the present study. It was  
47 determined by a review of the PHCCs' electronic clinical records system which contains  
48 specially designated fields for medications prescribed. Thus, active medication treatments in  
49 each cohort member on 01/03/2020, coded according to the Anatomical, Therapeutic, and  
50 Chemical classification system (ATC) of the World Health Organization,<sup>14</sup> were identified from  
51 the patient treatment plan registered in the PCC's clinical records system, and included the  
52 following therapeutic groups: antihypertensive (diuretics, beta-blockers, angiotensin converting  
53 enzyme inhibitors [ACEIs], angiotensin II receptor blockers [ARBs], calcium channel blockers),  
54 statins, anticoagulants (warfarin and new oral anticoagulant drugs), antiplatelet drugs,  
55  
56  
57  
58  
59  
60

1  
2  
3 antidiabetic drugs (insulin, oral antidiabetic drugs), inhaled respiratory drugs, antineoplastic  
4 agents, systemic corticosteroids, non-steroidal anti-inflammatory drugs (NSADs),  
5 chloroquine/hydroxychloroquine, antihistamines, proton-pump inhibitors and benzodiazepines  
6 (see Appendix).  
7  
8  
9

## 10 11 **Covariates**

12  
13 Besides age, sex, residence (community-dwelling/nursing-home), and vaccinations' history (flu  
14 vaccination in prior autumn or pneumococcal vaccination at any time), the following  
15 comorbidities/underlying conditions were considered according to data registered in the  
16 electronic PCCs clinical records on 01/03/2020: neurological disease (including dementia and  
17 stroke), cancer (solid organ or haematological neoplasia diagnosed in past 5 years), chronic  
18 renal failure, systemic Autoimmune Rheumatic Diseases (including rheumatoid arthritis and  
19 lupus), chronic respiratory disease (including chronic bronchitis/emphysema and/or asthma),  
20 chronic heart disease (including congestive heart failure, coronary artery disease and other  
21 cardiopathies), atrial fibrillation, chronic liver disease (including chronic hepatitis and cirrhosis),  
22 hypertension, diabetes mellitus, hypercholesterolemia, obesity and smoking (see Appendix).  
23  
24  
25  
26  
27  
28  
29

## 30 31 **Statistical analyses**

32 Incidence rates (IRs) for PCR-confirmed COVID19 were calculated per 100,000 person-period  
33 (12 weeks). Confidence intervals (CIs) for IRs were calculated assuming a Poisson distribution  
34 for uncommon events. In bivariate analyses, baseline characteristics according to suffer or not  
35 COVID19 were compared using Chi-squared or Fisher's test as appropriate.  
36  
37

38 Cox regression analyses were used to calculate unadjusted and multivariable-adjusted hazards  
39 ratios (HRs) and estimate the association between baseline exposure conditions and the time to  
40 the first outcome (PCR-confirmed COVID19 infection) during the study period.<sup>15</sup> The  
41 multivariable Cox models were made with all above mentioned exposure variables and co-  
42 variables (i.e. age, sex, residence, vaccinations history, comorbidities/underlying conditions and  
43 medications use). The method to select a subset of co-variables to include in the final model  
44 was the purposeful selection.<sup>15</sup> The final models include significant, confounders and all co-  
45 variables judged clinically or epidemiologically relevant. We performed a main analysis including  
46 the total study cohort (N=79,083) and two subgroup analyses restricted to community-dwelling  
47 individuals (N=77,676) and nursing-home residents (N=1407). Statistical significance was set at  
48  $p < 0.05$  (two-tailed). Data was performed by using IBM SPSS Statistics for Windows, version 24  
49 (IBM Corp., Armonk, N.Y., USA).  
50  
51  
52  
53  
54  
55  
56  
57  
58  
59  
60

## RESULTS:

Across the study period an amount of 2324 cohort members were PCR tested. Of them, 380 (16.4%) presented a positive result (PCR-confirmed COVID19) and 1944 (83.6%) presented a negative result. Additionally, 377 cohort members with presumptive COVID19 (clinical suspicion alone) were not PCR tested.

Of the 380 PCR-confirmed COVID19 cases, 158 (41.6%) occurred in men and 222 (58.4%) in women. By age groups, 101 (26.6%) occurred in people 50-64 years, 95 (25%) in 65-79 years and 184 (48.4%) in 80 years or older. By residence, 160 cases (42.1%) occurred in nursing-home residents and 220 (57.9%) in community-dwelling individuals. This means an overall IR of 480.5 PCR-confirmed COVID19 cases per 100,000 persons-period (236.6 in 50-64 yrs vs 365.2 in 65-79 yrs vs 1771.6 in 80 yrs or older; 419.9 in men vs 535.5 in women)

The most prevalent pre-existing comorbidities/underlying conditions among the 380 COVID19 patients were hypertension (58.7%), hypercholesterolemia (35%), chronic cardiac disease (32.4%), diabetes (26.8%) and obesity (25.3%).

By underlying conditions, maximum IRs (per 100,000 persons-period) emerged among those persons with neurological diseases (2848.5) followed by atrial fibrillation (1452.7), chronic renal failure (1094.7), chronic heart disease (915.5), chronic respiratory disease (866.3), diabetes (765.9), cancer (739.1) and hypertension (638.1). Lower IRs were observed among persons with rheumatic diseases (229.4) and smokers (211.8). According to pre-existing active medications, maximum IRs (per 100,000) appeared among those receiving diuretics (1308.8), insulin (1282.1), oral anticoagulants (1175.9) and inhaled-respiratory therapy (969.3) Table 1).

Table 2 shows unadjusted and multivariable adjusted analyses evaluating risk for suffering PCR-confirmed COVID19 in the total study cohort. In the unadjusted analysis, many underlying conditions and medications use were associated with an increased risk. However, after multivariable-adjustment, only age (HR: 1.02; 95% CI: 1.01-1.03; p=0.002), nursing-home residence (HR: 21.83; 95% CI: 16.66-28.61; p<0.001) and receiving diuretics (HR: 1.35; 95% CI: 1.04-1.76; p=0.026) appeared significantly associated with an increasing risk. Conversely, smoking (HR: 0.62; 95%CI: 0.41-0.93; p=0.022), receiving angiotensin II receptor blockers (HR: 0.68; 95%CI: 0.47-0.99; p=0.046) and antihistamines (HR: 0.47; 95% CI: 0.22-1.01; p=0.052) appeared associated with a reduced risk.

Among community-dwelling individuals (N=77,676), 1789 people were PCR tested. Of them, 1569 (87.7%) presented a negative result and 220 (12.3%) a positive result. Additionally, 358 people were codified as presumptive COVID19 cases (clinical suspicion without PCR performed). Table 3 shows distribution of PCR-confirmed COVID19 cases and specific-IRs by demographical characteristics, underlying conditions and medications use among community-dwelling individuals. In the multivariable analysis focused on these community-dwelling individuals, chronic respiratory disease (HR: 1.82; 95% CI: 1.08-3.07; p=0.025), cardiac disease

(HR: 1.53; 95% CI: 1.06-2.19; p=0.021) cancer (HR: 1.52; 95% CI: 1.03-2.24; p=0.035) receiving diuretics (HR: 1.54; 95% CI: 1.04-2.27; p=0.031) and insulin (HR: 1.79; 95% CI: 1.00-3.21; p=0.049) were associated with an increasing risk, whereas smoking (HR: 0.49; 95% CI: 0.30-0.80; p=0.004), receiving ACE-inhibitors (HR: 0.66; 95% CI: 0.44-0.99; p=0.046) and influenza vaccination in prior autumn (HR: 0.63; 95% CI: 0.44-0.91; p=0.012) were associated with a decreased risk (Table 4).

Among nursing-home residents (N=1407), where several outbreaks occurred, a total of 554 possible COVID19 cases were observed. Of them, 375 were excluded by a PCR negative result, 160 were confirmed by positive PCR and 19 were not PCR tested. Table 5 shows univariate and multivariate analysis on PCR-confirmed COVID19 cases in subgroup analysis restricted to nursing-home residents. In the multivariable analysis, increasing age and receiving antineoplastic agents were associated with an increasing risk, whereas receiving angiotensin II receptor blockers was associated with a decreased risk (HR: 0.45; 95% CI: 0.23-0.90; p=0.023).

## DISCUSSION

In the current context of COVID19 clinical uncertainties, there is not clear evidence about possible clinical predisposing or protecting factors related with SARS-COV-2 infection.

In the present study, the overall incidence rate of PCR-confirmed COVID19 (480.5 cases per 100,000 persons-period) may be considered intermediate as compared with other Spanish or European regions.<sup>1,16</sup> During study period, approximately 3% of cohort members were PCR tested (with 380 positive and 1944 negative result). Assuming this data, and considering that PCR test were scarcely available in the study area for patients with less severe symptoms during the first weeks of the epidemic period, the true incidence of COVID19 was logically underestimated. Nevertheless, considering the relatively low number of presumptive cases (clinical suspicion alone without PCR performed), our data also suggests that the overall number of infected population (definitive plus presumptive) may be considerably lower than speculated.<sup>16</sup>

Specific-IRs by comorbidities and medications use largely reflect the excess baseline-risk profile related with the great number of cases observed among elderly persons and, especially, nursing-home residents (where several outbreaks occurred and supported approximately forty percent of overall COVID19 cases).

Considering sociodemographical variables, apart of nursing-home residence that increased more than twenty-times the adjusted-risk for PCR-confirmed COVID19, we found that age increased approximately a 2% for each year the adjusted-risk for suffering COVID19 infection. Despite COVID19 was more frequent in women, sex did not alter significantly the risk of infection in multivariable analysis.

1  
2  
3 None comorbidity appeared independently associated with a significant increased risk for PCR-  
4 confirmed COVID19 in the multivariable analysis evaluating the total study population.  
5  
6 Nevertheless, pre-existing cancer, chronic respiratory disease and cardiac disease emerged  
7 significantly associated with an increased risk in subgroup analysis focused on community-  
8 dwelling individuals. Hypertension, diabetes and/or obesity did not emerge independently  
9 associated with a significant increasing risk for suffering COVID19 in our adjusted analyses.  
10  
11 There is general consensus considering these conditions as major risk conditions related with  
12 poor prognosis in hospitalised COVID19 patients,<sup>7,8,16-20</sup> but there is lacking data assessing the  
13 role of these conditions to predispose for suffering infection.<sup>2,16</sup>  
14  
15

16 Surprisingly, smoking was associated with a statistically significant decreased risk for suffering  
17 COVID19 in both multivariable analyses assessing the total study cohort and the subgroup of  
18 community-dwelling individuals. This surprising data is not unique<sup>21</sup> and merits further  
19 investigations. Opposite findings about poor prognosis among smokers with COVID19 have  
20 been reported.<sup>2,4,16,22</sup> Obviously, it must not be forgotten that smoking has severe pathological  
21 consequences (being a serious danger for health) and nicotine is a drug responsible for  
22 smoking addiction. Nevertheless, as it has been hypothesized elsewhere,<sup>23</sup> a potential  
23 protective role for nicotinic agents (under controlled conditions) against COVID19 infection  
24 should be explored.  
25  
26  
27  
28  
29

30 Considering main exposure variables (i.e., common medications use), receiving diuretics  
31 appeared significantly associated with an increasing risk for COVID19. In contrast, while  
32 angiotensin receptors have been related with physiopathological mechanisms of SARS-COV-2  
33 infection,<sup>24,25</sup> receiving ACEIs/ARBs emerged associated with a reduced risk in this study. Since  
34 the beginning of the COVID19 global pandemic, concerns have been raised about the  
35 possibility that receiving ACEIs/ARBs could predispose individuals to severe COVID19.<sup>26,27</sup>  
36 These concerns were based on the fact that ACE2 receptors facilitates SARS-CoV-2 cell  
37 invasion; however, this negative effect was previously established during other earlier SARS-  
38 CoV outbreaks.<sup>24-27</sup> Most recent studies have concluded that there is no clinical or experimental  
39 evidence supporting that ACEIs or ARBs augment the susceptibility to SARS-CoV-2 or  
40 aggravate the severity and outcomes of COVID-19 at present.<sup>9,28-31</sup> Conversely, ACEIs and  
41 ARBs may be associated with lower incidence and/or improved outcome in patients with lower  
42 respiratory tract infections,<sup>32</sup> and lower risk of all-cause mortality among COVID19 hospitalized  
43 patients.<sup>33</sup> Our findings are in accordance with the above mentioned findings and supports that  
44 the use of RAAS-inhibitors could be beneficial in reducing risk for COVID19 infection.  
45  
46  
47  
48  
49  
50

51 Other cardiovascular medications (i.e., statins, antiplatelet and/or oral anticoagulant drugs) used  
52 before COVID19 exposition did not significantly alter the risk for COVID19 infection in the  
53 present study. The use of anticoagulant therapy has been proposed to reduce risk of thrombotic  
54 events during and after COVID19 infection, but studies analysing the influence of the use of  
55 these drugs before infection are scarce and mostly focused on interactions with antiviral  
56 therapy.<sup>34</sup> Considering specifically statins, it has been reported that adjuvant treatment and  
57  
58  
59  
60

1  
2  
3 continuation of pre-existing statin therapy could improve the clinical course of patients with  
4 COVID-19, either by their immunomodulatory action or by preventing cardiovascular damage.<sup>35</sup>

5  
6 Receiving NSADs or corticosteroids (which have been associated with good outcomes when  
7 using in severe COVID19 patients)<sup>36</sup> did not significantly alter risk for suffering infection in our  
8 study cohort. Available publications recommend caution until further evidence emerges  
9 surrounding the use of these drugs in COVID-19 patients.<sup>37</sup>

10  
11 Considering controversy about chloroquine/hydroxychloroquine use,<sup>38</sup> none COVID19 case was  
12 observed among 168 people receiving this drug (because systemic rheumatoid disease), but  
13 this study has lack statistical power to assess it.

14  
15 Antihistamine use was associated with an almost statistically significant reduction risk of  
16 COVID19 in the total study cohort, which would require further investigation. At present, there is  
17 no clear evidence that currently available antihistamines increase or decrease the risk of severe  
18 disease from COVID19. Of note, H1 receptors are expressed on the surface of the smooth  
19 musculature of the respiratory tract, neutrophils, eosinophil, macrophages, monocytes and T  
20 and B lymphocytes; however, it is not evaluated what the clinical significance of the effect of  
21 these drugs may be at this level.<sup>39</sup> Considering H2, famotidine use has been associated with  
22 improved clinical outcomes in hospitalized COVID19 patients.<sup>40</sup>

23  
24 Community-dwelling individuals who received influenza vaccination in prior autumn appeared  
25 at-decreased risk to suffer PCR-confirmed COVID19 in our adjusted analysis. Although this  
26 finding may be possibly related with residual confounding due to unmeasured factors (e.g, life-  
27 style or health care-related factors), it merits further investigations exploring a possible  
28 immunity-related mechanism explanation (which could be important for future prevention  
29 strategies). In this way, it has been hypothesized that the resultant immunity against prior  
30 influenza infection or vaccination would, at least in part, foster immunity against SARS-CoV-2  
31 because of cross reactivity of immunity between flu and coronavirus (due to similarities in their  
32 structures).<sup>41</sup>

33  
34 Major strengths in this study were its population-based design (a large cohort involving more  
35 than 79,000 people) and the use of multivariable analysis methods to estimate accurately  
36 possible relationships between suffering COVID19 and common chronic medical conditions and  
37 medications use among middle aged and older adults (who suffer the greatest burden of severe  
38 disease). The study has also several limitations, mainly related with its observational nature and  
39 retrospective design. Assessing COVID19, the most specific outcome is a laboratory-confirmed  
40 by PCR testing infection. However, this outcome depends on the reliability of RT-PCR  
41 performed (i.e, quality of the nasopharyngeal swabs specimen, timing of collection, sensitivity of  
42 tests used) and guidelines for testing over study period. On this concern, the availability of PCR  
43 tests was scarce at the beginning of the epidemic period in our setting and they were not  
44 routinely performed for all presumptive cases, being PCR tests prioritized for hospitalised or  
45 severe case patients. Obviously, residual confounding in incidence and risk estimates related to  
46 selection bias may not be excluded considering that PCR testing was not uniformly performed.

1  
2  
3 We did subgroup analysis (community-dwelling/nursing-home) and multivariable-adjustments  
4 but, as all observational studies, a residual confounding due to unmeasured factors (e.g,  
5 epidemiological, social, job and/or health care-related factors) may not be completely excluded.  
6 We have not data about need for hospitalisation and clinical course (hospitalisation/ICU  
7 admission or death) and, consequently, the study was not able to assess severity degree of  
8 cases. Despite the large size of the study cohort, there were relatively few events (n=380)  
9 which limits statistical power, especially in subgroup analysis. The study was conducted in a  
10 single geographical area and, logically, specific incidence data may not be directly extrapolated  
11 to other geographical regions with distinct epidemic conditions. Nevertheless, adjusted-risk  
12 estimates may be helpful to better characterize risk profile for suffering COVID19 infection  
13 among middle-aged and older adults in relation with common chronic medications use,  
14 providing new arguments to explore possible preventive/treatment research lines.  
15  
16

17  
18 In summary, our data supports that increasing age, nursing-home residence, pre-existing  
19 cancer, chronic respiratory and cardiac disease are independent major predisposing conditions  
20 to suffer COVID19 among middle-aged and older adults. Patients receiving diuretics were also  
21 at increased risk. Conversely, smokers (who suffered the lowest incidence), patients receiving  
22 RAAS inhibitors (and possibly antihistamines) and those community-dwelling individuals that  
23 received influenza vaccination in prior autumn appear at decreased risk, which should be  
24 closely investigated in future studies specifically focused on these concerns.  
25  
26

27  
28 We note that for most common chronic medications/treatments there is lacking data reporting  
29 the possible influence of previous use of these medications on the risk for developing COVID19  
30 infection. Meanwhile an efficacious treatment or vaccination will be available, RAAS-inhibitors  
31 and influenza vaccination (and possibly antihistamines and/or nicotine-related therapy) could be  
32 complementary tools partially protecting against COVID19.  
33  
34  
35  
36  
37  
38  
39  
40

41 **Author's contributions:** AVC designed the study and wrote the manuscript; CTF and FGB  
42 obtained data; ESG, IHG and CDC assessed outcomes; OOG and AVR did statistical analyses;  
43 FBR revised pharmacological data; AVC and JBG coordinated the study.  
44  
45  
46  
47

48 **Funding:** This study is supported by a grant from the Instituto de Salud Carlos III of the Spanish  
49 Health Ministry (file COV20/00852; call for the SARS-COV-2/COVID19 disease, RDL 8/2020,  
50 March 17, 2020). The funders had no role in study design, data collection and analysis,  
51 decision to publish, or preparation of the manuscript.  
52  
53  
54  
55

56 **Competing interest:** None declared  
57  
58  
59

60 **Patient consent for publication:** Not required.



1  
2  
3 **Ethics approval:** The study was approved by the ethical committee of the Institution (Ethics  
4 Committee IDIAP Jordi Gol, Barcelona, file 20/065-PCV) and was conducted according to the  
5 Helsinki Declaration and Spanish legislation on biomedical studies, data protection and respect  
6 for human rights.  
7  
8

9  
10  
11 **Data availability statement:** Data are available upon reasonable request  
12  
13

14  
15 **Patient and Public Involvement statement:** It was not appropriate or possible to involve  
16 patients or the public in the design, or conduct, or reporting, or dissemination plans of our  
17 research  
18  
19  
20  
21  
22  
23  
24  
25  
26  
27  
28  
29  
30  
31  
32  
33  
34  
35  
36  
37  
38  
39  
40  
41  
42  
43  
44  
45  
46  
47  
48  
49  
50  
51  
52  
53  
54  
55  
56  
57  
58  
59  
60

**REFERENCES**

1. World Health Organization. Coronavirus disease 2019 (COVID-19): situation report-87, [https://www.who.int/docs/default-source/coronaviruse/situation-reports/20200416-sitrep-87-covid-19.pdf?sfvrsn=9523115a\\_2](https://www.who.int/docs/default-source/coronaviruse/situation-reports/20200416-sitrep-87-covid-19.pdf?sfvrsn=9523115a_2) (2020, accessed 10 May 2020)
2. Yang J, Zheng Y, Gou X, et al. Prevalence of comorbidities and its effects in patients infected with SARS-CoV-2: a systematic review and meta-analysis. *Int J Infect Dis.* 2020; 94: 91-95.
3. Huang C, Wang Y, Li X, et al. Clinical features of patients infected with 2019 novel coronavirus in Wuhan, China. *Lancet.* 2020; 395:497-506.
4. Guan WJ, Ni ZY, Hu Y, et al. Clinical Characteristics of Coronavirus Disease 2019 in China. *N Engl J Med.* 2020; 382:1708-1720.
5. Wang D, Hu B, Hu C, et al. Clinical Characteristics of 138 Hospitalized Patients With 2019 Novel Coronavirus-Infected Pneumonia in Wuhan, China. *JAMA.* 2020; 323:1061–9.
6. Liang WH, Guan WJ, Li CC, et al. Clinical characteristics and outcomes of hospitalised patients with COVID-19 treated in Hubei (epicenter) and outside Hubei (non-epicenter): A Nationwide Analysis of China. *Eur Respir J.* 2020: 2000562.
7. Grasselli G, Zangrillo A, Zanella A, et al. Baseline Characteristics and Outcomes of 1591 Patients Infected With SARS-CoV-2 Admitted to ICUs of the Lombardy Region, Italy. *JAMA.* 2020; 323:1574-1581.
8. Zhou F, Yu T, Du R, et al. Clinical course and risk factors for mortality of adult inpatients with COVID-19 in Wuhan, China: a retrospective cohort study. *Lancet* 2020; 395:1054-62.
9. de Abajo FJ, Rodríguez-Martín S, Lerma V, et al. Use of renin-angiotensin-aldosterone system inhibitors and risk of COVID-19 requiring admission to hospital: a case-population study [published online ahead of print, 2020 May 14]. *Lancet.* 2020; S0140-6736(20)31030-8.
10. World Medical Association. WMA Declaration of Helsinki – Ethical Principles for Medical Research Involving Human Subjects. Available at: <https://www.wma.net/policies-post/wma-declaration-of-helsinki-ethical-principles-for-medical-research-involving-human-subjects/>. Accessed May 14, 2020.
11. Vila-Corcoles A, Hospital-Guardiola I, Ochoa-Gondar O, et al. Rationale and design of the CAPAMIS study: effectiveness of pneumococcal vaccination against community-acquired pneumonia, acute myocardial infarction and stroke. *BMC Public Health.* 2010;10:25.
12. Generalitat de Catalunya. Sub-direcció General de Vigilància i Resposta a Emergències de Salut Pública. Procediment d'actuació enfront de casos d'infecció pel nou coronavirus SARS-CoV-2. Available at: [https://canalsalut.gencat.cat/web/.content/\\_A-Z/C/coronavirus-2019-ncov/material-divulgatiu/procediment-actuacio-coronavirus.pdf](https://canalsalut.gencat.cat/web/.content/_A-Z/C/coronavirus-2019-ncov/material-divulgatiu/procediment-actuacio-coronavirus.pdf) Accessed May 16, 2020

- 1  
2  
3 13. Lieberman JA, Pepper G, Naccache SN, et al. Comparison of commercially available and  
4 laboratory developed assays for in vitro detection of sars-cov-2 in clinical laboratories. *J Clin*  
5 *Microbiol.* 2020;JCM.00821-20.  
6  
7  
8 14. Who Collaborating Centre for Drug Statistics Methodology. ATC/DDD Index 2020, Available  
9 at: [https://www.whocc.no/atc\\_ddd\\_index/](https://www.whocc.no/atc_ddd_index/) Accessed May 12, 2020.  
10  
11 15. Hosmer DW, Lemeshow S. *Applied Survival Analysis. Regression Modeling of Time to*  
12 *Event Data.* New York: John Wiley & Sons, 1999.  
13  
14 16. Gobierno de España. Secretaría General de Sanidad y Consumo. Dirección General de  
15 Salud Pública, Calidad e innovación. Centro de Coordinación de Alertas y Emergencias  
16 Sanitarias. Información científica-técnica. Enfermedad por coronavirus, COVID19. Actualización  
17 de abril, Available at:  
18 [https://www.mscbs.gob.es/profesionales/saludPublica/ccayes/alertasActual/nCov-](https://www.mscbs.gob.es/profesionales/saludPublica/ccayes/alertasActual/nCov-China/documentos/20200417_ITCoronavirus.pdf)  
19 [China/documentos/20200417\\_ITCoronavirus.pdf](https://www.mscbs.gob.es/profesionales/saludPublica/ccayes/alertasActual/nCov-China/documentos/20200417_ITCoronavirus.pdf) Accessed May 5, 2020.  
20  
21  
22 17. Deng G, Yin M, Chen X, Zeng F. Clinical determinants for fatality of 44,672 patients with  
23 COVID-19. *CritCare.* 2020; 24:179.  
24  
25 18. Guzik TJ, Mohiddin SA, Dimarco A, et al. COVID-19 and the cardiovascular system:  
26 implications for risk assessment, diagnosis, and treatment options [published online ahead of  
27 print, 2020 Apr 30]. *Cardiovasc Res.* 2020;cvaa106.  
28  
29 19. Cook TM. The importance of hypertension as a risk factor for severe illness and mortality in  
30 COVID-19. *Anaesthesia.* 2020; 75:976-977  
31  
32 20. Sattar N, McInnes IB, McMurray JJV. Obesity a risk factor for severe COVID-19 infection:  
33 Multiple potential mechanisms. *Circulation.* 2020. [Epub ahead of print].  
34  
35 21. Miyara M, Tubach F, Pourcher V, et al. Low incidence of daily active tobacco smoking in  
36 patients with symptomatic COVID-19. Preprint v3. Available at:  
37 <https://www.qeios.com/read/WPP19W.3> [Accessed 21 April 2020]  
38  
39 22. Lippi G, Henry BM. Active smoking is not associated with severity of coronavirus disease  
40 2019 (COVID-19). *Eur J Intern Med.* 2020; 75:107-108.  
41  
42 23. Changeux JP, Amoura Z, Rey F, Miyara M. (2020). A nicotinic hypothesis for Covid-19 with  
43 preventive and therapeutic implications. Available at: <https://www.qeios.com/read/FXGQSB>  
44 [Accessed 21 April 2020]  
45  
46 24. Wan Y, Shang J, Graham R, Baric RS, Li F. Receptor recognition by novel coronavirus from  
47 Wuhan: An analysis based on decade-long structural studies of SARS. *J Virology.* 2020;  
48 94:e00127-20.  
49  
50 25. Yan R, Zhang Y, Li Y, Xia L, Guo Y, Zhou Q. Structural basis for the recognition of SARS-  
51 CoV-2 by full-length human ACE2. *Science* 2020; 367:1444-8.  
52  
53  
54  
55  
56  
57  
58  
59  
60

- 1  
2  
3 26. Esler M, Esler D. Can angiotensin receptor-blocking drugs perhaps be harmful in the COVID-  
4 19 pandemic?. *J Hypertens*. 2020; 38(5):781-782.  
5  
6 27. Versmissen J, Verdonk K, Lafeber M, et al. Angiotensin-converting enzyme-2 in SARS-CoV-  
7 2 infection: good or bad?. *J Hypertens*. 2020;38:1196-1197.  
8  
9 28. Jarcho JA, Ingelfinger JR, Hamel MB, D'Agostino RB, Harrington DP. Inhibitors of the  
10 Renin-Angiotensin-Aldosterone System and Covid-19 [published online ahead of print, 2020  
11 May 1]. *N Engl J Med*. 2020; NEJMe2012924.  
12  
13 29. Reynolds HR, Adhikari S, Pulgarin C, et al. Renin-Angiotensin-Aldosterone System  
14 Inhibitors and Risk of Covid-19 [published online ahead of print, 2020 May 1]. *N Engl J Med*.  
15 2020;NEJMoa2008975.  
16  
17 30. Kai H, Kai M. Interactions of coronaviruses with ACE2, angiotensin II, and RAS inhibitors-  
18 lessons from available evidence and insights into COVID-19. *Hypertens Res*. 2020;1-7.  
19  
20 31. Meng J, Xiao G, Zhang J, et al. Renin-angiotensin system inhibitors improve the clinical  
21 outcomes of COVID-19 patients with hypertension. *Emerg Microbes Infect*. 2020; 9:757-760.  
22  
23 32. Kreutz R, Algharably EAE, Azizi M, et al. Hypertension, the renin-angiotensin system, and  
24 the risk of lower respiratory tract infections and lung injury: implications for COVID-19 [published  
25 online ahead of print, 2020 Apr 15]. *Cardiovasc Res*. 2020; cvaa097.  
26  
27 33. Zhang P, Zhu L, Cai J, et al. Association of inpatient use of angiotensin converting enzyme  
28 inhibitors and angiotensin II receptor blockers with mortality among patients with hypertension  
29 hospitalized with COVID-19 [published online ahead of print, 2020 Apr 17]. *Circ Res*.  
30 2020;10.1161/CIRCRESAHA.120.317134.  
31  
32 34. Testa S, Prandoni P, Paoletti O, et al. Direct oral anticoagulant plasma levels' striking  
33 increase in severe COVID-19 respiratory syndrome patients treated with antiviral agents: The  
34 Cremona experience. *J Thromb Haemost*. 2020; 00: 1-4.  
35  
36 35. Castiglione V, Chiriaco M, Emdin M, Taddei S, Vergaro G. Statin therapy in COVID-19  
37 infection [published online ahead of print, 2020 Apr 29]. *Eur Heart J Cardiovasc Pharmacother*.  
38 2020;pvaa042.  
39  
40 36. Wang Y, Jiang W, He Q, et al. Early, low-dose and short-term application of corticosteroid  
41 treatment in patients with severe COVID-19 pneumonia: single-center experience from Wuhan,  
42 China. Available at: <https://www.medrxiv.org/node/73427.external-links.html> [accessed May 4,  
43 2020]  
44  
45 37. Russell B, Moss C, Rigg A, et al. COVID-19 and treatment with NSAIDs and corticosteroids:  
46 should we be limiting their use in the clinical setting?. *Ecancermedicalscience*. 2020;14:1023.  
47  
48 38. Hernandez AV, Roman YM, Pasupuleti V, et al. Hydroxychloroquine or Chloroquine for  
49 Treatment or Prophylaxis of COVID-19: A Living Systematic Review *Ann Intern Med*.  
50 2020;10.7326/M20-2496.  
51  
52  
53  
54  
55  
56  
57  
58  
59  
60

- 1  
2  
3 39. Simons FE, Simons KJ. Histamine and H1-antihistamines: celebrating a century of progress.  
4 J Allergy Clin Immunol. 2011; 128: 1139-1150.  
5  
6 40. Freedberg DE, Conigliaro J, Wang TC, et al. Famotidine use is associated with improved  
7 clinical outcomes in hospitalized COVID-19 patients: A propensity score matched retrospective  
8 cohort study. Gastroenterology. 2020; S0016-5085.  
9  
10 41. Salem ML, El-Hennawy D. The possible beneficial adjuvant effect of influenza vaccine to  
11 minimize the severity of COVID-19. Med Hypotheses 2020;140:109752.  
12  
13  
14  
15  
16  
17  
18  
19  
20  
21  
22  
23  
24  
25  
26  
27  
28  
29  
30  
31  
32  
33  
34  
35  
36  
37  
38  
39  
40  
41  
42  
43  
44  
45  
46  
47  
48  
49  
50  
51  
52  
53  
54  
55  
56  
57  
58  
59  
60

For peer review only

Table 1. Incidence and risk of PCR-confirmed COVID19 cases according to baseline demographical and clinical characteristics (comorbidities/medications) in the total study cohort (N=79,083 ). Tarragona area (Southern Catalonia, Spain), 01/03/2020-23/05/2020.

| Characteristic                     | Study population<br>(N=79083)<br>n (%) | PCR-confirmed COVID19 cases (n=380)  |                          |
|------------------------------------|----------------------------------------|--------------------------------------|--------------------------|
|                                    |                                        | Univariate analysis<br>n (%) p-value | Incidence rate           |
| <b>Sociodemographical</b>          |                                        |                                      |                          |
| <b>Age:</b> 50-64 yrs              | 42684 (54.0)                           | 101 (26.6) <0.001                    | 236.6 (193.6-288.7)      |
| 65-79 yrs                          | 26013 (32.9)                           | 95 (25.0)                            | 365.2 (295.4-452.9)      |
| ≥80 yrs                            | 10386 (13.1)                           | 184 (48.4)                           | 1771.6 (1527.1-2055.1)   |
| <b>Sex</b> Men                     | 37626 (47.6)                           | 158 (41.6) 0.019                     | 419.9 (358.6-491.7)      |
| Women                              | 41457 (52.4)                           | 222 (58.4)                           | 535.5 (464.8-616.4)      |
| <b>Community-dwelling</b>          | 77676 (98.2)                           | 220 (57.9) <0.001                    | 283.2 (245.8-326.0)      |
| <b>Nursing-home residence</b>      | 1407 (1.8)                             | 160 (42.1)                           | 11371.7 (9711.4-13316.3) |
| <b>Comorbidities</b>               |                                        |                                      |                          |
| <b>Neurological disease</b>        | 2317 (2.9)                             | 66 (17.4) <0.001                     | 2848.5 (2236.1-3617.6)   |
| <b>Renal disease</b>               | 4476 (5.7)                             | 49 (12.9) <0.001                     | 1094.7 (812.3-1445.0)    |
| <b>Cancer</b>                      | 6630 (8.4)                             | 49 (12.9) 0.001                      | 739.1 (548.4-975.6)      |
| <b>Rheumatic disease</b>           | 872 (1.1)                              | 2 (0.5) 0.281                        | 229.4 (27.8-828.0)       |
| <b>Respiratory disease</b>         | 7272 (9.2)                             | 63 (16.6) <0.001                     | 866.3 (667.1-1126.2)     |
| <b>Cardiac disease</b>             | 13435 (17.0)                           | 123 (32.4) <0.001                    | 915.5 (762.6-1098.6)     |
| <b>Atrial fibrillation</b>         | 3786 (4.8)                             | 55 (14.5) <0.001                     | 1452.7 (1077.9-1917.6)   |
| <b>Liver disease</b>               | 1465 (1.9)                             | 8 (2.1) 0.714                        | 546.1 (235.4-1075.8)     |
| <b>Diabetes</b>                    | 13317 (16.8)                           | 102 (26.8) <0.001                    | 765.9 (626.5-934.4)      |
| <b>Hypertension</b>                | 34945 (44.2)                           | 223 (58.7) <0.001                    | 638.1 (553.9-734.5)      |
| <b>Hypercholesterolemia</b>        | 27314 (34.5)                           | 133 (35.0) 0.850                     | 486.9 (411.0-576.5)      |
| <b>Obesity</b>                     | 21678 (27.4)                           | 96 (25.3) 0.347                      | 442.8 (362.2-540.3)      |
| <b>Smoking</b>                     | 12750 (16.1)                           | 27 (7.1) <0.001                      | 211.8 (139.6-309.2)      |
| <b>Chronic medications use</b>     |                                        |                                      |                          |
| <b>Diuretics</b>                   | 8481 (10.7)                            | 111 (29.2) <0.001                    | 1308.8 (1090.2-1570.6)   |
| <b>Beta blockers</b>               | 9571 (12.1)                            | 68 (17.9) 0.001                      | 710.5 (557.7-902.3)      |
| <b>ACEIs</b>                       | 16419 (20.8)                           | 92 (24.2) 0.097                      | 560.3 (453.3-694.8)      |
| <b>ARBs</b>                        | 8869 (11.2)                            | 39 (10.3) 0.556                      | 439.7 (314.0-598.0)      |
| <b>Calcium channel blockers</b>    | 6490 (8.2)                             | 52 (13.7) <0.001                     | 801.2 (594.5-1057.6)     |
| <b>Statins</b>                     | 16134 (20.4)                           | 69 (18.2) 0.277                      | 427.7 (335.7-543.1)      |
| <b>Oral anticoagulants</b>         | 3912 (4.9)                             | 46 (12.1) <0.001                     | 1175.9 (857.2-1575.7)    |
| <b>Antiplatelet drugs</b>          | 9154 (11.6)                            | 86 (22.6) <0.001                     | 939.5 (760.0-1165.0)     |
| <b>Insulin</b>                     | 3042 (3.8)                             | 39 (10.3) <0.001                     | 1282.1 (915.4-1743.6)    |
| <b>Oral antidiabetic drugs</b>     | 10585 (13.4)                           | 69 (18.2) 0.006                      | 651.9 (511.7-827.9)      |
| <b>Inhaled respiratory drugs</b>   | 6293 (8.0)                             | 61 (16.1) <0.001                     | 969.3 (746.4-1260.1)     |
| <b>Antineoplastic agents</b>       | 1614 (2.0)                             | 8 (2.1) 0.929                        | 495.7 (213.6-976.5)      |
| <b>Systemic corticosteroids</b>    | 1252 (1.6)                             | 5 (1.3) 0.676                        | 399.4 (129.4-930.5)      |
| <b>NSADs</b>                       | 4321 (5.5)                             | 12 (3.2) 0.047                       | 277.7 (143.6-486.0)      |
| <b>Chloroquine</b>                 | 168 (0.2)                              | 0 (0.0) 0.367                        | 0 (-)                    |
| <b>Antihistamines</b>              | 3264 (4.1)                             | 7 (1.8) 0.025                        | 214.5 (86.0-446.1)       |
| <b>Proton-Pump Inhibitors</b>      | 17931 (22.7)                           | 142 (37.4) <0.001                    | 791.9 (668.4-937.6)      |
| <b>Benzodiazepines</b>             | 13046 (16.5)                           | 96 (25.3) <0.001                     | 735.9 (601.9-897.7)      |
| <b>Vaccination's history</b>       |                                        |                                      |                          |
| <b>Flu vaccine in prior autumn</b> | 22606 (28.6)                           | 205 (53.9) <0.001                    | 906.8 (787.1-1043.8)     |
| <b>Pneumococcal vaccinated</b>     | 26183 (33.1)                           | 213 (56.1) <0.001                    | 813.5 (706.1-936.3)      |

NOTE: P-values in univariate analysis were calculated by chi-squared, or Fisher's test as appropriate, comparing percentages in the study population vs COVID19 cases; IR denotes incidence rates per 100.000 persons period (12 weeks); CIs denotes confidence intervals for incidence rates and were calculated assuming a Poisson distribution for uncommon events.

Table 2. Cox regression analyses assessing unadjusted and adjusted risks to suffer PCR-confirmed COVID19 in the total study cohort (N=79,083). Tarragona area (Southern Catalonia, Spain) from 01/03/2020 to 23/05/2020.

| Characteristic                 | LC-COVID19 cases (n=349)          |                                 |
|--------------------------------|-----------------------------------|---------------------------------|
|                                | Unadjusted<br>HR (95% CI) p-value | Adjusted<br>HR (95% CI) p-value |
| <b>Sociodemographical</b>      |                                   |                                 |
| Age (continuous yrs)           | 1.07 (1.07-1.08) <0.001           | 1.02 (1.01-1.03) 0.002          |
| Sex: women                     | 1.28 (1.04-1.57) 0.019            | 0.95 (0.76-1.18) 0.624          |
| Nursing-home residence         | 42.14 (34.37-51.66) <0.001        | 21.83 (16.66-28.61) <0.001      |
| <b>Comorbidities</b>           |                                   |                                 |
| Neurological disease           | 7.03 (5.39-9.16) <0.001           | 1.31 (0.97-1.77) 0.074          |
| Renal disease                  | 2.47 (1.83-3.34) <0.001           | 0.91 (0.66-1.26) 0.556          |
| Cancer                         | 1.62 (1.20-2.19) 0.002            | 1.17 (0.86-1.60) 0.315          |
| Rheumatic disease              | 0.47 (0.12-1.90) 0.293            | 0.54 (0.13-2.19) 0.386          |
| Respiratory disease            | 1.97 (1.50-2.58) <0.001           | 1.29 (0.89-1.87) 0.184          |
| Cardiac disease                | 2.34 (1.89-2.90) <0.001           | 1.04 (0.80-1.34) 0.790          |
| Atrial fibrillation            | 3.38 (2.54-4.50) <0.001           | 1.17 (0.74-1.84) 0.514          |
| Liver disease                  | 1.14 (0.57-2.30) 0.712            | 1.16 (0.57-2.35) 0.684          |
| Diabetes                       | 1.81 (1.45-2.27) <0.001           | 1.10 (0.73-1.65) 0.646          |
| Hypertension                   | 1.80 (1.46-2.20) <0.001           | 0.98 (0.74-1.29) 0.869          |
| Hypercholesterolemia           | 1.02 (0.83-1.26) 0.851            | 0.88 (0.70-1.11) 0.269          |
| Obesity                        | 0.89 (0.71-1.13) 0.344            | 0.87 (0.68-1.11) 0.262          |
| Smoking                        | 0.40 (0.27-0.59) <0.001           | 0.62 (0.41-0.93) 0.022          |
| <b>Chronic medications use</b> |                                   |                                 |
| Diuretics                      | 3.45 (2.76-4.30) <0.001           | 1.35 (1.04-1.76) 0.026          |
| Beta blockers                  | 1.59 (1.22-2.06) 0.001            | 0.96 (0.72-1.29) 0.790          |
| ACEIs                          | 1.22 (0.96-1.54) 0.098            | 0.85 (0.65-1.13) 0.260          |
| ARBs                           | 0.90 (0.65-1.26) 0.552            | 0.68 (0.47-0.99) 0.046          |
| Calcium channel blockers       | 1.77 (1.32-2.38) <0.001           | 1.31 (0.95-1.79) 0.096          |
| Statins                        | 0.87 (0.67-1.12) 0.276            | 0.82 (0.60-1.11) 0.200          |
| Oral anticoagulants            | 2.65 (1.95-3.61) <0.001           | 1.26 (0.76-2.07) 0.371          |
| Antiplatelet drugs             | 2.24 (1.76-2.85) <0.001           | 1.35 (1.00-1.81) 0.051          |
| Insulin                        | 2.87 (2.06-3.99) <0.001           | 1.47 (0.98-2.21) 0.065          |
| Oral antidiabetic drugs        | 1.44 (1.11-1.86) 0.007            | 1.05 (0.69-1.59) 0.823          |
| Inhaled respiratory drugs      | 2.22 (1.69-2.92) <0.001           | 1.24 (0.84-1.81) 0.275          |
| Antineoplastic agents          | 1.03 (0.51-2.08) 0.929            | 1.06 (0.51-2.20) 0.876          |
| Systemic corticosteroids       | 0.83 (0.34-2.00) 0.677            | 0.57 (0.23-1.40) 0.218          |
| NSADs                          | 0.57 (0.32-1.00) 0.051            | 1.04 (0.58-1.87) 0.901          |
| Antihistamines                 | 0.44 (0.21-0.92) 0.029            | 0.47 (0.22-1.01) 0.052          |
| Proton-Pump Inhibitors         | 2.04 (1.66-2.51) <0.001           | 0.93 (0.72-1.19) 0.557          |
| Benzodiazepines                | 1.72 (1.36-2.16) <0.001           | 1.25 (0.98-1.60) 0.072          |
| <b>Vaccination's history</b>   |                                   |                                 |
| Flu vaccine in prior autumn    | 2.93 (2.40-3.59) <0.001           | 1.02 (0.79-1.32) 0.878          |
| Pneumococcal vaccination       | 2.58 (2.11-3.16) <0.001           | 1.02 (0.78-1.33) 0.904          |

NOTE: HRs denotes Hazard ratios, and were calculated for those who had the condition as compared with those who had not the condition. In adjusted analysis the HRs were adjusted for age (continuous years), sex, residence, comorbidities/underlying conditions and chronic medications use. CIs denote confidence intervals.

Table 3. Incidence and risk of PCR-confirmed COVID19 cases according to baseline demographical and clinical characteristics (comorbidities/medications) in subgroup analysis restricted to community-dwelling individuals (N=77,676). Tarragona area (Southern Catalonia, Spain), 01/03/2020-23/05/2020.

| Characteristic                     | Study population<br>(N=77676)<br>n (%) | PCR-confirmed COVID19 cases (n=220)  |                      |
|------------------------------------|----------------------------------------|--------------------------------------|----------------------|
|                                    |                                        | Univariate analysis<br>n (%) p-value | Incidence rate       |
| <b>Sociodemographical</b>          |                                        |                                      |                      |
| <b>Age:</b> 50-64 yrs              | 42533 (54.8)                           | 99 (45.0) <0.001                     | 232.8 (190.4-284.0)  |
| 65-79 yrs                          | 25713 (33.1)                           | 72 (32.7)                            | 280.0 (219.8-355.6)  |
| ≥80 yrs                            | 9430 (12.1)                            | 49 (22.3)                            | 519.6 (385.6-685.9)  |
| <b>Sex</b> Men                     | 37145 (47.8)                           | 108 (49.1) 0.706                     | 290.8 (237.8-354.7)  |
| Women                              | 40531 (52.2)                           | 112 (50.9)                           | 276.3 (230.2-331.6)  |
| <b>Comorbidities</b>               |                                        |                                      |                      |
| <b>Neurological disease</b>        | 1951 (2.5)                             | 11 (5.0) 0.018                       | 563.8 (281.3-1009.2) |
| <b>Renal disease</b>               | 4240 (5.5)                             | 26 (11.8) <0.001                     | 613.2 (400.4-901.4)  |
| <b>Cancer</b>                      | 6463 (8.3)                             | 32 (14.5) 0.001                      | 495.1 (334.2-708.0)  |
| <b>Rheumatic disease</b>           | 860 (1.1)                              | 1 (0.5) 0.354                        | 116.3 (2.9-647.7)    |
| <b>Respiratory disease</b>         | 7075 (9.1)                             | 47 (21.4) <0.001                     | 664.3 (484.3-890.2)  |
| <b>Cardiac disease</b>             | 12925 (16.6)                           | 68 (30.9) <0.001                     | 526.1 (413.0-668.2)  |
| <b>Atrial fibrillation</b>         | 3561 (4.6)                             | 26 (11.8) <0.001                     | 730.1 (476.8-1073.3) |
| <b>Liver disease</b>               | 1438 (1.9)                             | 6 (2.7) 0.334                        | 417.2 (153.1-909.6)  |
| <b>Diabetes</b>                    | 12926 (16.6)                           | 50 (22.7) 0.015                      | 386.8 (287.0-510.6)  |
| <b>Hypertension</b>                | 33996 (43.8)                           | 112 (50.9) 0.032                     | 329.5 (274.4-395.3)  |
| <b>Hypercholesterolemia</b>        | 26766 (34.5)                           | 74 (33.6) 0.797                      | 276.5 (217.0-351.1)  |
| <b>Obesity</b>                     | 21344 (27.5)                           | 57 (25.9) 0.602                      | 267.1 (205.6-347.2)  |
| <b>Smoking</b>                     | 12640 (16.3)                           | 19 (8.6) 0.002                       | 150.3 (90.5-234.5)   |
| <b>Chronic medications use</b>     |                                        |                                      |                      |
| <b>Diuretics</b>                   | 8028 (10.3)                            | 51 (23.2) <0.001                     | 635.3 (471.4-838.6)  |
| <b>Beta blockers</b>               | 9312 (12.0)                            | 40 (18.2) 0.005                      | 429.6 (306.7-584.2)  |
| <b>ACEIs</b>                       | 16031 (20.6)                           | 41 (18.6) 0.462                      | 255.8 (182.6-347.8)  |
| <b>ARBs</b>                        | 8709 (11.2)                            | 29 (13.2) 0.354                      | 333.0 (223.1-479.5)  |
| <b>Calcium channel blockers</b>    | 6316 (8.1)                             | 27 (12.3) 0.024                      | 427.5 (281.7-624.1)  |
| <b>Statins</b>                     | 15911 (20.5)                           | 47 (21.4) 0.746                      | 295.4 (215.3-395.8)  |
| <b>Oral anticoagulants</b>         | 3741 (4.8)                             | 27 (12.3) <0.001                     | 721.7 (475.6-1053.7) |
| <b>Antiplatelet drugs</b>          | 8810 (11.3)                            | 40 (18.2) 0.001                      | 454.0 (324.2-617.5)  |
| <b>Insulin</b>                     | 2904 (3.7)                             | 20 (9.1) <0.001                      | 688.7 (420.8-1060.6) |
| <b>Oral antidiabetic drugs</b>     | 10352 (13.3)                           | 34 (15.5) 0.353                      | 328.4 (228.9-456.5)  |
| <b>Inhaled respiratory drugs</b>   | 6095 (7.8)                             | 42 (19.1) <0.001                     | 689.1 (492.0-937.2)  |
| <b>Antineoplastic agents</b>       | 1581 (2.0)                             | 2 (0.9) 0.236                        | 126.5 (15.3-456.7)   |
| <b>Systemic corticosteroids</b>    | 1216 (1.6)                             | 5 (2.3) 0.397                        | 411.2 (133.2-958.1)  |
| <b>NSADs</b>                       | 4305 (5.5)                             | 12 (5.5) 0.955                       | 278.7 (144.1-487.8)  |
| <b>Antihistamines</b>              | 3221 (4.1)                             | 6 (2.7) 0.290                        | 186.3 (68.4-406.1)   |
| <b>Proton-Pump Inhibitors</b>      | 17315 (22.3)                           | 74 (33.6) <0.001                     | 427.4 (335.5-542.8)  |
| <b>Benzodiazepines</b>             | 12654 (16.3)                           | 49 (22.3) 0.016                      | 387.2 (287.3-511.1)  |
| <b>Vaccination's history</b>       |                                        |                                      |                      |
| <b>Flu vaccine in prior autumn</b> | 21570 (27.8)                           | 70 (31.8) 0.179                      | 324.5 (254.8-412.1)  |
| <b>Pneumococcal vaccinated</b>     | 25224 (32.5)                           | 100 (45.5) <0.001                    | 396.4 (324.3-483.7)  |

NOTE: P-values in univariate analysis were calculated by chi-squared, or Fisher's test as appropriate, comparing percentages in the study population vs COVID19 cases; IR denotes incidence rates per 100.000 persons period (12 weeks); CIs denotes confidence intervals for incidence rates and were calculated assuming a Poisson distribution for uncommon events.



Table 4. Cox regression analyses assessing unadjusted and adjusted risks to suffer PCR-confirmed COVID19 among community-dwelling individuals (N=77,676). Tarragona area (Southern Catalonia, Spain), 01/03/2020-23/05/2020.

| Characteristic                 | LC-COVID19 cases (n=201)          |                                 |
|--------------------------------|-----------------------------------|---------------------------------|
|                                | Unadjusted<br>HR (95% CI) p-value | Adjusted<br>HR (95% CI) p-value |
| <b>Sociodemographical</b>      |                                   |                                 |
| Age (continuous yrs)           | 1.03 (1.02-1.04) <0.001           | 1.01 (0.99-1.02) 0.573          |
| Sex: women                     | 0.95 (0.73-1.24) 0.708            | 0.97 (0.73-1.28) 0.807          |
| <b>Comorbidities</b>           |                                   |                                 |
| Neurological disease           | 2.04 (1.12-3.75) 0.021            | 1.06 (0.56-2.01) 0.857          |
| Renal disease                  | 2.32 (1.54-3.50) <0.001           | 1.22 (0.77-1.94) 0.398          |
| Cancer                         | 1.88 (1.29-2.73) 0.001            | 1.52 (1.03-2.24) 0.035          |
| Rheumatic disease              | 0.41 (0.06-2.91) 0.371            | 0.41 (0.06-2.97) 0.375          |
| Respiratory disease            | 2.72 (1.97-3.75) <0.001           | 1.82 (1.08-3.07) 0.025          |
| Cardiac disease                | 2.24 (1.69-2.99) <0.001           | 1.53 (1.06-2.19) 0.021          |
| Atrial fibrillation            | 2.79 (1.86-4.21) <0.001           | 1.06 (0.48-2.33) 0.882          |
| Liver disease                  | 1.49 (0.66-3.35) 0.336            | 1.24 (0.54-2.83) 0.608          |
| Diabetes                       | 1.47 (1.08-2.02) 0.016            | 1.26 (0.70-2.28) 0.441          |
| Hypertension                   | 1.33 (1.02-1.74) 0.034            | 1.06 (0.72-1.55) 0.785          |
| Hypercholesterolemia           | 0.96 (0.73-1.28) 0.798            | 0.88 (0.64-1.20) 0.405          |
| Obesity                        | 0.92 (0.68-1.25) 0.599            | 0.75 (0.54-1.03) 0.076          |
| Smoking                        | 0.49 (0.30-0.78) 0.003            | 0.49 (0.30-0.80) 0.004          |
| <b>Chronic medications use</b> |                                   |                                 |
| Diuretics                      | 2.62 (1.92-3.58) <0.001           | 1.54 (1.04-2.27) 0.031          |
| Beta blockers                  | 1.63 (1.16-2.30) 0.005            | 1.02 (0.69-1.52) 0.909          |
| ACEIs                          | 0.88 (0.63-1.24) 0.462            | 0.66 (0.44-0.99) 0.046          |
| ARBs                           | 1.20 (0.81-1.78) 0.356            | 0.75 (0.47-1.19) 0.222          |
| Calcium channel blockers       | 1.58 (1.06-2.36) 0.026            | 1.21 (0.78-1.87) 0.395          |
| Statins                        | 1.05 (0.76-1.46) 0.747            | 0.72 (0.49-1.06) 0.094          |
| Oral anticoagulants            | 2.77 (1.85-4.14) <0.001           | 1.58 (0.71-3.48) 0.261          |
| Antiplatelet drugs             | 1.74 (1.23-2.45) 0.002            | 1.30 (0.84-2.02) 0.243          |
| Insulin                        | 2.58 (1.63-4.08) <0.001           | 1.79 (1.00-3.21) 0.059          |
| Oral antidiabetic drugs        | 1.19 (0.82-1.71) 0.356            | 0.73 (0.40-1.32) 0.295          |
| Inhaled respiratory drugs      | 2.78 (1.99-3.89) <0.001           | 1.41 (0.81-2.45) 0.225          |
| Antineoplastic agents          | 0.44 (0.11-1.78) 0.250            | 0.36 (0.09-1.49) 0.159          |
| Systemic corticosteroids       | 1.46 (0.60-3.55) 0.400            | 1.03 (0.41-2.58) 0.945          |
| NSADs                          | 0.99 (0.55-1.76) 0.959            | 1.17 (0.65-2.12) 0.600          |
| Antihistamines                 | 0.65 (0.29-1.46) 0.294            | 0.51 (0.23-1.16) 0.109          |
| Proton-Pump Inhibitors         | 1.77 (1.34-2.34) <0.001           | 1.11 (0.79-1.57) 0.555          |
| Benzodiazepines                | 1.48 (1.07-2.03) 0.017            | 1.26 (0.90-1.76) 0.186          |
| <b>Vaccination's history</b>   |                                   |                                 |
| Flu vaccine in prior autumn    | 1.21 (0.91-1.61) 0.182            | 0.63 (0.44-0.91) 0.012          |
| Pneumococcal vaccination       | 1.73 (1.33-2.26) <0.001           | 1.29 (0.86-1.92) 0.214          |

NOTE: HRs denotes Hazard ratios, and were calculated for those who had the condition as compared with those who had not the condition. In multivariable-adjusted analysis, HRs were adjusted for age (continuous years), sex, residence, comorbidities/underlying conditions and chronic medications use. CIs denote confidence intervals.

Table 5. Univariate and multivariate analyses on laboratory-confirmed COVID19 cases according to baseline demographical and clinical characteristics (comorbidities/medications) in subgroup analysis restricted to nursing-home residents (N=1407). Tarragona area (Southern Catalonia, Spain) from 01/03/2020 to 23/05/2020.

| Characteristic                     | Study population<br>(N=1407)<br>n (%) | PCR-confirmed COVID19 cases (n=160)  |                                              |
|------------------------------------|---------------------------------------|--------------------------------------|----------------------------------------------|
|                                    |                                       | Univariate analysis<br>n (%) p value | Multivariate analysis<br>HR (95% CI) p value |
| <b>Sociodemographical</b>          |                                       |                                      |                                              |
| <b>Age:</b> 50-64 yrs              | 151 (10.7)                            | 2 (1.3) <0.001                       | 1.00 (reference)                             |
| 65-79 yrs                          | 300 (21.3)                            | 23 (14.4)                            | 6.66 (1.53-29.02) 0.012                      |
| ≥80 yrs                            | 956 (67.9)                            | 135 (84.4)                           | 13.16 (3.09-56.00) <0.001                    |
| <b>Sex:</b> Men                    | 481 (34.2)                            | 50 (31.3) 0.406                      | 1.00 (reference)                             |
| Women                              | 926 (65.8)                            | 110 (68.8)                           | 0.85 (0.59-1.24) 0.402                       |
| <b>Comorbidities</b>               |                                       |                                      |                                              |
| <b>Neurological disease</b>        | 366 (26.0)                            | 55 (34.4) 0.010                      | 1.25 (0.89-1.76) 0.193                       |
| <b>Renal disease</b>               | 236 (16.8)                            | 23 (14.4) 0.388                      | 0.68 (0.43-1.08) 0.104                       |
| <b>Cancer</b>                      | 167 (11.9)                            | 17 (10.6) 0.605                      | 0.74 (0.43-1.26) 0.264                       |
| <b>Rheumatic disease</b>           | 12 (0.9)                              | 1 (0.6) 0.739                        | 0.86 (0.12-6.43) 0.885                       |
| <b>Respiratory disease</b>         | 197 (14.0)                            | 16 (10.0) 0.121                      | 0.72 (0.39-1.31) 0.280                       |
| <b>Cardiac disease</b>             | 510 (36.2)                            | 55 (34.4) 0.601                      | 0.76 (0.52-1.09) 0.137                       |
| <b>Atrial fibrillation</b>         | 225 (16.0)                            | 29 (18.1) 0.434                      | 1.25 (0.71-2.20) 0.436                       |
| <b>Liver disease</b>               | 27 (1.9)                              | 2 (1.3) 0.512                        | 0.70 (0.17-2.88) 0.618                       |
| <b>Diabetes</b>                    | 391 (27.8)                            | 52 (32.5) 0.158                      | 1.08 (0.63-1.85) 0.786                       |
| <b>Hypertension</b>                | 949 (67.4)                            | 111 (69.4) 0.581                     | 0.89 (0.60-1.33) 0.562                       |
| <b>Hypercholesterolemia</b>        | 548 (38.9)                            | 59 (36.9) 0.568                      | 0.90 (0.64-1.26) 0.525                       |
| <b>Obesity</b>                     | 334 (23.7)                            | 39 (24.4) 0.841                      | 1.10 (0.75-1.61) 0.617                       |
| <b>Smoking</b>                     | 8 (5.0)                               | 110 (7.8) 0.158                      | 1.47 (0.68-3.17) 0.323                       |
| <b>Chronic medications use</b>     |                                       |                                      |                                              |
| <b>Diuretics</b>                   | 453 (32.2)                            | 60 (37.5) 0.127                      | 1.19 (0.83-1.70) 0.342                       |
| <b>Beta blockers</b>               | 259 (18.4)                            | 28 (17.5) 0.753                      | 0.90 (0.57-1.41) 0.642                       |
| <b>ACEIs</b>                       | 388 (27.6)                            | 51 (31.9) 0.196                      | 1.01 (0.69-1.47) 0.981                       |
| <b>ARBs</b>                        | 160 (11.4)                            | 10 (6.3) 0.030                       | 0.45 (0.23-0.90) 0.023                       |
| <b>Calcium channel blockers</b>    | 174 (12.4)                            | 25 (15.6) 0.184                      | 1.34 (0.85-2.12) 0.214                       |
| <b>Statins</b>                     | 223 (15.8)                            | 22 (13.8) 0.440                      | 0.99 (0.59-1.64) 0.964                       |
| <b>Oral anticoagulants</b>         | 171 (12.2)                            | 19 (11.9) 0.909                      | 0.81 (0.41-1.59) 0.534                       |
| <b>Antiplatelet drugs</b>          | 344 (24.4)                            | 46 (28.7) 0.179                      | 1.30 (0.85-1.98) 0.227                       |
| <b>Insulin</b>                     | 138 (9.8)                             | 19 (11.9) 0.350                      | 1.05 (0.59-1.86) 0.880                       |
| <b>Oral antidiabetic drugs</b>     | 233 (16.6)                            | 35 (21.9) 0.055                      | 1.56 (0.88-2.77) 0.131                       |
| <b>Inhaled respiratory drugs</b>   | 198 (14.1)                            | 19 (11.9) 0.396                      | 0.93 (0.53-1.64) 0.808                       |
| <b>Antineoplastic agents</b>       | 33 (2.3)                              | 6 (3.8) 0.212                        | 3.27 (1.34-7.94) 0.009                       |
| <b>Systemic corticosteroids</b>    | 36 (2.6)                              | 0 (-) 0.029                          | NA (-) -                                     |
| <b>NSADs</b>                       | 16 (1.1)                              | 0 (-) 0.150                          | NA (-) -                                     |
| <b>Antihistamines</b>              | 43 (3.1)                              | 1 (0.6) 0.058                        | 0.21 (0.03-1.54) 0.125                       |
| <b>Proton-Pump Inhibitors</b>      | 616 (4.8)                             | 68 (42.5) 0.729                      | 0.82 (0.57-1.18) 0.286                       |
| <b>Benzodiazepines</b>             | 392 (27.9)                            | 47 (29.4) 0.650                      | 1.02 (0.72-1.46) 0.911                       |
| <b>Vaccination's history</b>       |                                       |                                      |                                              |
| <b>Flu vaccine in prior autumn</b> | 1036 (73.6)                           | 135 (84.4) 0.001                     | 1.61 (0.98-2.59) 0.071                       |
| <b>Pneumococcal vaccination</b>    | 959 (68.2)                            | 1130.6) 0.477                        | 0.77 (0.53-1.10) 0.148                       |

NOTE: p-values in univariate analysis were calculated by chi-squared (or Fisher's test as appropriate) comparing percentages in the study population vs COVID19 cases; HR denotes multivariable-adjusted Hazard ratios (Cox regression) calculated for those who had the condition as compared with those who had not the condition, being adjusted by age (continuous), sex, pre-existing comorbidities and medications use.

FIGURE 1. Flow diagram of the study.

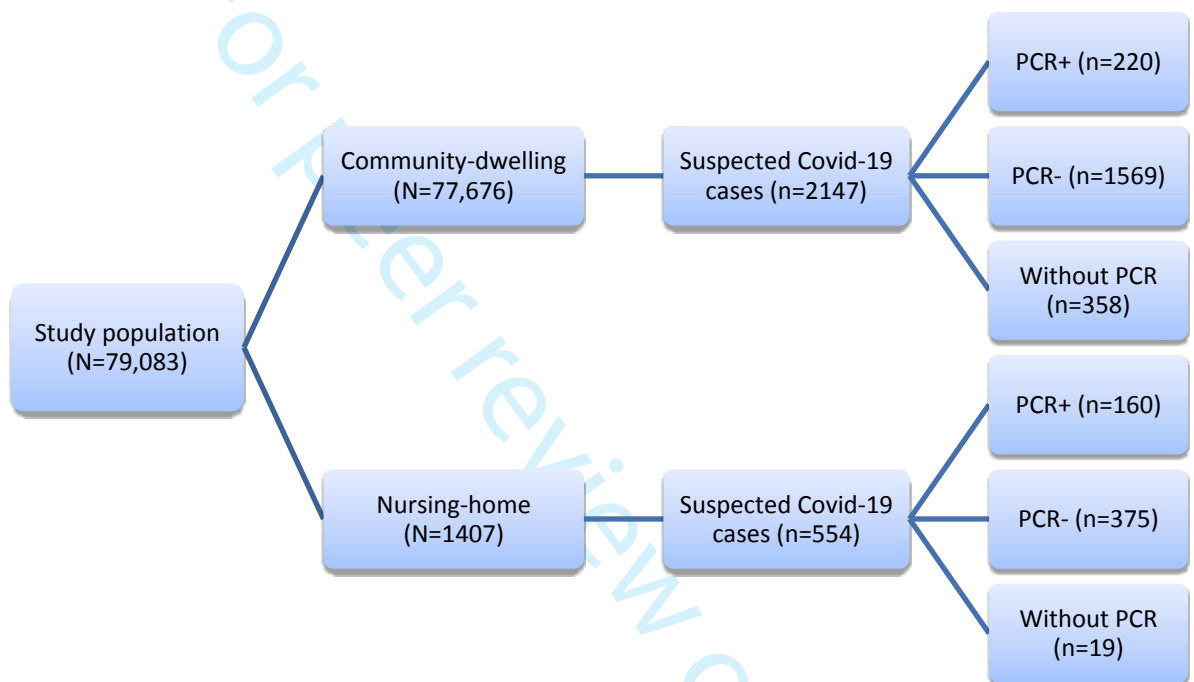

**APPENDIX. Criteria used to identify comorbidities and active medications in the study population.**

| Comorbidities and underlying conditions with ICD-10 codes [International Classification of Diseases, 10th Revision]                                                   |                                                          |
|-----------------------------------------------------------------------------------------------------------------------------------------------------------------------|----------------------------------------------------------|
| <b>Neurological disease:</b><br>Dementia<br>Ictus                                                                                                                     | F01-F03<br>I63, I61                                      |
| <b>Chronic renal failure</b>                                                                                                                                          | N18-N19                                                  |
| <b>Cancer</b> (solid organ or haematological neoplasia) in past 5 years                                                                                               | C00-C97                                                  |
| <b>Rheumatologic disease:</b><br>Rheumatoid arthritis, enteropathic arthropathies and juvenile arthritis<br>Systemic lupus erythematosus                              | M05-M09<br>M32                                           |
| <b>Chronic pulmonary/respiratory disease:</b><br>Chronic bronchitis/emphysema<br>Asthma<br>Other chronic pulmonary diseases                                           | J41-J44<br>J45-J46<br>P27, E84, J47                      |
| <b>Chronic heart disease:</b><br>Congestive heart failure<br>Coronary artery disease<br>Other chronic heart diseases                                                  | I50<br>I20-I22, I25<br>I05-I08, I11, I35-I37, I42, I51.7 |
| <b>Atrial Fibrillation</b>                                                                                                                                            | I48                                                      |
| <b>Chronic liver disease:</b><br>Chronic viral hepatitis<br>Cirrhosis<br>Alcoholic hepatitis                                                                          | B18<br>K74<br>K70                                        |
| <b>Diabetes mellitus</b>                                                                                                                                              | E10-E14                                                  |
| <b>Hypertension</b>                                                                                                                                                   | I10, I11, I12 o I15                                      |
| <b>Hypercholesterolemia</b>                                                                                                                                           | E78                                                      |
| <b>Obesity</b>                                                                                                                                                        | E66                                                      |
| <b>Smoking</b>                                                                                                                                                        | F17                                                      |
| Drugs identified in the patient treatment with codes of the Anatomical, Therapeutic, and Chemical classification system (ATC codes) of the World Health Organization: |                                                          |
| <b>Diuretics</b>                                                                                                                                                      | C03                                                      |
| <b>Beta blockers</b>                                                                                                                                                  | C07                                                      |
| <b>Angiotensin converter enzyme inhibitors (ACEIs)</b>                                                                                                                | C09A, C09B                                               |
| <b>Angiotensin II receptor blockers (ARBs)</b>                                                                                                                        | C09C, C09D                                               |
| <b>Calcium channel blockers</b>                                                                                                                                       | C08CA                                                    |
| <b>Statins</b>                                                                                                                                                        | C10AA                                                    |
| <b>Oral anticoagulant drugs</b>                                                                                                                                       | B01AA, B01AE, B01AF                                      |
| <b>Antiplatelet drugs</b>                                                                                                                                             | B01AC                                                    |
| <b>Insulin</b>                                                                                                                                                        | A10A                                                     |
| <b>Oral antidiabetic drugs</b>                                                                                                                                        | A10B                                                     |
| <b>Inhaled respiratory drugs</b>                                                                                                                                      | R03A, R03B                                               |
| <b>Antineoplastic agents</b>                                                                                                                                          | L01, L02B, L03, L04                                      |
| <b>Corticosteroids for systemic use</b>                                                                                                                               | H02A                                                     |
| <b>Non-steroids anti inflammatory drugs (NSADs)</b>                                                                                                                   | M01A                                                     |
| <b>Chloroquine/Hydroxychloroquine</b>                                                                                                                                 | P01BA01, P01BA02                                         |
| <b>Antihistamines for systemic use</b>                                                                                                                                | R06                                                      |
| <b>Proton pump inhibitors</b>                                                                                                                                         | A02BC                                                    |
| <b>Benzodiazepines</b>                                                                                                                                                | N05BA, N05CD, N05CF                                      |

STROBE Statement—Checklist of items that should be included in reports of *cohort studies*

|                              | Item No | Recommendation                                                                                                                                                                                                                                                                                                                                                          |
|------------------------------|---------|-------------------------------------------------------------------------------------------------------------------------------------------------------------------------------------------------------------------------------------------------------------------------------------------------------------------------------------------------------------------------|
| <b>Title and abstract</b>    | 1       | (a) Indicate the study's design with a commonly used term in the title or the abstract (p. 4) ✓<br>(b) Provide in the abstract an informative and balanced summary of what was done and what was found (p. 4) ✓                                                                                                                                                         |
| <b>Introduction</b>          |         |                                                                                                                                                                                                                                                                                                                                                                         |
| Background/rationale         | 2       | Explain the scientific background and rationale for the investigation being reported (p. 6) ✓                                                                                                                                                                                                                                                                           |
| Objectives                   | 3       | State specific objectives, including any prespecified hypotheses (p. 6) ✓                                                                                                                                                                                                                                                                                               |
| <b>Methods</b>               |         |                                                                                                                                                                                                                                                                                                                                                                         |
| Study design                 | 4       | Present key elements of study design early in the paper (p. 6) ✓                                                                                                                                                                                                                                                                                                        |
| Setting                      | 5       | Describe the setting, locations, and relevant dates, including periods of recruitment, exposure, follow-up, and data collection (p. 6-7) ✓                                                                                                                                                                                                                              |
| Participants                 | 6       | (a) Give the eligibility criteria, and the sources and methods of selection of participants. Describe methods of follow-up (p. 6) ✓<br>(b) For matched studies, give matching criteria and number of exposed and unexposed NOT APPLICABLE □                                                                                                                             |
| Variables                    | 7       | Clearly define all outcomes, exposures, predictors, potential confounders, and effect modifiers. Give diagnostic criteria, if applicable (p. 7-8) ✓                                                                                                                                                                                                                     |
| Data sources/<br>measurement | 8*      | For each variable of interest, give sources of data and details of methods of assessment (measurement). Describe comparability of assessment methods if there is more than one group (p. 6-7 and Appendix) ✓                                                                                                                                                            |
| Bias                         | 9       | Describe any efforts to address potential sources of bias (p. 12-13) ✓                                                                                                                                                                                                                                                                                                  |
| Study size                   | 10      | Explain how the study size was arrived at. NOT APPLICABLE (all people included)                                                                                                                                                                                                                                                                                         |
| Quantitative variables       | 11      | Explain how quantitative variables were handled in the analyses. If applicable, describe which groupings were chosen and why (p. 8) ✓                                                                                                                                                                                                                                   |
| Statistical methods          | 12      | (a) Describe all statistical methods, including those used to control for confounding (p. 8) ✓<br>(b) Describe any methods used to examine subgroups and interactions (p. 8) ✓<br>(c) Explain how missing data were addressed N/A ✓<br>(d) If applicable, explain how loss to follow-up was addressed. NOT APPLICABLE<br>(e) Describe any sensitivity analyses (p. 8) ✓ |
| <b>Results</b>               |         |                                                                                                                                                                                                                                                                                                                                                                         |
| Participants                 | 13*     | (a) Report numbers of individuals at each stage of study—eg numbers potentially eligible, examined for eligibility, confirmed eligible, included in the study, completing follow-up, and analysed (p. 9) ✓<br>(b) Give reasons for non-participation at each stage. NOT APPLICABLE<br>(c) Consider use of a flow diagram (Figure 1) ✓                                   |
| Descriptive data             | 14*     | (a) Give characteristics of study participants (eg demographic, clinical, social) and information on exposures and potential confounders (p. 19, Table 1) ✓<br>(b) Indicate number of participants with missing data for each variable of interest. NA<br>(c) Summarise follow-up time (eg, average and total amount) (p. 6) ✓                                          |
| Outcome data                 | 15*     | Report numbers of outcome events or summary measures over time (p. 9) ✓                                                                                                                                                                                                                                                                                                 |
| Main results                 | 16      | (a) Give unadjusted estimates and, if applicable, confounder-adjusted estimates and                                                                                                                                                                                                                                                                                     |

|                          |    |                                                                                                                                                                                         |
|--------------------------|----|-----------------------------------------------------------------------------------------------------------------------------------------------------------------------------------------|
|                          |    | their precision (eg, 95% confidence interval). Make clear which confounders were adjusted for and why they were included (p. 19-23, Tables 1-5) ✓                                       |
|                          |    | (b) Report category boundaries when continuous variables were categorized (p.19,21,23, Tables 1,3,5) ✓                                                                                  |
|                          |    | (c) If relevant, consider translating estimates of relative risk into absolute risk for a meaningful time period NA                                                                     |
| Other analyses           | 17 | Report other analyses done—eg analyses of subgroups and interactions, and sensitivity analyses (p. 22-23; Tables 4-5) ✓                                                                 |
| <b>Discussion</b>        |    |                                                                                                                                                                                         |
| Key results              | 18 | Summarise key results with reference to study objectives (p. 13) ✓                                                                                                                      |
| Limitations              | 19 | Discuss limitations of the study, taking into account sources of potential bias or imprecision. Discuss both direction and magnitude of any potential bias (p. 10-13) ✓                 |
| Interpretation           | 20 | Give a cautious overall interpretation of results considering objectives, limitations, multiplicity of analyses, results from similar studies, and other relevant evidence (p. 10-13) ✓ |
| Generalisability         | 21 | Discuss the generalisability (external validity) of the study results (p. 13) ✓                                                                                                         |
| <b>Other information</b> |    |                                                                                                                                                                                         |
| Funding                  | 22 | Give the source of funding and the role of the funders for the present study and, if applicable, for the original study on which the present article is based (p. 14) ✓                 |

\*Give information separately for exposed and unexposed groups.

**Note:** An Explanation and Elaboration article discusses each checklist item and gives methodological background and published examples of transparent reporting. The STROBE checklist is best used in conjunction with this article (freely available on the Web sites of PLoS Medicine at <http://www.plosmedicine.org/>, Annals of Internal Medicine at <http://www.annals.org/>, and Epidemiology at <http://www.epidem.com/>). Information on the STROBE Initiative is available at <http://www.strobe-statement.org>.

# BMJ Open

## Influence of prior comorbidities and chronic medications use on the risk of COVID19 in adults: a population based cohort study in Tarragona, Spain

|                                 |                                                                                                                                                                                                                                                                                                                                                                                                                                                                                                                                                                                                                                                                                                                                                                                                                                                                                                                                                                                                                                                                                                                                                                                                                                           |
|---------------------------------|-------------------------------------------------------------------------------------------------------------------------------------------------------------------------------------------------------------------------------------------------------------------------------------------------------------------------------------------------------------------------------------------------------------------------------------------------------------------------------------------------------------------------------------------------------------------------------------------------------------------------------------------------------------------------------------------------------------------------------------------------------------------------------------------------------------------------------------------------------------------------------------------------------------------------------------------------------------------------------------------------------------------------------------------------------------------------------------------------------------------------------------------------------------------------------------------------------------------------------------------|
| Journal:                        | <i>BMJ Open</i>                                                                                                                                                                                                                                                                                                                                                                                                                                                                                                                                                                                                                                                                                                                                                                                                                                                                                                                                                                                                                                                                                                                                                                                                                           |
| Manuscript ID                   | bmjopen-2020-041577.R1                                                                                                                                                                                                                                                                                                                                                                                                                                                                                                                                                                                                                                                                                                                                                                                                                                                                                                                                                                                                                                                                                                                                                                                                                    |
| Article Type:                   | Original research                                                                                                                                                                                                                                                                                                                                                                                                                                                                                                                                                                                                                                                                                                                                                                                                                                                                                                                                                                                                                                                                                                                                                                                                                         |
| Date Submitted by the Author:   | 08-Oct-2020                                                                                                                                                                                                                                                                                                                                                                                                                                                                                                                                                                                                                                                                                                                                                                                                                                                                                                                                                                                                                                                                                                                                                                                                                               |
| Complete List of Authors:       | Vila-Córcoles, Angel; Institut Catala De La Salut, Primary Healthcare Service Camp de Tarragona; IDIAP Jordi Gol, Unitat de Suport a la recerca Camp de Tarragona-Reus<br>Ochoa-Gondar, Olga; Institut Catala De La Salut, Primary Healthcare Service Camp de Tarragona; IDIAP Jordi Gol, Unitat de suport a la recerca Camp de Tarragona-Reus<br>Satué, EVA; Institut Catala De La Salut, Primary Healthcare Service Camp de Tarragona; IDIAP Jordi Gol, Unitat de suport a la recerca Camp de Tarragona-Reus<br>Torrente-Fraga, Cristina; Institut Catala De La Salut, Information and Communication Technologies<br>Gomez-Bertomeu, Frederic; Institut Catala De La Salut, Department of Microbiology. Hospital Universtari Joan XXIII<br>Vila-Rovira, Angel; IDIAP Jordi Gol, Unitat de suport a la recerca Camp de Tarragona-Reus<br>Hospital-Guardiola, Immaculada; Institut Catala De La Salut, Primary Healthcare Service Camp de Tarragona<br>de Diego-Cabanes, Cinta; Institut Catala De La Salut, Primary Healthcare Service Camp de Tarragona<br>Bejarano, Ferran; Institut Catala De La Salut, Department of Pharmacology. Primary Healthcare Service Camp de Tarragona<br>Basora-Gallisà, Josep; IDIAP Jordi Gol, Direction |
| <b>Primary Subject Heading</b>: | Infectious diseases                                                                                                                                                                                                                                                                                                                                                                                                                                                                                                                                                                                                                                                                                                                                                                                                                                                                                                                                                                                                                                                                                                                                                                                                                       |
| Secondary Subject Heading:      | Epidemiology                                                                                                                                                                                                                                                                                                                                                                                                                                                                                                                                                                                                                                                                                                                                                                                                                                                                                                                                                                                                                                                                                                                                                                                                                              |
| Keywords:                       | EPIDEMIOLOGY, Epidemiology < INFECTIOUS DISEASES, PRIMARY CARE, Public health < INFECTIOUS DISEASES                                                                                                                                                                                                                                                                                                                                                                                                                                                                                                                                                                                                                                                                                                                                                                                                                                                                                                                                                                                                                                                                                                                                       |
|                                 |                                                                                                                                                                                                                                                                                                                                                                                                                                                                                                                                                                                                                                                                                                                                                                                                                                                                                                                                                                                                                                                                                                                                                                                                                                           |

SCHOLARONE™  
Manuscripts

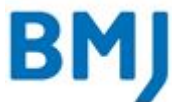

I, the Submitting Author has the right to grant and does grant on behalf of all authors of the Work (as defined in the below author licence), an exclusive licence and/or a non-exclusive licence for contributions from authors who are: i) UK Crown employees; ii) where BMJ has agreed a CC-BY licence shall apply, and/or iii) in accordance with the terms applicable for US Federal Government officers or employees acting as part of their official duties; on a worldwide, perpetual, irrevocable, royalty-free basis to BMJ Publishing Group Ltd ("BMJ") its licensees and where the relevant Journal is co-owned by BMJ to the co-owners of the Journal, to publish the Work in this journal and any other BMJ products and to exploit all rights, as set out in our [licence](#).

The Submitting Author accepts and understands that any supply made under these terms is made by BMJ to the Submitting Author unless you are acting as an employee on behalf of your employer or a postgraduate student of an affiliated institution which is paying any applicable article publishing charge ("APC") for Open Access articles. Where the Submitting Author wishes to make the Work available on an Open Access basis (and intends to pay the relevant APC), the terms of reuse of such Open Access shall be governed by a Creative Commons licence – details of these licences and which [Creative Commons](#) licence will apply to this Work are set out in our licence referred to above.

Other than as permitted in any relevant BMJ Author's Self Archiving Policies, I confirm this Work has not been accepted for publication elsewhere, is not being considered for publication elsewhere and does not duplicate material already published. I confirm all authors consent to publication of this Work and authorise the granting of this licence.



**TITLE PAGE**

**Title:** Influence of prior comorbidities and chronic medications use on the risk of COVID-19 in adults: a population based cohort study in Tarragona, Spain.

**Author and Co-author's name**

- 1) Angel Vila-Corcoles,
- 2) Olga Ochoa-Gondar,
- 3) Eva Satue-Gracia,
- 4) Cristina Torrente-Fraga,
- 5) Frederic Gomez-Bertomeu,
- 6) Angel Vila-Rovira,
- 7) Immaculada Hospital-Guardiola,
- 8) Cinta de Diego-Cabanes,
- 9) Ferran Bejarano-Romero
- 10) Josep Basora-Gallisa.

**Name, postal address, email, telephone, and fax numbers of the corresponding author.**

Name: Eva M<sup>a</sup> Satué Gracia

Postal address: C/ Rambla Nova, 124, Esc D, 1A, 43001, Tarragona (Spain)

Email: [esatue.tgn.ics@gencat.cat](mailto:esatue.tgn.ics@gencat.cat)

Telephone number. +0034977254021

Fax number: +0034977226411

**Full names, institutions, city, and country of all co-authors.**

1) FULL NAME: Angel Vila-Corcoles, MD ([avila.tgn.ics@gencat.cat](mailto:avila.tgn.ics@gencat.cat))

INSTITUTION 1: Primary Health Care Service Camp de Tarragona. Institut Catala de la Salut.

CITY: Tarragona

COUNTRY: Spain.

INSTITUTION 2: Unitat de Suport a la Recerca Camp de Tarragona-Reus. IDIAP Jordi Gol.

CITY: Barcelona

COUNTRY: Spain.

2) FULL NAME: Olga Ochoa-Gondar, MD ([oochoa.tgn.ics@gencat.cat](mailto:oochoa.tgn.ics@gencat.cat))

INSTITUTION 1: Primary Health Care Service Camp de Tarragona. Institut Catala de la Salut.

CITY: Tarragona

COUNTRY: Spain.

INSTITUTION 2: Unitat de Suport a la Recerca Camp de Tarragona-Reus. IDIAP Jordi Gol.

CITY: Barcelona

COUNTRY: Spain.

3) FULL NAME: Eva Satue-Gracia, MD ([esatue.tgn.ics@gencat.cat](mailto:esatue.tgn.ics@gencat.cat))

INSTITUTION 1: Primary Health Care Service Camp de Tarragona. Institut Catala de la Salut.

CITY: Tarragona

COUNTRY: Spain.

INSTITUTION 2: Unitat de Suport a la Recerca Camp de Tarragona-Reus. IDIAP Jordi Gol.

1  
2  
3 CITY: Barcelona  
4 COUNTRY: Spain.

5 4) FULL NAME: Cristina Torrente-Fraga, DM ([ctorrente.tgn.ics@gencat.cat](mailto:ctorrente.tgn.ics@gencat.cat))

6  
7 INSTITUTION 1: Department of information and communication technologies. DAP Camp de  
8 Tarragona. Institut Catala de la Salut.

9 CITY: Tarragona  
10 COUNTRY: Spain.

11 5) FULL NAME: Frederic Gomez-Bertomeu, MD ([ffgomez.hj23.ics@gencat.cat](mailto:ffgomez.hj23.ics@gencat.cat))

12  
13 INSTITUTION 1: Department of Microbiology. Hospital Universitari Joan XXIII. Institut Catala de  
14 la Salut.

15 CITY: Tarragona  
16 COUNTRY: Spain.

17 6) FULL NAME: Angel Vila-Rovira, DM ([vilapf@gmail.com](mailto:vilapf@gmail.com))

18  
19 INSTITUTION 1: Unitat de Suport a la Recerca Camp de Tarragona-Reus. IDIAP Jordi Gol.  
20 CITY: Barcelona

21 COUNTRY: Spain.  
22  
23

24 7) FULL NAME: Immaculada Hospital-Guardiola, PhD ([ihospitalg.tgn.ics@gencat.cat](mailto:ihospitalg.tgn.ics@gencat.cat))

25  
26 INSTITUTION 1: Primary Health Care Service Camp de Tarragona. Institut Catala de la Salut.

27 CITY: Tarragona

28 COUNTRY: Spain  
29  
30

31 8) FULL NAME: Cinta de Diego-Cabanes, MD ([mcdiego.tgn.ics@gencat.cat](mailto:mcdiego.tgn.ics@gencat.cat))

32  
33 INSTITUTION 1: Primary Health Care Service Camp de Tarragona. Institut Catala de la Salut.

34 CITY: Tarragona

35 COUNTRY: Spain  
36  
37

38 9) FULL NAME: Ferran Bejarano-Romero, PhD ([fbejarano.tgn.ics@gencat.cat](mailto:fbejarano.tgn.ics@gencat.cat))

39  
40 INSTITUTION 1: Department of Pharmacology. DAP Camp de Tarragona. Institut Catala de la  
41 Salut.

42 CITY: Tarragona

43 COUNTRY: Spain  
44

45 10) FULL NAME: Josep Basora-Gallisa, PhD ([jbasora@idiapjgol.org](mailto:jbasora@idiapjgol.org))

46  
47 INSTITUTION 1: Fundació Institut Universitari per a la recerca a l'Atenció Primària de Salut  
48 Jordi Gol i Gurina (IDIAPJGol)

49 CITY: Barcelona

50 COUNTRY: Spain.  
51

52 **KEYWORDS:** Coronavirus Infections, COVID-19, Incidence, Risk, Disease Prevention

53 **WORD COUNT:** 3832 words (including abstract)  
54  
55

56 **Contributors:** AVC designed the study and wrote the manuscript; CTF and FGB obtained data;  
57 ESG, IHG and CDC assessed outcomes; OOG and AVR did statistical analyses; FBR revised  
58 pharmacological data; AVC and JBG coordinated the study.  
59  
60

1  
2  
3 **Funding:** This study is supported by a grant from the Instituto de Salud Carlos III of the Spanish  
4 Health Ministry (file COV20/00852; call for the SARS-COV-2/COVID-19 disease, RDL 8/2020,  
5 March 17, 2020). The funders had no role in study design, data collection and analysis, decision  
6 to publish, or preparation of the manuscript  
7

8 **INTEREST CONFLICTS:** All authors, none declared.  
9  
10  
11  
12  
13  
14  
15  
16  
17  
18  
19  
20  
21  
22  
23  
24  
25  
26  
27  
28  
29  
30  
31  
32  
33  
34  
35  
36  
37  
38  
39  
40  
41  
42  
43  
44  
45  
46  
47  
48  
49  
50  
51  
52  
53  
54  
55  
56  
57  
58  
59  
60

For peer review only

1  
2  
3  
4 **Influence of prior comorbidities and chronic medications use on the risk of COVID-19 in**  
5 **adults: a population based cohort study in Tarragona, Spain)**  
6

7 **ABSTRACT**

8  
9 OBJECTIVE: To investigate possible relationships between pre-existing medical conditions  
10 (including common comorbidities and chronic medications) and risk for suffering COVID-19  
11 disease in middle-aged and older adults.

12 DESIGN: Population-based retrospective cohort study.

13 SETTING: twelve primary care centres (PCCs) in Tarragona (Spain).

14 PARTICIPANTS: 79,083 people (77,676 community-dwelling and 1407 nursing-home  
15 residents), who were all individuals >50 years affiliated to the 12 participating PCCs.

16  
17 OUTCOMES: Baseline cohort characteristics (age, sex, vaccinations, comorbidities and chronic  
18 medications) were established at study start (01/03/2020) and primary outcome was time to  
19 COVID-19 confirmed by PCR among cohort members throughout epidemic period (from  
20 01/03/2020 to 23/05/2020). Risk for suffering COVID-19 was evaluated by Cox regression,  
21 estimating multivariable hazard ratios (HRs) adjusted for age, sex, comorbidities and  
22 medications use.

23  
24 RESULTS: During study period, 2324 cohort members were PCR-tested, with 1944 negative  
25 and 380 positive results, which means an incidence of 480.5 PCR-confirmed COVID-19 cases  
26 per 100,000 persons-period. Assessing the total study cohort only age (HR: 1.02; 95% CI: 1.01-  
27 1.03; p=0.002), nursing-home residence (HR: 21.83; 95% CI: 16.66-28.61; p<0.001) and  
28 receiving diuretics (HR: 1.35; 95% CI: 1.04-1.76; p=0.026) appeared independently associated  
29 with increased risk. Smoking (HR: 0.62; 95%CI: 0.41-0.93; p=0.022), ACE-inhibitors (HR: 0.68;  
30 95%CI: 0.47-0.99; p=0.046) and antihistamine (HR: 0.47; 95% CI: 0.22-1.01; p=0.052) were  
31 associated with a lower risk. Among community-dwelling individuals, cancer (HR: 1.52; 95% CI:  
32 1.03-2.24; p=0.035), chronic respiratory disease (HR: 1.82; 95% CI: 1.08-3.07; p=0.025) and  
33 cardiac disease (HR: 1.53; 95% CI: 1.06-2.19; p=0.021) emerged also associated with an  
34 increased risk. Receiving ACE-inhibitors (HR: 0.66; 95% CI: 0.44-0.99; p=0.046) and flu  
35 vaccination (HR: 0.63; 95% CI: 0.44-0.91; p=0.012) were associated with decreased risk.

36 CONCLUSION: Age, nursing-home residence and multiple comorbidities appear predisposing  
37 for COVID-19. Conversely, receiving ACE-inhibitors, antihistamine and influenza vaccination  
38 could be protective, which should be closely investigated in further studies specifically focused  
39 on these concerns.

40  
41  
42 KEYWORDS: Coronavirus Infections, COVID-19, Incidence, Risk, Disease Prevention.  
43  
44  
45  
46  
47  
48  
49  
50  
51  
52  
53  
54  
55  
56  
57  
58  
59  
60

1  
2  
3  
4  
5  
6  
7  
8  
9  
10  
11  
12  
13  
14  
15  
16  
17  
18  
19  
20  
21  
22  
23  
24  
25  
26  
27  
28  
29  
30  
31  
32  
33  
34  
35  
36  
37  
38  
39  
40  
41  
42  
43  
44  
45  
46  
47  
48  
49  
50  
51  
52  
53  
54  
55  
56  
57  
58  
59  
60

**- Strengths and limitations of this study (per article summary)**

- This is a population-based cohort study involving 79,083 adults >50 years in Tarragona (Southern Catalonia, Spain)

- Cohort members were retrospectively followed across the first wave of COVID-19 epidemic period from 01/03/2020 to 23/05/2020.

- Relationships between PCR-confirmed COVID-19 incidence and chronic comorbidities and chronic medications use were assessed by multivariable Cox regression models.

- Despite the large size of study cohort, the number of events was relatively low, which limits statistical power (especially in subgroup analyses).

- PCR testing was not routinely performed (prioritized for severe case patients) and asymptomatic/oligosymptomatic cases were underestimated.

## INTRODUCTION

At present, available population-based clinical data on the current coronavirus SARS-COV-2 pandemic (COVID-19 disease) is limited. Most available clinical information is hospital-based data derived from severe cases (hospital/ICU admitted/deaths),<sup>1-4</sup> but there is few population- or community-based data involving a wide representative sample of the exposed population. In fact, there is very scarce data assessing incidence and risk for suffering infection in relation with pre-existing clinical characteristics of the population (i.e., baseline risk profile according to previous underlying conditions/medications use).<sup>5,6</sup>

Earlier studies regarding clinical characteristics and prevalence of comorbidities in patients infected with SARS-CoV-2 reported that diabetes mellitus, obesity, cardiovascular disease (including hypertension) chronic respiratory diseases and smoking were major risk factors associated with severe COVID-19.<sup>1-4</sup>

A more recent systematic review and meta-analysis has reported that COVID-19 patients with cardiovascular disease, hypertension, diabetes, congestive heart failure, chronic kidney disease and cancer have a greater risk of mortality compared to patients with COVID-19 without these comorbidities.<sup>7</sup> However, these results (mainly based on hospitalised cases and observational data) were likely to be confounded by age or other conditions (including sociodemographical) and therefore concerns have been raised about the possibility that some of these comorbidities/underlying conditions increase risk for severe disease, but they were not really related “per se” with an increased risk of infection.

Unlike most previous studies that examined risk factors for poor prognosis, few published studies have reported characteristics associated with susceptibility to SARS-CoV-2 infection. On this, recently published primary care cohort study from the Oxford Royal College of General Practitioners in the United Kingdom has reported similar risk factors associated with positive-PCR testing as observed for severe outcomes of COVID-19 in hospital settings, (except for smoking) and has provided some evidence of potential sociodemographic factors associated with a positive PCR-testing (including socioeconomic deprivation, population density and ethnicity).<sup>5</sup>

Considering the relationship between socio-demographic aspects and susceptibility for COVID-19, some studies reported that sex men older age are associated with a higher risk of infection and a worse prognosis But evidence on sociodemographical and clinical disparities related with the susceptibility for SARS-COV-2 infection is limited and new studies collecting this data are needed.<sup>5,6,8</sup>

In this context, this study was aimed to analyse incidence and risk for suffering COVID-19 in relation with pre-existing comorbidities and, especially, common chronic medications use among the general adult population over 50 years in Tarragona (Southern Catalonia, Spain) across the first 12-weeks pandemic period in the study area.

## METHODS

### Design, setting and study population

This is a retrospective cohort study involving 79,083 persons  $\geq 50$  years-old in the region of Tarragona (a residential-industrial urban area in Southern Catalonia, Spain, with an overall population of 210,672 all-age inhabitants). Cohort members were all persons  $>50$  years-old (birth day data before 01/01/1970) affiliated in the 12 participating primary care centres (PCCs) managed by the Institut Català de la Salut (ICS) in the study area. In the study setting (concretely “Tarragonés”, “Alt Camp” and “Conca de Barberà” counties) there are 16 PCCs overall. Of them, 12 PCCs (those included in this study) are managed by the ICS, whereas the remaining 4 PCCs are managed by other providers and were not included in the present study. The study cohort represents approximately a 75% of overall inhabitants aged 50 years or older in the study area according to census data.<sup>9</sup> Reference laboratory and hospital for the 12 participating PCCs were the Hospital Universitari Joan XXIII and its Microbiological Service in Tarragona city.

Figure 1 shows the distribution of the cohort members between nursing-home residents and community dwellings; and also the number of suspected cases and the PCR tests (positive and negative) performed in the aforementioned population subgroups.

Cohort members were retrospectively followed from 01/03/2020 (the beginning of epidemic period in the region), until the occurrence of any study event (COVID-19 diagnosis) or until the end of 12-weeks follow-up (23/05/2020). The study was approved by the ethical committee of the Institution (Ethics Committee IDIAP Jordi Gol, Barcelona, file 20/065-PCV) and was conducted according to the Helsinki Declaration and Spanish legislation on biomedical studies, data protection and respect for human rights.<sup>10</sup>

### Data sources

The pre-existing CAPAMIS Research Database, an institutional clinical research database previously used for other cohort studies in the study area<sup>11</sup> was quickly updated for use as the main data source in this COVID-19 epidemiological investigation. Briefly, this research database compiles data from the institutional PCCs' clinical records system (working since the 2000s), including administrative data and clinical information coded according to the International Classification of Diseases 10th Revision (ICD-10). It was used to identify sociodemographical characteristics, comorbidities, vaccinations history and active medications use among cohort members and to establish baseline characteristics of study population at study start (01/03/2020).

When COVID-19 epidemic period started in the study area, two electronic alerts including COVID-19's laboratory registries plus ICD-10 codes for COVID-19 suspicion (B34.2: unspecified Coronavirus infection; B97.29: Other coronavirus as the cause of diseases classified elsewhere) were added to the electronic PCCs clinical records system and, later, both data sources were linked to construct an anonymized research database used for this report.

### Outcomes

Primary outcome was COVID-19 diagnosed by polymerase chain reaction (PCR) occurred among cohort members across the study period (from 01/03/2020 to 23/05/2020). For descriptive results we also report laboratory-excluded cases (PCR performed with a negative result) and presumptive COVID-19 cases (persons coded as clinical suspicion alone without PCR tested). For laboratory diagnosis of COVID-19 by RT-PCR, guidelines of the Health Department of the Generalitat de Catalunya were followed.<sup>12</sup> Briefly, from the samples collected by nasal and pharyngeal swab with transport medium for viruses and refrigerated at 4°C for a maximum of 48 hours, the RT-PCR technique Cobas® SARS-CoV-2 with CE-FDA marking was performed with a sensitivity and specificity close to 100%.<sup>13</sup> At the beginning of the epidemic period, the availability for PCR testing was scarce, being prioritized for severe cases admitted in the hospital and nursing-home residences (where several outbreaks occurred), whereas less PCR tests were made among possible cases managed as outpatient.

## Exposure

Baseline use of common chronic medications, which could be hypothetically related with physiopathological mechanism of SARS-COV-2 infection or virulence (e.g., antihypertensive, antiplatelet/anticoagulant and/or anti-inflammatory drugs), were considered as main explanatory variables possibly related with the occurrence of COVID-19 for the present study. It was determined by a review of the PHCCs' electronic clinical records system which contains specially designated fields for medications prescribed. Thus, active medication treatments in each cohort member on 01/03/2020, coded according to the Anatomical, Therapeutic, and Chemical classification system (ATC) of the World Health Organization,<sup>14</sup> were identified from the patient treatment plan registered in the PCC's clinical records system, and included the following therapeutic groups: antihypertensive (diuretics, beta-blockers, angiotensin converting enzyme inhibitors [ACEIs], angiotensin II receptor blockers [ARBs], calcium channel blockers), statins, anticoagulants (warfarin and new oral anticoagulant drugs), antiplatelet drugs, antidiabetic drugs (insulin, oral antidiabetic drugs), inhaled respiratory drugs, antineoplastic agents, systemic corticosteroids, non-steroidal anti-inflammatory drugs (NSADs), chloroquine/hydroxychloroquine, antihistamines, proton-pump inhibitors and benzodiazepines (see Appendix).

## Covariates

Besides age, sex, residence (community-dwelling/nursing-home), and vaccinations' history (flu vaccination in prior autumn or pneumococcal vaccination at any time), the following comorbidities/underlying conditions were considered according to data registered in the electronic PCCs clinical records on 01/03/2020: neurological disease (including dementia and stroke), cancer (solid organ or haematological neoplasia diagnosed in past 5 years), chronic renal failure, systemic Autoimmune Rheumatic Diseases (including rheumatoid arthritis and lupus), chronic respiratory disease (including chronic bronchitis/emphysema and/or asthma), chronic heart disease (including congestive heart failure, coronary artery disease and other cardiopathies), atrial fibrillation, chronic liver disease (including chronic hepatitis and cirrhosis), hypertension, diabetes mellitus, hypercholesterolemia, obesity and smoking (see Appendix). Comorbidities were chosen on the basis of immunocompromise degree and risk for severe respiratory illness as usually used in other studies about community-acquired pneumonia.<sup>11</sup>

## Statistical analyses

Incidence rates (IRs) for PCR-confirmed COVID-19 were calculated per 100,000 person-period (12 weeks). Confidence intervals (CIs) for IRs were calculated assuming a Poisson distribution for uncommon events. In bivariate analyses, baseline characteristics according to suffer or not COVID-19 were compared using Chi-squared or Fisher's test as appropriate.

Cox regression analyses were used to calculate unadjusted and multivariable-adjusted hazards ratios (HRs) and estimate the association between baseline exposure conditions and the time to PCR-confirmed COVID-19 occurred among cohort members throughout the epidemic period (from 01/03/2020 to 23/05/2020).<sup>15</sup> The multivariable Cox models were made with all above mentioned exposure variables and co-variables (i.e, age, sex, residence, vaccinations history, comorbidities/underlying conditions and medications use). The method to select a subset of co-variables to include in the final model was the purposeful selection.<sup>15</sup> The final models include significant, confounders and all co-variables judged clinically or epidemiologically relevant. We performed a main analysis including the total study cohort (N=79,083) and two subgroup analyses restricted to community-dwelling individuals (N=77,676) and nursing-home residents (N=1407). Statistical significance was set at  $p < 0.05$  (two-tailed). Data was performed by using IBM SPSS Statistics for Windows, version 24 (IBM Corp., Armonk, N.Y., USA).



## RESULTS:

Across the study period an amount of 2324 cohort members were PCR tested. Of them, 380 (16.4%) presented a positive result (PCR-confirmed COVID-19) and 1944 (83.6%) presented a negative result. Additionally, 377 cohort members with presumptive COVID-19 (clinical suspicion alone) were not PCR tested.

As compared with the structure of the study population (54% aged 50-64 years vs 44% aged >65 years, 47.6% men vs 52.4% women, 98.2% community-dwelling vs 1.8% nursing-home residents), PCR testing was more frequently performed among elderly people and nursing-home residents. Indeed, PCR was tested (positive plus negative results) in 930 (40%) people aged 50-64 years vs 1394 (60%) in aged >65 years ( $p<0.001$ ), 1023 (44%) in men vs 1301 (56%) in women ( $p=0.007$ ) and 1789 (77%) in community-dwelling vs 535 (23%) in nursing-home residents ( $p<0.001$ ).

Of the 380 PCR-confirmed COVID-19 cases, 158 (41.6%) occurred in men and 222 (58.4%) in women. By age groups, 101 (26.6%) occurred in people 50-64 years, 95 (25%) in 65-79 years and 184 (48.4%) in 80 years or older. By residence, 160 cases (42.1%) occurred in nursing-home residents and 220 (57.9%) in community-dwelling individuals. This means an overall IR of 480.5 PCR-confirmed COVID-19 cases per 100,000 persons-period (236.6 in 50-64 yrs vs 365.2 in 65-79 yrs vs 1771.6 in 80 yrs or older; 419.9 in men vs 535.5 in women)

The most prevalent pre-existing comorbidities/underlying conditions among the 380 COVID-19 patients were hypertension (58.7%), hypercholesterolemia (35%), chronic cardiac disease (32.4%), diabetes (26.8%) and obesity (25.3%).

By underlying conditions, maximum IRs (per 100,000 persons-period) emerged among those persons with neurological diseases (2848.5) followed by atrial fibrillation (1452.7), chronic renal failure (1094.7), chronic heart disease (915.5), chronic respiratory disease (866.3), diabetes (765.9), cancer (739.1) and hypertension (638.1). Lower IRs were observed among persons with rheumatic diseases (229.4) and smokers (211.8). According to pre-existing active medications, maximum IRs (per 100,000) appeared among those receiving diuretics (1308.8), insulin (1282.1), oral anticoagulants (1175.9) and inhaled-respiratory therapy (969.3) (Table 1).

Table 2 shows unadjusted and multivariable adjusted analyses evaluating risk for suffering PCR-confirmed COVID-19 in the total study cohort. In the unadjusted analysis, many underlying conditions and medications use were associated with an increased risk. However, after multivariable-adjustment, only age (HR: 1.02; 95% CI: 1.01-1.03;  $p=0.002$ ), nursing-home residence (HR: 21.83; 95% CI: 16.66-28.61;  $p<0.001$ ) and receiving diuretics (HR: 1.35; 95% CI: 1.04-1.76;  $p=0.026$ ) appeared significantly associated with an increasing risk. Conversely, smoking (HR: 0.62; 95% CI: 0.41-0.93;  $p=0.022$ ), receiving angiotensin II receptor blockers (HR: 0.68; 95% CI: 0.47-0.99;  $p=0.046$ ) and antihistamines (HR: 0.47; 95% CI: 0.22-1.01;  $p=0.052$ ) appeared associated with a reduced risk.

Among community-dwelling individuals (N=77,676), 1789 people were PCR tested. Of them, 1569 (87.7%) presented a negative result and 220 (12.3%) a positive result. Additionally, 358 people were codified as presumptive COVID-19 cases (clinical suspicion without PCR performed). Table 3 shows distribution of PCR-confirmed COVID-19 cases and specific-IRs by demographical characteristics, underlying conditions and medications use among community-dwelling individuals. In the multivariable analysis focused on these community-dwelling individuals, chronic respiratory disease (HR: 1.82; 95% CI: 1.08-3.07;  $p=0.025$ ), cardiac disease (HR: 1.53; 95% CI: 1.06-2.19;  $p=0.021$ ) cancer (HR: 1.52; 95% CI: 1.03-2.24;  $p=0.035$ ) receiving diuretics (HR: 1.54; 95% CI: 1.04-2.27;  $p=0.031$ ) and insulin (HR: 1.79; 95% CI: 1.00-3.21;  $p=0.049$ ) were associated with an increasing risk, whereas smoking (HR: 0.49; 95% CI: 0.30-0.80;  $p=0.004$ ), receiving ACE-inhibitors (HR: 0.66; 95% CI: 0.44-0.99;  $p=0.046$ ) and influenza vaccination in prior autumn (HR: 0.63; 95% CI: 0.44-0.91;  $p=0.012$ ) were associated with a decreased risk (Table 4).

Among nursing-home residents (N=1407), where several outbreaks occurred, a total of 554 possible COVID-19 cases were observed. Of them, 375 were excluded by a PCR negative result, 160 were confirmed by positive PCR and 19 were not PCR tested. Table 5 shows univariate and multivariate analysis on PCR-confirmed COVID-19 cases in subgroup analysis restricted to nursing-home residents. In the multivariable analysis, increasing age and receiving

1  
2  
3 antineoplastic agents were associated with an increasing risk, whereas receiving angiotensin II  
4 receptor blockers was associated with a decreased risk (HR: 0.45; 95% CI: 0.23-0.90; p=0.023).  
5  
6

## 7 DISCUSSION

8 In the current context of COVID-19 clinical uncertainties, there is not clear evidence about  
9 possible clinical predisposing or protecting factors related with SARS-COV-2 infection. In the  
10 present study, the overall incidence rate of PCR-confirmed COVID-19 (480.5 cases per 100,000  
11 persons-period) may be considered intermediate/low as compared with other Spanish regions.<sup>16</sup>  
12

13 Considering sociodemographical variables, apart of nursing-home residence that increased  
14 more than twenty-times the adjusted-risk for PCR-confirmed COVID-19, we found that age  
15 increased approximately a 2% for each year the adjusted-risk for suffering COVID-19. Despite  
16 COVID-19 was more frequent in women, sex did not alter significantly the risk of infection in  
17 multivariable analysis.

18 None comorbidity appeared independently associated with a significant increased risk for PCR-  
19 confirmed COVID-19 in the multivariable analysis evaluating the total study population.  
20 Nevertheless, pre-existing cancer, chronic respiratory disease and cardiac disease emerged  
21 significantly associated with an increased risk in subgroup analysis focused on community-  
22 dwelling individuals. Hypertension, diabetes and/or obesity did not emerge independently  
23 associated with a significant increasing risk for suffering COVID-19 in our adjusted analyses.  
24 There is general consensus considering these conditions as major risk conditions related with  
25 poor prognosis in hospitalised COVID-19 patients,<sup>1-4,7,16-20</sup> but there is lacking data assessing  
26 the role of these conditions to predispose for suffering infection.<sup>2,16</sup>

27 Surprisingly, smoking was associated with a statistically significant decreased risk for suffering  
28 COVID-19 in both multivariable analyses assessing the total study cohort and the subgroup of  
29 community-dwelling individuals. This surprising data is not unique<sup>5,21</sup> and merits further  
30 investigations. Opposite findings about poor prognosis among smokers with COVID-19 have  
31 been reported.<sup>2,16,22</sup> Obviously, it must not be forgotten that smoking has severe pathological  
32 consequences (being a serious danger for health) and nicotine is a drug responsible for  
33 smoking addiction. Nevertheless, as it has been hypothesized elsewhere,<sup>23</sup> a potential  
34 protective role for nicotinic agents (under controlled conditions) against COVID-19 infection  
35 should be explored.

36 While angiotensin receptors have been related with physiopathological mechanisms of SARS-  
37 COV-2 infection,<sup>24,25</sup> receiving ACEIs/ARBs emerged associated with a reduced risk in this  
38 study. Since the beginning of the COVID-19 global pandemic, concerns have been raised about  
39 the possibility that receiving ACEIs/ARBs could predispose individuals to severe COVID-19.<sup>26,27</sup>  
40 These concerns were based on the fact that ACE2 receptors facilitates SARS-CoV-2 cell  
41 invasion; however, this negative effect was previously established during other earlier SARS-  
42 CoV outbreaks.<sup>24-27</sup> Most recent studies have concluded that there is no clinical or experimental  
43 evidence supporting that ACEIs or ARBs augment the susceptibility to SARS-CoV-2 or  
44 aggravate the severity and outcomes of COVID-19 at present.<sup>28-31</sup> Conversely, ACEIs and ARBs  
45 may be associated with lower incidence and/or improved outcome in patients with lower  
46 respiratory tract infections,<sup>32</sup> and lower risk of all-cause mortality among COVID-19 hospitalized  
47 patients.<sup>33</sup> Our findings are in accordance with the above mentioned findings and supports that  
48 the use of RAAS-inhibitors could be beneficial in reducing risk for COVID-19 infection.

49 Other cardiovascular medications (i.e., statins, antiplatelet and/or oral anticoagulant drugs) used  
50 before COVID-19 exposition did not significantly alter the risk for COVID-19 in the present  
51 study. The use of anticoagulant therapy has been proposed to reduce risk of thrombotic events  
52 during and after COVID-19, but studies analysing the influence of the use of these drugs before  
53 infection are scarce and mostly focused on interactions with antiviral therapy.<sup>34</sup> Considering  
54 specifically statins, it has been reported that adjuvant treatment and continuation of pre-existing  
55 statin therapy could improve the clinical course of patients with COVID-19, either by their  
56 immunomodulatory action or by preventing cardiovascular damage.<sup>35</sup>

57 Receiving NSADs or corticosteroids (which have been associated with good outcomes when  
58 using in severe COVID-19 patients)<sup>36</sup> did not significantly alter risk for suffering infection in our  
59 study cohort. A pre-print study has reported that prior use of oral steroid medications was  
60 associated with decreased COVID-19 positive testing risk, but increased inpatient admission

1  
2  
3 risk.<sup>6</sup> Available publications recommend caution until further evidence emerges surrounding the  
4 use of these drugs in COVID-19 patients.<sup>37</sup>

5 Considering controversy about chloroquine/hydroxychloroquine use,<sup>38</sup> none COVID-19 case  
6 was observed among 168 people receiving this drug (because systemic rheumatoid disease),  
7 but this study has lack statistical power to assess it.

8  
9 Antihistamine use was associated with an almost statistically significant reduction risk of  
10 COVID-19 in the total study cohort, which would require further investigation. At present, there  
11 is no clear evidence that currently available antihistamines increase or decrease the risk of  
12 severe disease from COVID-19. Of note, H1 receptors are expressed on the surface of the  
13 smooth musculature of the respiratory tract, neutrophils, eosinophil, macrophages, monocytes  
14 and T and B lymphocytes; however, it is not evaluated what the clinical significance of the effect  
15 of these drugs may be at this level.<sup>39</sup> Considering H2, famotidine use has been associated with  
16 improved clinical outcomes in hospitalized COVID-19 patients.<sup>40</sup>

17 Community-dwelling individuals who received influenza vaccination in prior autumn appeared  
18 at-decreased risk to suffer PCR-confirmed COVID-19 in our adjusted analysis. Although this  
19 finding may be possibly related with residual confounding due to unmeasured factors (e.g, life-  
20 style or health care-related factors), it merits further investigations exploring a possible  
21 immunity-related mechanism explanation (which could be important for future prevention  
22 strategies). In this way, it has been hypothesized that the resultant immunity against prior  
23 influenza infection or vaccination would, at least in part, foster immunity against SARS-CoV-2  
24 because of cross reactivity of immunity between flu and coronavirus (due to similarities in their  
25 structures).<sup>41</sup>

26 Major strengths in this study were its population-based design (a large cohort involving more  
27 than 79,000 people) and the use of multivariable analysis methods to estimate accurately  
28 possible relationships between suffering COVID-19 and common chronic medical conditions  
29 and medications use among middle aged and older adults (who suffer the greatest burden of  
30 severe disease). The study has also several limitations, mainly related with its observational  
31 nature and retrospective design. Assessing COVID-19, the most specific outcome is a  
32 laboratory-confirmed by PCR testing infection. However, this outcome depends on the reliability  
33 of RT-PCR performed (i.e, quality of the nasopharyngeal swabs specimen, timing of collection,  
34 sensitivity of tests used) and guidelines for testing over study period. On this concern, the  
35 availability of PCR tests was scarce at the beginning of the epidemic period in our setting and  
36 they were not routinely performed for all presumptive cases, being PCR tests prioritized for  
37 hospitalised or severe case patients. Obviously, residual confounding in incidence and risk  
38 estimates related to selection bias may not be excluded considering that PCR testing was not  
39 uniformly performed.

40 Of note, most COVID-19 cases included in this study were those who were severe enough to  
41 warrant medical attention during the epidemic period. Thus, it must be highlighted that those  
42 cohort members who were asymptomatic but SARS-CoV-2 infected, those that were  
43 oligosymptomatic, and those that had mild symptoms (who mostly were in self isolation and self-  
44 medicating in accordance with the recommendations of the health authorities at the time) were  
45 largely underestimated in the present study.

46 We did subgroup analysis (community-dwelling/nursing-home) and multivariable-adjustments  
47 but, as all observational studies, a residual confounding due to unmeasured factors (e.g,  
48 epidemiological, social, job and/or health care-related factors) may not be completely excluded.  
49 We have not data about need for hospitalisation and clinical course (hospitalisation/ICU  
50 admission or death) and, consequently, the study was not able to assess severity degree of  
51 cases. Despite the large size of the study cohort, there were relatively few events (n=380)  
52 which limits statistical power, especially in subgroup analysis. The study was conducted in a  
53 single geographical area and, logically, specific incidence data may not be directly extrapolated  
54 to other geographical regions with distinct epidemic conditions. Nevertheless, adjusted-risk  
55 estimates may be helpful to better characterize risk profile for suffering COVID-19 among  
56 middle-aged and older adults in relation with common chronic medications use, providing new  
57 arguments to explore possible preventive/treatment research lines.

58 In summary, our data supports that increasing age, nursing-home residence, pre-existing  
59 cancer, chronic respiratory and cardiac disease are independent major predisposing conditions  
60 to suffer COVID-19 among middle-aged and older adults. Patients receiving diuretics were also

1  
2  
3 at increased risk. Conversely, smokers (who suffered the lowest incidence), patients receiving  
4 RAAS inhibitors (and possibly antihistamines) and those community-dwelling individuals that  
5 received influenza vaccination in prior autumn appear at decreased risk, which should be  
6 closely investigated in future studies specifically focused on these concerns. We note that for  
7 most common chronic medications/treatments there is lacking data reporting the possible  
8 influence of previous use of these medications on the risk for developing COVID-19.

9  
10 Since a clinical and public health-oriented point of view, meanwhile an efficacious treatment or  
11 vaccination against COVID-19 will be available, universal influenza vaccination, RAAS-inhibitors  
12 in cardiovascular patients and possibly antihistamine drugs in allergic patients could be  
13 complementary tools partially protecting against COVID-19.  
14  
15  
16  
17  
18  
19  
20  
21  
22  
23  
24  
25  
26  
27  
28  
29  
30  
31  
32  
33  
34  
35  
36  
37  
38  
39  
40  
41  
42  
43  
44  
45  
46  
47  
48  
49  
50  
51  
52  
53  
54  
55  
56  
57  
58  
59  
60

For peer review only

1  
2  
3  
4  
5  
6  
7  
8  
9  
10  
11  
12  
13  
14  
15  
16  
17  
18  
19  
20  
21  
22  
23  
24  
25  
26  
27  
28  
29  
30  
31  
32  
33  
34  
35  
36  
37  
38  
39  
40  
41  
42  
43  
44  
45  
46  
47  
48  
49  
50  
51  
52  
53  
54  
55  
56  
57  
58  
59  
60

**Author's contributions:** AVC designed the study and wrote the manuscript; CTF and FGB obtained data; ESG, IHG and CDC assessed outcomes; OOG and AVR did statistical analyses; FBR revised pharmacological data; AVC and JBG coordinated the study.

**Funding:** This study is supported by a grant from the Instituto de Salud Carlos III of the Spanish Health Ministry (file COV20/00852; call for the SARS-COV-2/COVID-19 disease, RDL 8/2020, March 17, 2020). The funders had no role in study design, data collection and analysis, decision to publish, or preparation of the manuscript.

**Competing interest:** None declared

**Patient consent for publication:** Not required.

**Ethics approval:** The study was approved by the ethical committee of the Institution (Ethics Committee IDIAP Jordi Gol, Barcelona, file 20/065-PCV) and was conducted according to the Helsinki Declaration and Spanish legislation on biomedical studies, data protection and respect for human rights.

**Data availability statement:** Data are available upon reasonable request

**Patient and Public Involvement statement:** It was not appropriate or possible to involve patients or the public in the design, or conduct, or reporting, or dissemination plans of our research

## REFERENCES

1. Yang J, Zheng Y, Gou X, et al. Prevalence of comorbidities and its effects in patients infected with SARS-CoV-2: a systematic review and meta-analysis. *Int J Infect Dis.* 2020; 94: 91-95.
2. Liang WH, Guan WJ, Li CC, et al. Clinical characteristics and outcomes of hospitalised patients with COVID-19 treated in Hubei (epicenter) and outside Hubei (non-epicenter): A Nationwide Analysis of China. *Eur Respir J.* 2020: 2000562.
3. Grasselli G, Zangrillo A, Zanella A, et al. Baseline Characteristics and Outcomes of 1591 Patients Infected With SARS-CoV-2 Admitted to ICUs of the Lombardy Region, Italy. *JAMA* 2020; 323:1574-1581.
4. Zhou F, Yu T, Du R, et al. Clinical course and risk factors for mortality of adult inpatients with COVID-19 in Wuhan, China: a retrospective cohort study. *Lancet* 2020; 395:1054-62.
5. de Lusignan S, Dorward J, Correa A, et al. Risk factors for SARS-CoV-2 among patients in the Oxford Royal College of General Practitioners Research and Surveillance Centre primary care network: a cross-sectional study. *Lancet Infect Dis.* 2020;20(9):1034-1042.
6. Chang TS, Ding Y, Freund MK, et al. Prior diagnoses and medications as risk factors for COVID-19 in a Los Angeles Health System. Preprint. medRxiv. 2020;2020.07.03.20145581. Published 2020 Jul 4.
7. Ssentongo P, Ssentongo AE, Heilbrunn ES, Ba DM, Chinchilli VM. Association of cardiovascular disease and 10 other pre-existing comorbidities with COVID-19 mortality: A systematic review and meta-analysis. *PLoS One.* 2020;15(8):e0238215.
8. Vahidy FS, Nicolas JC, Meeks JR, et al. Racial and ethnic disparities in SARS-CoV-2 pandemic: analysis of a COVID-19 observational registry for a diverse US metropolitan population. *BMJ Open.* 2020;10(8):e039849.
9. IDESCAT. Statistical Institute of Catalonia. Available at: <https://www.idescat.cat/?lang=en>. [Accessed 2 October 2020]
10. World Medical Association. WMA Declaration of Helsinki – Ethical Principles for Medical Research Involving Human Subjects. Available at: <https://www.wma.net/policies-post/wmadeclaration-of-helsinki-ethical-principles-for-medical-research-involving-human-subjects/>. [Accessed 14 May 2020].
11. Vila-Corcoles A, Hospital-Guardiola I, Ochoa-Gondar O, et al. Rationale and design of the CAPAMIS study: effectiveness of pneumococcal vaccination against community-acquired pneumonia, acute myocardial infarction and stroke. *BMC Public Health.* 2010;10:25.
12. Generalitat de Catalunya. Sub-direcció General de Vigilància i Resposta a Emergències de Salut Pública. Procediment d'actuació enfront de casos d'infecció pel nou coronavirus SARSCoV-2. Available at: [https://canalsalut.gencat.cat/web/.content/\\_A-Z/C/coronavirus-2019-ncov/material-divulgatiu/procediment-actuacio-coronavirus.pdf](https://canalsalut.gencat.cat/web/.content/_A-Z/C/coronavirus-2019-ncov/material-divulgatiu/procediment-actuacio-coronavirus.pdf) [Accessed 16 May 2020]
13. Lieberman JA, Pepper G, Naccache SN, et al. Comparison of commercially available and laboratory developed assays for in vitro detection of sars-cov-2 in clinical laboratories. *J Clin Microbiol.* 2020:JCM.00821-20.
14. Who Collaborating Centre for Drug Statistics Methodology. ATC/DDD Index 2020, Available at: [https://www.whocc.no/atc\\_ddd\\_index/](https://www.whocc.no/atc_ddd_index/) [Accessed 12 May 2020].
15. Hosmer DW, Lemeshow S. Applied Survival Analysis. Regression Modeling of Time to Event Data. New York: John Wiley & Sons, 1999.
16. Gobierno de España. Secretaría General de Sanidad y Consumo. Dirección General de Salud Pública, Calidad e innovación. Centro de Coordinación de Alertas y Emergencias Sanitarias. Información científica-técnica. Enfermedad por coronavirus, COVID19. Actualización de abril, Available at: [https://www.mschs.gob.es/profesionales/saludPublica/ccayes/alertasActual/nCov/documentos/20200417\\_ITCoronavirus.pdf](https://www.mschs.gob.es/profesionales/saludPublica/ccayes/alertasActual/nCov/documentos/20200417_ITCoronavirus.pdf) [Accessed 5 May 2020].

17. Deng G, Yin M, Chen X, Zeng F. Clinical determinants for fatality of 44,672 patients with COVID-19. *CritCare*. 2020; 24:179.
18. Guzik TJ, Mohiddin SA, Dimarco A, et al. COVID-19 and the cardiovascular system: implications for risk assessment, diagnosis, and treatment options. *Cardiovasc Res*. 2020;116(10):1666-1687.
19. Cook TM. The importance of hypertension as a risk factor for severe illness and mortality in COVID-19. *Anaesthesia*. 2020; 75:976-977.
20. Sattar N, McInnes IB, McMurray JJV. Obesity Is a Risk Factor for Severe COVID-19 Infection: Multiple Potential Mechanisms. *Circulation*. 2020;142(1):4-6.
21. Miyara M, Tubach F, Pourcher V, et al. Low incidence of daily active tobacco smoking in patients with symptomatic COVID-19. *Qeios*. doi:10.32388/WPP19W.2. Preprint v3. Available at: <https://www.queios.com/read/WPP19W.3> [Accessed 21 April 2020]
22. Lippi G, Henry BM. Active smoking is not associated with severity of coronavirus disease 2019 (COVID-19). *Eur J Intern Med*. 2020; 75:107-108.
23. Changeux JP, Amoura Z, Rey FA, Miyara M. A nicotinic hypothesis for Covid-19 with preventive and therapeutic implications. *C R Biol*. 2020;343(1):33-39. Published 2020 Jun 5.
24. Wan Y, Shang J, Graham R, Baric RS, Li F. Receptor recognition by novel coronavirus from Wuhan: An analysis based on decade-long structural studies of SARS. *J Virology*. 2020; 94:e00127-20.
25. Yan R, Zhang Y, Li Y, Xia L, Guo Y, Zhou Q. Structural basis for the recognition of SARSCoV-2 by full-length human ACE2. *Science* 2020; 367:1444-8.
26. Esler M, Esler D. Can angiotensin receptor-blocking drugs perhaps be harmful in the COVID-19 pandemic?. *J Hypertens*. 2020; 38(5):781-782.
27. Versmissen J, Verdonk K, Lafeber M, et al. Angiotensin-converting enzyme-2 in SARS-CoV-2 infection: good or bad?. *J Hypertens*. 2020;38:1196-1197.
28. de Abajo FJ, Rodríguez-Martín S, Lerma V, et al. Use of renin-angiotensin-aldosterone system inhibitors and risk of COVID-19 requiring admission to hospital: a case-population study. *Lancet*. 2020;395(10238):1705-1714.
29. Reynolds HR, Adhikari S, Pulgarin C, et al. Renin-Angiotensin-Aldosterone System Inhibitors and Risk of Covid-19. *N Engl J Med*. 2020;382(25):2441-2448.
30. Kai H, Kai M. Interactions of coronaviruses with ACE2, angiotensin II, and RAS inhibitors-lessons from available evidence and insights into COVID-19. *Hypertens Res*. 2020;1-7.
31. Meng J, Xiao G, Zhang J, et al. Renin-angiotensin system inhibitors improve the clinical outcomes of COVID-19 patients with hypertension. *Emerg Microbes Infect*. 2020; 9:757-760.
32. Kreutz R, Algharably EAE, Azizi M, et al. Hypertension, the renin-angiotensin system, and the risk of lower respiratory tract infections and lung injury: implications for COVID-19. *Cardiovasc Res*. 2020;116(10):1688-1699.
33. Zhang P, Zhu L, Cai J, et al. Association of Inpatient Use of Angiotensin-Converting Enzyme Inhibitors and Angiotensin II Receptor Blockers With Mortality Among Patients With Hypertension Hospitalized With COVID-19 [published correction appears in *Circ Res*. 2020 Aug 28;127(6):e147. Rohit, Loomba [corrected to Loomba, Rohit]]. *Circ Res*. 2020;126(12):1671-1681.
34. Testa S, Prandoni P, Paoletti O, et al. Direct oral anticoagulant plasma levels' striking increase in severe COVID-19 respiratory syndrome patients treated with antiviral agents: The Cremona experience. *J Thromb Haemost*. 2020; 00: 1-4.
35. Castiglione V, Chiriaco M, Emdin M, Taddei S, Vergaro G. Statin therapy in COVID-19 infection. *Eur Heart J Cardiovasc Pharmacother*. 2020;6(4):258-259.
36. Wang Y, Jiang W, He Q, et al. Early, low-dose and short-term application of corticosteroid treatment in patients with severe COVID-19 pneumonia: single-center experience from Wuhan,

1  
2  
3 China. medRxiv. Preprint posted March 12, 2020. doi:10.1101/2020.03.06.20032342v1  
4 Available at: <https://www.medrxiv.org/node/73427.external-links.html> [Accessed 4 May 4 2020]

5 37. Russell B, Moss C, Rigg A, et al. COVID-19 and treatment with NSAIDs and corticosteroids:  
6 should we be limiting their use in the clinical setting?. *Ecancermedicalsecience*. 2020;14:1023.  
7

8 38. Hernandez AV, Roman YM, Pasupuleti V, et al. Hydroxychloroquine or Chloroquine for  
9 Treatment or Prophylaxis of COVID-19: A Living Systematic Review *Ann Intern Med*.  
10 2020;10.7326/M20-2496.

11 39. Simons FE, Simons KJ. Histamine and H1-antihistamines: celebrating a century of  
12 progress. *J Allergy Clin Immunol*. 2011; 128: 1139-1150.  
13

14 40. Freedberg DE, Conigliaro J, Wang TC, et al. Famotidine use is associated with improved  
15 clinical outcomes in hospitalized COVID-19 patients: A propensity score matched retrospective  
16 cohort study. *Gastroenterology*. 2020; S0016-5085.

17 41. Salem ML, El-Hennawy D. The possible beneficial adjuvant effect of influenza vaccine to  
18 minimize the severity of COVID-19. *Med Hypotheses* 2020;140:109752.  
19  
20  
21  
22  
23  
24  
25  
26  
27  
28  
29  
30  
31  
32  
33  
34  
35  
36  
37  
38  
39  
40  
41  
42  
43  
44  
45  
46  
47  
48  
49  
50  
51  
52  
53  
54  
55  
56  
57  
58  
59  
60



## TABLES

Table 1. Incidence of PCR-confirmed COVID-19 cases according to baseline demographical and clinical characteristics (comorbidities/medications) in the total study cohort (N=79,083). Tarragona region (Southern Catalonia, Spain), 01/03/2020-23/05/2020.

| Characteristic                     | Study population<br>(N=79083)<br>n (%) | PCR-confirmed COVID-19 cases (n=380) |                          |
|------------------------------------|----------------------------------------|--------------------------------------|--------------------------|
|                                    |                                        | Univariate analysis<br>n (%) p-value | Incidence rate           |
| <b>Sociodemographical</b>          |                                        |                                      |                          |
| <b>Age:</b> 50-64 yrs              | 42684 (54.0)                           | 101 (26.6) <0.001                    | 236.6 (193.6-288.7)      |
| 65-79 yrs                          | 26013 (32.9)                           | 95 (25.0)                            | 365.2 (295.4-452.9)      |
| ≥80 yrs                            | 10386 (13.1)                           | 184 (48.4)                           | 1771.6 (1527.1-2055.1)   |
| <b>Sex</b> Men                     | 37626 (47.6)                           | 158 (41.6) 0.019                     | 419.9 (358.6-491.7)      |
| Women                              | 41457 (52.4)                           | 222 (58.4)                           | 535.5 (464.8-616.4)      |
| <b>Community-dwelling</b>          | 77676 (98.2)                           | 220 (57.9) <0.001                    | 283.2 (245.8-326.0)      |
| <b>Nursing-home residence</b>      | 1407 (1.8)                             | 160 (42.1)                           | 11371.7 (9711.4-13316.3) |
| <b>Comorbidities</b>               |                                        |                                      |                          |
| <b>Neurological disease</b>        | 2317 (2.9)                             | 66 (17.4) <0.001                     | 2848.5 (2236.1-3617.6)   |
| <b>Renal disease</b>               | 4476 (5.7)                             | 49 (12.9) <0.001                     | 1094.7 (812.3-1445.0)    |
| <b>Cancer</b>                      | 6630 (8.4)                             | 49 (12.9) 0.001                      | 739.1 (548.4-975.6)      |
| <b>Rheumatic disease</b>           | 872 (1.1)                              | 2 (0.5) 0.281                        | 229.4 (27.8-828.0)       |
| <b>Respiratory disease</b>         | 7272 (9.2)                             | 63 (16.6) <0.001                     | 866.3 (667.1-1126.2)     |
| <b>Cardiac disease</b>             | 13435 (17.0)                           | 123 (32.4) <0.001                    | 915.5 (762.6-1098.6)     |
| <b>Atrial fibrillation</b>         | 3786 (4.8)                             | 55 (14.5) <0.001                     | 1452.7 (1077.9-1917.6)   |
| <b>Liver disease</b>               | 1465 (1.9)                             | 8 (2.1) 0.714                        | 546.1 (235.4-1075.8)     |
| <b>Diabetes</b>                    | 13317 (16.8)                           | 102 (26.8) <0.001                    | 765.9 (626.5-934.4)      |
| <b>Hypertension</b>                | 34945 (44.2)                           | 223 (58.7) <0.001                    | 638.1 (553.9-734.5)      |
| <b>Hypercholesterolemia</b>        | 27314 (34.5)                           | 133 (35.0) 0.850                     | 486.9 (411.0-576.5)      |
| <b>Obesity</b>                     | 21678 (27.4)                           | 96 (25.3) 0.347                      | 442.8 (362.2-540.3)      |
| <b>Smoking</b>                     | 12750 (16.1)                           | 27 (7.1) <0.001                      | 211.8 (139.6-309.2)      |
| <b>Chronic medications use</b>     |                                        |                                      |                          |
| <b>Diuretics</b>                   | 8481 (10.7)                            | 111 (29.2) <0.001                    | 1308.8 (1090.2-1570.6)   |
| <b>Beta blockers</b>               | 9571 (12.1)                            | 68 (17.9) 0.001                      | 710.5 (557.7-902.3)      |
| <b>ACEIs</b>                       | 16419 (20.8)                           | 92 (24.2) 0.097                      | 560.3 (453.3-694.8)      |
| <b>ARBs</b>                        | 8869 (11.2)                            | 39 (10.3) 0.556                      | 439.7 (314.0-598.0)      |
| <b>Calcium channel blockers</b>    | 6490 (8.2)                             | 52 (13.7) <0.001                     | 801.2 (594.5-1057.6)     |
| <b>Statins</b>                     | 16134 (20.4)                           | 69 (18.2) 0.277                      | 427.7 (335.7-543.1)      |
| <b>Oral anticoagulants</b>         | 3912 (4.9)                             | 46 (12.1) <0.001                     | 1175.9 (857.2-1575.7)    |
| <b>Antiplatelet drugs</b>          | 9154 (11.6)                            | 86 (22.6) <0.001                     | 939.5 (760.0-1165.0)     |
| <b>Insulin</b>                     | 3042 (3.8)                             | 39 (10.3) <0.001                     | 1282.1 (915.4-1743.6)    |
| <b>Oral antidiabetic drugs</b>     | 10585 (13.4)                           | 69 (18.2) 0.006                      | 651.9 (511.7-827.9)      |
| <b>Inhaled respiratory drugs</b>   | 6293 (8.0)                             | 61 (16.1) <0.001                     | 969.3 (746.4-1260.1)     |
| <b>Antineoplastic agents</b>       | 1614 (2.0)                             | 8 (2.1) 0.929                        | 495.7 (213.6-976.5)      |
| <b>Systemic corticosteroids</b>    | 1252 (1.6)                             | 5 (1.3) 0.676                        | 399.4 (129.4-930.5)      |
| <b>NSADs</b>                       | 4321 (5.5)                             | 12 (3.2) 0.047                       | 277.7 (143.6-486.0)      |
| <b>Chloroquine</b>                 | 168 (0.2)                              | 0 (0.0) 0.367                        | 0 (-)                    |
| <b>Antihistamines</b>              | 3264 (4.1)                             | 7 (1.8) 0.025                        | 214.5 (86.0-446.1)       |
| <b>Proton-Pump Inhibitors</b>      | 17931 (22.7)                           | 142 (37.4) <0.001                    | 791.9 (668.4-937.6)      |
| <b>Benzodiazepines</b>             | 13046 (16.5)                           | 96 (25.3) <0.001                     | 735.9 (601.9-897.7)      |
| <b>Vaccination's history</b>       |                                        |                                      |                          |
| <b>Flu vaccine in prior autumn</b> | 22606 (28.6)                           | 205 (53.9) <0.001                    | 906.8 (787.1-1043.8)     |
| <b>Pneumococcal vaccinated</b>     | 26183 (33.1)                           | 213 (56.1) <0.001                    | 813.5 (706.1-936.3)      |

NOTE: P-values in univariate analysis were calculated by chi-squared, or Fisher's test as appropriate, comparing percentages in the study population vs COVID-19 cases; IR denotes incidence rates per 100,000 persons period (12 weeks); CIs denotes confidence intervals for incidence rates and were calculated assuming a Poisson distribution for uncommon events.

Table 2. Cox regression analyses assessing unadjusted and adjusted risks to suffer PCR-confirmed COVID-19 in the total study cohort (N=79,083). Tarragona region (Southern Catalonia, Spain) from 01/03/2020 to 23/05/2020.

| Characteristic                     | LC-COVID-19 cases (n=349)         |                                 |
|------------------------------------|-----------------------------------|---------------------------------|
|                                    | Unadjusted<br>HR (95% CI) p-value | Adjusted<br>HR (95% CI) p-value |
| <b>Sociodemographical</b>          |                                   |                                 |
| <b>Age (continuous yrs)</b>        | 1.07 (1.07-1.08) <0.001           | 1.02 (1.01-1.03) 0.002          |
| <b>Sex: women</b>                  | 1.28 (1.04-1.57) 0.019            | 0.95 (0.76-1.18) 0.624          |
| <b>Nursing-home residence</b>      | 42.14 (34.37-51.66) <0.001        | 21.83 (16.66-28.61) <0.001      |
| <b>Comorbidities</b>               |                                   |                                 |
| <b>Neurological disease</b>        | 7.03 (5.39-9.16) <0.001           | 1.31 (0.97-1.77) 0.074          |
| <b>Renal disease</b>               | 2.47 (1.83-3.34) <0.001           | 0.91 (0.66-1.26) 0.556          |
| <b>Cancer</b>                      | 1.62 (1.20-2.19) 0.002            | 1.17 (0.86-1.60) 0.315          |
| <b>Rheumatic disease</b>           | 0.47 (0.12-1.90) 0.293            | 0.54 (0.13-2.19) 0.386          |
| <b>Respiratory disease</b>         | 1.97 (1.50-2.58) <0.001           | 1.29 (0.89-1.87) 0.184          |
| <b>Cardiac disease</b>             | 2.34 (1.89-2.90) <0.001           | 1.04 (0.80-1.34) 0.790          |
| <b>Atrial fibrillation</b>         | 3.38 (2.54-4.50) <0.001           | 1.17 (0.74-1.84) 0.514          |
| <b>Liver disease</b>               | 1.14 (0.57-2.30) 0.712            | 1.16 (0.57-2.35) 0.684          |
| <b>Diabetes</b>                    | 1.81 (1.45-2.27) <0.001           | 1.10 (0.73-1.65) 0.646          |
| <b>Hypertension</b>                | 1.80 (1.46-2.20) <0.001           | 0.98 (0.74-1.29) 0.869          |
| <b>Hypercholesterolemia</b>        | 1.02 (0.83-1.26) 0.851            | 0.88 (0.70-1.11) 0.269          |
| <b>Obesity</b>                     | 0.89 (0.71-1.13) 0.344            | 0.87 (0.68-1.11) 0.262          |
| <b>Smoking</b>                     | 0.40 (0.27-0.59) <0.001           | 0.62 (0.41-0.93) 0.022          |
| <b>Chronic medications use</b>     |                                   |                                 |
| <b>Diuretics</b>                   | 3.45 (2.76-4.30) <0.001           | 1.35 (1.04-1.76) 0.026          |
| <b>Beta blockers</b>               | 1.59 (1.22-2.06) 0.001            | 0.96 (0.72-1.29) 0.790          |
| <b>ACEIs</b>                       | 1.22 (0.96-1.54) 0.098            | 0.85 (0.65-1.13) 0.260          |
| <b>ARBs</b>                        | 0.90 (0.65-1.26) 0.552            | 0.68 (0.47-0.99) 0.046          |
| <b>Calcium channel blockers</b>    | 1.77 (1.32-2.38) <0.001           | 1.31 (0.95-1.79) 0.096          |
| <b>Statins</b>                     | 0.87 (0.67-1.12) 0.276            | 0.82 (0.60-1.11) 0.200          |
| <b>Oral anticoagulants</b>         | 2.65 (1.95-3.61) <0.001           | 1.26 (0.76-2.07) 0.371          |
| <b>Antiplatelet drugs</b>          | 2.24 (1.76-2.85) <0.001           | 1.35 (1.00-1.81) 0.051          |
| <b>Insulin</b>                     | 2.87 (2.06-3.99) <0.001           | 1.47 (0.98-2.21) 0.065          |
| <b>Oral antidiabetic drugs</b>     | 1.44 (1.11-1.86) 0.007            | 1.05 (0.69-1.59) 0.823          |
| <b>Inhaled respiratory drugs</b>   | 2.22 (1.69-2.92) <0.001           | 1.24 (0.84-1.81) 0.275          |
| <b>Antineoplastic agents</b>       | 1.03 (0.51-2.08) 0.929            | 1.06 (0.51-2.20) 0.876          |
| <b>Systemic corticosteroids</b>    | 0.83 (0.34-2.00) 0.677            | 0.57 (0.23-1.40) 0.218          |
| <b>NSADs</b>                       | 0.57 (0.32-1.00) 0.051            | 1.04 (0.58-1.87) 0.901          |
| <b>Antihistamines</b>              | 0.44 (0.21-0.92) 0.029            | 0.47 (0.22-1.01) 0.052          |
| <b>Proton-Pump Inhibitors</b>      | 2.04 (1.66-2.51) <0.001           | 0.93 (0.72-1.19) 0.557          |
| <b>Benzodiazepines</b>             | 1.72 (1.36-2.16) <0.001           | 1.25 (0.98-1.60) 0.072          |
| <b>Vaccination's history</b>       |                                   |                                 |
| <b>Flu vaccine in prior autumn</b> | 2.93 (2.40-3.59) <0.001           | 1.02 (0.79-1.32) 0.878          |
| <b>Pneumococcal vaccination</b>    | 2.58 (2.11-3.16) <0.001           | 1.02 (0.78-1.33) 0.904          |

NOTE: HRs denotes Hazard ratios, and were calculated for those who had the condition as compared with those who had not the condition. In adjusted analysis the HRs were adjusted for age (continuous years), sex, residence, comorbidities/underlying conditions and chronic medications use. CIs denote confidence intervals.

Table 3. Incidence of PCR-confirmed COVID-19 cases according to baseline demographical and clinical characteristics (comorbidities/medications) in subgroup analysis restricted to community-dwelling individuals (N=77,676). Tarragona region (Southern Catalonia, Spain), 01/03/2020-23/05/2020.

| Characteristic                     | Study population<br>(N=77676)<br>n (%) | PCR-confirmed COVID-19 cases (n=220) |                      |
|------------------------------------|----------------------------------------|--------------------------------------|----------------------|
|                                    |                                        | Univariate analysis<br>n (%) p-value | Incidence rate       |
| <b>Sociodemographical</b>          |                                        |                                      |                      |
| <b>Age:</b> 50-64 yrs              | 42533 (54.8)                           | 99 (45.0) <0.001                     | 232.8 (190.4-284.0)  |
| 65-79 yrs                          | 25713 (33.1)                           | 72 (32.7)                            | 280.0 (219.8-355.6)  |
| ≥80 yrs                            | 9430 (12.1)                            | 49 (22.3)                            | 519.6 (385.6-685.9)  |
| <b>Sex</b> Men                     | 37145 (47.8)                           | 108 (49.1) 0.706                     | 290.8 (237.8-354.7)  |
| Women                              | 40531 (52.2)                           | 112 (50.9)                           | 276.3 (230.2-331.6)  |
| <b>Comorbidities</b>               |                                        |                                      |                      |
| <b>Neurological disease</b>        | 1951 (2.5)                             | 11 (5.0) 0.018                       | 563.8 (281.3-1009.2) |
| <b>Renal disease</b>               | 4240 (5.5)                             | 26 (11.8) <0.001                     | 613.2 (400.4-901.4)  |
| <b>Cancer</b>                      | 6463 (8.3)                             | 32 (14.5) 0.001                      | 495.1 (334.2-708.0)  |
| <b>Rheumatic disease</b>           | 860 (1.1)                              | 1 (0.5) 0.354                        | 116.3 (2.9-647.7)    |
| <b>Respiratory disease</b>         | 7075 (9.1)                             | 47 (21.4) <0.001                     | 664.3 (484.3-890.2)  |
| <b>Cardiac disease</b>             | 12925 (16.6)                           | 68 (30.9) <0.001                     | 526.1 (413.0-668.2)  |
| <b>Atrial fibrillation</b>         | 3561 (4.6)                             | 26 (11.8) <0.001                     | 730.1 (476.8-1073.3) |
| <b>Liver disease</b>               | 1438 (1.9)                             | 6 (2.7) 0.334                        | 417.2 (153.1-909.6)  |
| <b>Diabetes</b>                    | 12926 (16.6)                           | 50 (22.7) 0.015                      | 386.8 (287.0-510.6)  |
| <b>Hypertension</b>                | 33996 (43.8)                           | 112 (50.9) 0.032                     | 329.5 (274.4-395.3)  |
| <b>Hypercholesterolemia</b>        | 26766 (34.5)                           | 74 (33.6) 0.797                      | 276.5 (217.0-351.1)  |
| <b>Obesity</b>                     | 21344 (27.5)                           | 57 (25.9) 0.602                      | 267.1 (205.6-347.2)  |
| <b>Smoking</b>                     | 12640 (16.3)                           | 19 (8.6) 0.002                       | 150.3 (90.5-234.5)   |
| <b>Chronic medications use</b>     |                                        |                                      |                      |
| <b>Diuretics</b>                   | 8028 (10.3)                            | 51 (23.2) <0.001                     | 635.3 (471.4-838.6)  |
| <b>Beta blockers</b>               | 9312 (12.0)                            | 40 (18.2) 0.005                      | 429.6 (306.7-584.2)  |
| <b>ACEIs</b>                       | 16031 (20.6)                           | 41 (18.6) 0.462                      | 255.8 (182.6-347.8)  |
| <b>ARBs</b>                        | 8709 (11.2)                            | 29 (13.2) 0.354                      | 333.0 (223.1-479.5)  |
| <b>Calcium channel blockers</b>    | 6316 (8.1)                             | 27 (12.3) 0.024                      | 427.5 (281.7-624.1)  |
| <b>Statins</b>                     | 15911 (20.5)                           | 47 (21.4) 0.746                      | 295.4 (215.3-395.8)  |
| <b>Oral anticoagulants</b>         | 3741 (4.8)                             | 27 (12.3) <0.001                     | 721.7 (475.6-1053.7) |
| <b>Antiplatelet drugs</b>          | 8810 (11.3)                            | 40 (18.2) 0.001                      | 454.0 (324.2-617.5)  |
| <b>Insulin</b>                     | 2904 (3.7)                             | 20 (9.1) <0.001                      | 688.7 (420.8-1060.6) |
| <b>Oral antidiabetic drugs</b>     | 10352 (13.3)                           | 34 (15.5) 0.353                      | 328.4 (228.9-456.5)  |
| <b>Inhaled respiratory drugs</b>   | 6095 (7.8)                             | 42 (19.1) <0.001                     | 689.1 (492.0-937.2)  |
| <b>Antineoplastic agents</b>       | 1581 (2.0)                             | 2 (0.9) 0.236                        | 126.5 (15.3-456.7)   |
| <b>Systemic corticosteroids</b>    | 1216 (1.6)                             | 5 (2.3) 0.397                        | 411.2 (133.2-958.1)  |
| <b>NSADs</b>                       | 4305 (5.5)                             | 12 (5.5) 0.955                       | 278.7 (144.1-487.8)  |
| <b>Antihistamines</b>              | 3221 (4.1)                             | 6 (2.7) 0.290                        | 186.3 (68.4-406.1)   |
| <b>Proton-Pump Inhibitors</b>      | 17315 (22.3)                           | 74 (33.6) <0.001                     | 427.4 (335.5-542.8)  |
| <b>Benzodiazepines</b>             | 12654 (16.3)                           | 49 (22.3) 0.016                      | 387.2 (287.3-511.1)  |
| <b>Vaccination's history</b>       |                                        |                                      |                      |
| <b>Flu vaccine in prior autumn</b> | 21570 (27.8)                           | 70 (31.8) 0.179                      | 324.5 (254.8-412.1)  |
| <b>Pneumococcal vaccinated</b>     | 25224 (32.5)                           | 100 (45.5) <0.001                    | 396.4 (324.3-483.7)  |

NOTE: P-values in univariate analysis were calculated by chi-squared, or Fisher's test as appropriate, comparing percentages in the study population vs COVID-19 cases; IR denotes incidence rates per 100.000 persons period (12 weeks); CIs denotes confidence intervals for incidence rates and were calculated assuming a Poisson distribution for uncommon events.

Table 4. Cox regression analyses assessing unadjusted and adjusted risks to suffer PCR-confirmed COVID-19 among community-dwelling individuals (N=77,676). Tarragona region (Southern Catalonia, Spain), 01/03/2020-23/05/2020.

| Characteristic                 | LC-COVID-19 cases (n=201)         |                                 |
|--------------------------------|-----------------------------------|---------------------------------|
|                                | Unadjusted<br>HR (95% CI) p-value | Adjusted<br>HR (95% CI) p-value |
| <b>Sociodemographical</b>      |                                   |                                 |
| Age (continuous yrs)           | 1.03 (1.02-1.04) <0.001           | 1.01 (0.99-1.02) 0.573          |
| Sex: women                     | 0.95 (0.73-1.24) 0.708            | 0.97 (0.73-1.28) 0.807          |
| <b>Comorbidities</b>           |                                   |                                 |
| Neurological disease           | 2.04 (1.12-3.75) 0.021            | 1.06 (0.56-2.01) 0.857          |
| Renal disease                  | 2.32 (1.54-3.50) <0.001           | 1.22 (0.77-1.94) 0.398          |
| Cancer                         | 1.88 (1.29-2.73) 0.001            | 1.52 (1.03-2.24) 0.035          |
| Rheumatic disease              | 0.41 (0.06-2.91) 0.371            | 0.41 (0.06-2.97) 0.375          |
| Respiratory disease            | 2.72 (1.97-3.75) <0.001           | 1.82 (1.08-3.07) 0.025          |
| Cardiac disease                | 2.24 (1.69-2.99) <0.001           | 1.53 (1.06-2.19) 0.021          |
| Atrial fibrillation            | 2.79 (1.86-4.21) <0.001           | 1.06 (0.48-2.33) 0.882          |
| Liver disease                  | 1.49 (0.66-3.35) 0.336            | 1.24 (0.54-2.83) 0.608          |
| Diabetes                       | 1.47 (1.08-2.02) 0.016            | 1.26 (0.70-2.28) 0.441          |
| Hypertension                   | 1.33 (1.02-1.74) 0.034            | 1.06 (0.72-1.55) 0.785          |
| Hypercholesterolemia           | 0.96 (0.73-1.28) 0.798            | 0.88 (0.64-1.20) 0.405          |
| Obesity                        | 0.92 (0.68-1.25) 0.599            | 0.75 (0.54-1.03) 0.076          |
| Smoking                        | 0.49 (0.30-0.78) 0.003            | 0.49 (0.30-0.80) 0.004          |
| <b>Chronic medications use</b> |                                   |                                 |
| Diuretics                      | 2.62 (1.92-3.58) <0.001           | 1.54 (1.04-2.27) 0.031          |
| Beta blockers                  | 1.63 (1.16-2.30) 0.005            | 1.02 (0.69-1.52) 0.909          |
| ACEIs                          | 0.88 (0.63-1.24) 0.462            | 0.66 (0.44-0.99) 0.046          |
| ARBs                           | 1.20 (0.81-1.78) 0.356            | 0.75 (0.47-1.19) 0.222          |
| Calcium channel blockers       | 1.58 (1.06-2.36) 0.026            | 1.21 (0.78-1.87) 0.395          |
| Statins                        | 1.05 (0.76-1.46) 0.747            | 0.72 (0.49-1.06) 0.094          |
| Oral anticoagulants            | 2.77 (1.85-4.14) <0.001           | 1.58 (0.71-3.48) 0.261          |
| Antiplatelet drugs             | 1.74 (1.23-2.45) 0.002            | 1.30 (0.84-2.02) 0.243          |
| Insulin                        | 2.58 (1.63-4.08) <0.001           | 1.79 (1.00-3.21) 0.059          |
| Oral antidiabetic drugs        | 1.19 (0.82-1.71) 0.356            | 0.73 (0.40-1.32) 0.295          |
| Inhaled respiratory drugs      | 2.78 (1.99-3.89) <0.001           | 1.41 (0.81-2.45) 0.225          |
| Antineoplastic agents          | 0.44 (0.11-1.78) 0.250            | 0.36 (0.09-1.49) 0.159          |
| Systemic corticosteroids       | 1.46 (0.60-3.55) 0.400            | 1.03 (0.41-2.58) 0.945          |
| NSADs                          | 0.99 (0.55-1.76) 0.959            | 1.17 (0.65-2.12) 0.600          |
| Antihistamines                 | 0.65 (0.29-1.46) 0.294            | 0.51 (0.23-1.16) 0.109          |
| Proton-Pump Inhibitors         | 1.77 (1.34-2.34) <0.001           | 1.11 (0.79-1.57) 0.555          |
| Benzodiazepines                | 1.48 (1.07-2.03) 0.017            | 1.26 (0.90-1.76) 0.186          |
| <b>Vaccination's history</b>   |                                   |                                 |
| Flu vaccine in prior autumn    | 1.21 (0.91-1.61) 0.182            | 0.63 (0.44-0.91) 0.012          |
| Pneumococcal vaccination       | 1.73 (1.33-2.26) <0.001           | 1.29 (0.86-1.92) 0.214          |

NOTE: HRs denotes Hazard ratios, and were calculated for those who had the condition as compared with those who had not the condition. In multivariable-adjusted analysis, HRs were adjusted for age (continuous years), sex, residence, comorbidities/underlying conditions and chronic medications use. CIs denote confidence intervals.

Table 5. Univariate and multivariate analyses on laboratory-confirmed COVID-19 cases according to baseline demographical and clinical characteristics (comorbidities/medications) in subgroup analysis restricted to nursing-home residents (N=1407). Tarragona region (Southern Catalonia, Spain) from 01/03/2020 to 23/05/2020.

| Characteristic                     | Study population<br>(N=1407)<br>n (%) | PCR-confirmed COVID-19 cases (n=160) |                                              |
|------------------------------------|---------------------------------------|--------------------------------------|----------------------------------------------|
|                                    |                                       | Univariate analysis<br>n (%) p value | Multivariate analysis<br>HR (95% CI) p value |
| <b>Sociodemographical</b>          |                                       |                                      |                                              |
| <b>Age:</b> 50-64 yrs              | 151 (10.7)                            | 2 (1.3) <0.001                       | 1.00 (reference)                             |
| 65-79 yrs                          | 300 (21.3)                            | 23 (14.4)                            | 6.66 (1.53-29.02) 0.012                      |
| ≥80 yrs                            | 956 (67.9)                            | 135 (84.4)                           | 13.16 (3.09-56.00) <0.001                    |
| <b>Sex:</b> Men                    | 481 (34.2)                            | 50 (31.3) 0.406                      | 1.00 (reference)                             |
| Women                              | 926 (65.8)                            | 110 (68.8)                           | 0.85 (0.59-1.24) 0.402                       |
| <b>Comorbidities</b>               |                                       |                                      |                                              |
| <b>Neurological disease</b>        | 366 (26.0)                            | 55 (34.4) 0.010                      | 1.25 (0.89-1.76) 0.193                       |
| <b>Renal disease</b>               | 236 (16.8)                            | 23 (14.4) 0.388                      | 0.68 (0.43-1.08) 0.104                       |
| <b>Cancer</b>                      | 167 (11.9)                            | 17 (10.6) 0.605                      | 0.74 (0.43-1.26) 0.264                       |
| <b>Rheumatic disease</b>           | 12 (0.9)                              | 1 (0.6) 0.739                        | 0.86 (0.12-6.43) 0.885                       |
| <b>Respiratory disease</b>         | 197 (14.0)                            | 16 (10.0) 0.121                      | 0.72 (0.39-1.31) 0.280                       |
| <b>Cardiac disease</b>             | 510 (36.2)                            | 55 (34.4) 0.601                      | 0.76 (0.52-1.09) 0.137                       |
| <b>Atrial fibrillation</b>         | 225 (16.0)                            | 29 (18.1) 0.434                      | 1.25 (0.71-2.20) 0.436                       |
| <b>Liver disease</b>               | 27 (1.9)                              | 2 (1.3) 0.512                        | 0.70 (0.17-2.88) 0.618                       |
| <b>Diabetes</b>                    | 391 (27.8)                            | 52 (32.5) 0.158                      | 1.08 (0.63-1.85) 0.786                       |
| <b>Hypertension</b>                | 949 (67.4)                            | 111 (69.4) 0.581                     | 0.89 (0.60-1.33) 0.562                       |
| <b>Hypercholesterolemia</b>        | 548 (38.9)                            | 59 (36.9) 0.568                      | 0.90 (0.64-1.26) 0.525                       |
| <b>Obesity</b>                     | 334 (23.7)                            | 39 (24.4) 0.841                      | 1.10 (0.75-1.61) 0.617                       |
| <b>Smoking</b>                     | 8 (5.0)                               | 110 (7.8) 0.158                      | 1.47 (0.68-3.17) 0.323                       |
| <b>Chronic medications use</b>     |                                       |                                      |                                              |
| <b>Diuretics</b>                   | 453 (32.2)                            | 60 (37.5) 0.127                      | 1.19 (0.83-1.70) 0.342                       |
| <b>Beta blockers</b>               | 259 (18.4)                            | 28 (17.5) 0.753                      | 0.90 (0.57-1.41) 0.642                       |
| <b>ACEIs</b>                       | 388 (27.6)                            | 51 (31.9) 0.196                      | 1.01 (0.69-1.47) 0.981                       |
| <b>ARBs</b>                        | 160 (11.4)                            | 10 (6.3) 0.030                       | 0.45 (0.23-0.90) 0.023                       |
| <b>Calcium channel blockers</b>    | 174 (12.4)                            | 25 (15.6) 0.184                      | 1.34 (0.85-2.12) 0.214                       |
| <b>Statins</b>                     | 223 (15.8)                            | 22 (13.8) 0.440                      | 0.99 (0.59-1.64) 0.964                       |
| <b>Oral anticoagulants</b>         | 171 (12.2)                            | 19 (11.9) 0.909                      | 0.81 (0.41-1.59) 0.534                       |
| <b>Antiplatelet drugs</b>          | 344 (24.4)                            | 46 (28.7) 0.179                      | 1.30 (0.85-1.98) 0.227                       |
| <b>Insulin</b>                     | 138 (9.8)                             | 19 (11.9) 0.350                      | 1.05 (0.59-1.86) 0.880                       |
| <b>Oral antidiabetic drugs</b>     | 233 (16.6)                            | 35 (21.9) 0.055                      | 1.56 (0.88-2.77) 0.131                       |
| <b>Inhaled respiratory drugs</b>   | 198 (14.1)                            | 19 (11.9) 0.396                      | 0.93 (0.53-1.64) 0.808                       |
| <b>Antineoplastic agents</b>       | 33 (2.3)                              | 6 (3.8) 0.212                        | 3.27 (1.34-7.94) 0.009                       |
| <b>Systemic corticosteroids</b>    | 36 (2.6)                              | 0 (-) 0.029                          | NA (-) -                                     |
| <b>NSADs</b>                       | 16 (1.1)                              | 0 (-) 0.150                          | NA (-) -                                     |
| <b>Antihistamines</b>              | 43 (3.1)                              | 1 (0.6) 0.058                        | 0.21 (0.03-1.54) 0.125                       |
| <b>Proton-Pump Inhibitors</b>      | 616 (4.8)                             | 68 (42.5) 0.729                      | 0.82 (0.57-1.18) 0.286                       |
| <b>Benzodiazepines</b>             | 392 (27.9)                            | 47 (29.4) 0.650                      | 1.02 (0.72-1.46) 0.911                       |
| <b>Vaccination's history</b>       |                                       |                                      |                                              |
| <b>Flu vaccine in prior autumn</b> | 1036 (73.6)                           | 135 (84.4) 0.001                     | 1.61 (0.98-2.59) 0.071                       |
| <b>Pneumococcal vaccination</b>    | 959 (68.2)                            | 1130.6) 0.477                        | 0.77 (0.53-1.10) 0.148                       |

NOTE: p-values in univariate analysis were calculated by chi-squared (or Fisher's test as appropriate) comparing percentages in the study population vs COVID-19 cases; HR denotes multivariable-adjusted Hazard ratios (Cox regression) calculated for those who had the condition as compared with those who had not the condition, being adjusted by age (continuous), sex, pre-existing comorbidities and medications use.

1  
2  
3  
4  
5  
6  
7  
8  
9  
10  
11  
12  
13  
14  
15  
16  
17  
18  
19  
20  
21  
22  
23  
24  
25  
26  
27  
28  
29  
30  
31  
32  
33  
34  
35  
36  
37  
38  
39  
40  
41  
42  
43  
44  
45  
46  
47  
48  
49  
50  
51  
52  
53  
54  
55  
56  
57  
58  
59  
60

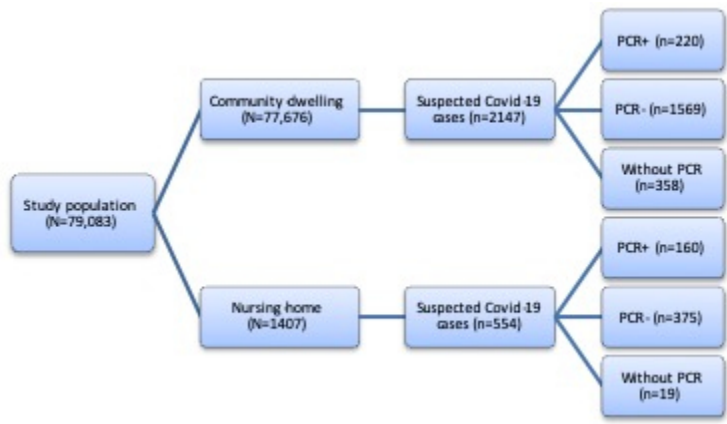

FIGURE 1. Flow diagram of the study.

**APPENDIX. Criteria used to identify comorbidities and active medications in the study population.**

| Comorbidities and underlying conditions with ICD-10 codes [International Classification of Diseases, 10th Revision]                                                   |                                                          |
|-----------------------------------------------------------------------------------------------------------------------------------------------------------------------|----------------------------------------------------------|
| <b>Neurological disease:</b><br>Dementia<br>Ictus                                                                                                                     | F01-F03<br>I63, I61                                      |
| <b>Chronic renal failure</b>                                                                                                                                          | N18-N19                                                  |
| <b>Cancer</b> (solid organ or haematological neoplasia) in past 5 years                                                                                               | C00-C97                                                  |
| <b>Rheumatologic disease:</b><br>Rheumatoid arthritis, enteropathic arthropathies and juvenile arthritis<br>Systemic lupus erythematosus                              | M05-M09<br>M32                                           |
| <b>Chronic pulmonary/respiratory disease:</b><br>Chronic bronchitis/emphysema<br>Asthma<br>Other chronic pulmonary diseases                                           | J41-J44<br>J45-J46<br>P27, E84, J47                      |
| <b>Chronic heart disease:</b><br>Congestive heart failure<br>Coronary artery disease<br>Other chronic heart diseases                                                  | I50<br>I20-I22, I25<br>I05-I08, I11, I35-I37, I42, I51.7 |
| <b>Atrial Fibrillation</b>                                                                                                                                            | I48                                                      |
| <b>Chronic liver disease:</b><br>Chronic viral hepatitis<br>Cirrhosis<br>Alcoholic hepatitis                                                                          | B18<br>K74<br>K70                                        |
| <b>Diabetes mellitus</b>                                                                                                                                              | E10-E14                                                  |
| <b>Hypertension</b>                                                                                                                                                   | I10, I11, I12 o I15                                      |
| <b>Hypercholesterolemia</b>                                                                                                                                           | E78                                                      |
| <b>Obesity</b>                                                                                                                                                        | E66                                                      |
| <b>Smoking</b>                                                                                                                                                        | F17                                                      |
| Drugs identified in the patient treatment with codes of the Anatomical, Therapeutic, and Chemical classification system (ATC codes) of the World Health Organization: |                                                          |
| <b>Diuretics</b>                                                                                                                                                      | C03                                                      |
| <b>Beta blockers</b>                                                                                                                                                  | C07                                                      |
| <b>Angiotensin converter enzyme inhibitors (ACEIs)</b>                                                                                                                | C09A, C09B                                               |
| <b>Angiotensin II receptor blockers (ARBs)</b>                                                                                                                        | C09C, C09D                                               |
| <b>Calcium channel blockers</b>                                                                                                                                       | C08CA                                                    |
| <b>Statins</b>                                                                                                                                                        | C10AA                                                    |
| <b>Oral anticoagulant drugs</b>                                                                                                                                       | B01AA, B01AE, B01AF                                      |
| <b>Antiplatelet drugs</b>                                                                                                                                             | B01AC                                                    |
| <b>Insulin</b>                                                                                                                                                        | A10A                                                     |
| <b>Oral antidiabetic drugs</b>                                                                                                                                        | A10B                                                     |
| <b>Inhaled respiratory drugs</b>                                                                                                                                      | R03A, R03B                                               |
| <b>Antineoplastic agents</b>                                                                                                                                          | L01, L02B, L03, L04                                      |
| <b>Corticosteroids for systemic use</b>                                                                                                                               | H02A                                                     |
| <b>Non-steroids anti inflammatory drugs (NSADs)</b>                                                                                                                   | M01A                                                     |
| <b>Chloroquine/Hydroxychloroquine</b>                                                                                                                                 | P01BA01, P01BA02                                         |
| <b>Antihistamines for systemic use</b>                                                                                                                                | R06                                                      |
| <b>Proton pump inhibitors</b>                                                                                                                                         | A02BC                                                    |
| <b>Benzodiazepines</b>                                                                                                                                                | N05BA, N05CD, N05CF                                      |

STROBE Statement—Checklist of items that should be included in reports of *cohort studies*

|                              | Item No | Recommendation                                                                                                                                                                                                                                                                                                                                                          |
|------------------------------|---------|-------------------------------------------------------------------------------------------------------------------------------------------------------------------------------------------------------------------------------------------------------------------------------------------------------------------------------------------------------------------------|
| <b>Title and abstract</b>    | 1       | (a) Indicate the study's design with a commonly used term in the title or the abstract (p. 4) ✓<br>(b) Provide in the abstract an informative and balanced summary of what was done and what was found (p. 4) ✓                                                                                                                                                         |
| <b>Introduction</b>          |         |                                                                                                                                                                                                                                                                                                                                                                         |
| Background/rationale         | 2       | Explain the scientific background and rationale for the investigation being reported (p. 6) ✓                                                                                                                                                                                                                                                                           |
| Objectives                   | 3       | State specific objectives, including any prespecified hypotheses (p. 6) ✓                                                                                                                                                                                                                                                                                               |
| <b>Methods</b>               |         |                                                                                                                                                                                                                                                                                                                                                                         |
| Study design                 | 4       | Present key elements of study design early in the paper (p. 6) ✓                                                                                                                                                                                                                                                                                                        |
| Setting                      | 5       | Describe the setting, locations, and relevant dates, including periods of recruitment, exposure, follow-up, and data collection (p. 6-7) ✓                                                                                                                                                                                                                              |
| Participants                 | 6       | (a) Give the eligibility criteria, and the sources and methods of selection of participants. Describe methods of follow-up (p. 6) ✓<br>(b) For matched studies, give matching criteria and number of exposed and unexposed NOT APPLICABLE □                                                                                                                             |
| Variables                    | 7       | Clearly define all outcomes, exposures, predictors, potential confounders, and effect modifiers. Give diagnostic criteria, if applicable (p. 7-8) ✓                                                                                                                                                                                                                     |
| Data sources/<br>measurement | 8*      | For each variable of interest, give sources of data and details of methods of assessment (measurement). Describe comparability of assessment methods if there is more than one group (p. 6-7 and Appendix) ✓                                                                                                                                                            |
| Bias                         | 9       | Describe any efforts to address potential sources of bias (p. 12-13) ✓                                                                                                                                                                                                                                                                                                  |
| Study size                   | 10      | Explain how the study size was arrived at. NOT APPLICABLE (all people included)                                                                                                                                                                                                                                                                                         |
| Quantitative variables       | 11      | Explain how quantitative variables were handled in the analyses. If applicable, describe which groupings were chosen and why (p. 8) ✓                                                                                                                                                                                                                                   |
| Statistical methods          | 12      | (a) Describe all statistical methods, including those used to control for confounding (p. 8) ✓<br>(b) Describe any methods used to examine subgroups and interactions (p. 8) ✓<br>(c) Explain how missing data were addressed N/A ✓<br>(d) If applicable, explain how loss to follow-up was addressed. NOT APPLICABLE<br>(e) Describe any sensitivity analyses (p. 8) ✓ |
| <b>Results</b>               |         |                                                                                                                                                                                                                                                                                                                                                                         |
| Participants                 | 13*     | (a) Report numbers of individuals at each stage of study—eg numbers potentially eligible, examined for eligibility, confirmed eligible, included in the study, completing follow-up, and analysed (p. 9) ✓<br>(b) Give reasons for non-participation at each stage. NOT APPLICABLE<br>(c) Consider use of a flow diagram (Figure 1) ✓                                   |
| Descriptive data             | 14*     | (a) Give characteristics of study participants (eg demographic, clinical, social) and information on exposures and potential confounders (p. 19, Table 1) ✓<br>(b) Indicate number of participants with missing data for each variable of interest. NA<br>(c) Summarise follow-up time (eg, average and total amount) (p. 6) ✓                                          |
| Outcome data                 | 15*     | Report numbers of outcome events or summary measures over time (p. 9) ✓                                                                                                                                                                                                                                                                                                 |
| Main results                 | 16      | (a) Give unadjusted estimates and, if applicable, confounder-adjusted estimates and                                                                                                                                                                                                                                                                                     |



|                          |    |                                                                                                                                                                                         |
|--------------------------|----|-----------------------------------------------------------------------------------------------------------------------------------------------------------------------------------------|
|                          |    | their precision (eg, 95% confidence interval). Make clear which confounders were adjusted for and why they were included (p. 19-23, Tables 1-5) ✓                                       |
|                          |    | (b) Report category boundaries when continuous variables were categorized (p.19,21,23, Tables 1,3,5) ✓                                                                                  |
|                          |    | (c) If relevant, consider translating estimates of relative risk into absolute risk for a meaningful time period NA                                                                     |
| Other analyses           | 17 | Report other analyses done—eg analyses of subgroups and interactions, and sensitivity analyses (p. 22-23; Tables 4-5) ✓                                                                 |
| <b>Discussion</b>        |    |                                                                                                                                                                                         |
| Key results              | 18 | Summarise key results with reference to study objectives (p. 13) ✓                                                                                                                      |
| Limitations              | 19 | Discuss limitations of the study, taking into account sources of potential bias or imprecision. Discuss both direction and magnitude of any potential bias (p. 10-13) ✓                 |
| Interpretation           | 20 | Give a cautious overall interpretation of results considering objectives, limitations, multiplicity of analyses, results from similar studies, and other relevant evidence (p. 10-13) ✓ |
| Generalisability         | 21 | Discuss the generalisability (external validity) of the study results (p. 13) ✓                                                                                                         |
| <b>Other information</b> |    |                                                                                                                                                                                         |
| Funding                  | 22 | Give the source of funding and the role of the funders for the present study and, if applicable, for the original study on which the present article is based (p. 14) ✓                 |

\*Give information separately for exposed and unexposed groups.

**Note:** An Explanation and Elaboration article discusses each checklist item and gives methodological background and published examples of transparent reporting. The STROBE checklist is best used in conjunction with this article (freely available on the Web sites of PLoS Medicine at <http://www.plosmedicine.org/>, Annals of Internal Medicine at <http://www.annals.org/>, and Epidemiology at <http://www.epidem.com/>). Information on the STROBE Initiative is available at <http://www.strobe-statement.org>.

# BMJ Open

## Influence of prior comorbidities and chronic medications use on the risk of COVID19 in adults: a population based cohort study in Tarragona, Spain

|                                 |                                                                                                                                                                                                                                                                                                                                                                                                                                                                                                                                                                                                                                                                                                                                                                                                                                                                                                                                                                                                                                                                                                                                                                                                                                           |
|---------------------------------|-------------------------------------------------------------------------------------------------------------------------------------------------------------------------------------------------------------------------------------------------------------------------------------------------------------------------------------------------------------------------------------------------------------------------------------------------------------------------------------------------------------------------------------------------------------------------------------------------------------------------------------------------------------------------------------------------------------------------------------------------------------------------------------------------------------------------------------------------------------------------------------------------------------------------------------------------------------------------------------------------------------------------------------------------------------------------------------------------------------------------------------------------------------------------------------------------------------------------------------------|
| Journal:                        | <i>BMJ Open</i>                                                                                                                                                                                                                                                                                                                                                                                                                                                                                                                                                                                                                                                                                                                                                                                                                                                                                                                                                                                                                                                                                                                                                                                                                           |
| Manuscript ID                   | bmjopen-2020-041577.R2                                                                                                                                                                                                                                                                                                                                                                                                                                                                                                                                                                                                                                                                                                                                                                                                                                                                                                                                                                                                                                                                                                                                                                                                                    |
| Article Type:                   | Original research                                                                                                                                                                                                                                                                                                                                                                                                                                                                                                                                                                                                                                                                                                                                                                                                                                                                                                                                                                                                                                                                                                                                                                                                                         |
| Date Submitted by the Author:   | 16-Nov-2020                                                                                                                                                                                                                                                                                                                                                                                                                                                                                                                                                                                                                                                                                                                                                                                                                                                                                                                                                                                                                                                                                                                                                                                                                               |
| Complete List of Authors:       | Vila-Córcoles, Angel; Institut Catala De La Salut, Primary Healthcare Service Camp de Tarragona; IDIAP Jordi Gol, Unitat de Suport a la recerca Camp de Tarragona-Reus<br>Ochoa-Gondar, Olga; Institut Catala De La Salut, Primary Healthcare Service Camp de Tarragona; IDIAP Jordi Gol, Unitat de suport a la recerca Camp de Tarragona-Reus<br>Satué, EVA; Institut Catala De La Salut, Primary Healthcare Service Camp de Tarragona; IDIAP Jordi Gol, Unitat de suport a la recerca Camp de Tarragona-Reus<br>Torrente-Fraga, Cristina; Institut Catala De La Salut, Information and Communication Technologies<br>Gomez-Bertomeu, Frederic; Institut Catala De La Salut, Department of Microbiology. Hospital Universtari Joan XXIII<br>Vila-Rovira, Angel; IDIAP Jordi Gol, Unitat de suport a la recerca Camp de Tarragona-Reus<br>Hospital-Guardiola, Immaculada; Institut Catala De La Salut, Primary Healthcare Service Camp de Tarragona<br>de Diego-Cabanes, Cinta; Institut Catala De La Salut, Primary Healthcare Service Camp de Tarragona<br>Bejarano, Ferran; Institut Catala De La Salut, Department of Pharmacology. Primary Healthcare Service Camp de Tarragona<br>Basora-Gallisà, Josep; IDIAP Jordi Gol, Direction |
| <b>Primary Subject Heading</b>: | Infectious diseases                                                                                                                                                                                                                                                                                                                                                                                                                                                                                                                                                                                                                                                                                                                                                                                                                                                                                                                                                                                                                                                                                                                                                                                                                       |
| Secondary Subject Heading:      | Epidemiology                                                                                                                                                                                                                                                                                                                                                                                                                                                                                                                                                                                                                                                                                                                                                                                                                                                                                                                                                                                                                                                                                                                                                                                                                              |
| Keywords:                       | EPIDEMIOLOGY, Epidemiology < INFECTIOUS DISEASES, PRIMARY CARE, Public health < INFECTIOUS DISEASES                                                                                                                                                                                                                                                                                                                                                                                                                                                                                                                                                                                                                                                                                                                                                                                                                                                                                                                                                                                                                                                                                                                                       |
|                                 |                                                                                                                                                                                                                                                                                                                                                                                                                                                                                                                                                                                                                                                                                                                                                                                                                                                                                                                                                                                                                                                                                                                                                                                                                                           |

SCHOLARONE™  
Manuscripts



I, the Submitting Author has the right to grant and does grant on behalf of all authors of the Work (as defined in the below author licence), an exclusive licence and/or a non-exclusive licence for contributions from authors who are: i) UK Crown employees; ii) where BMJ has agreed a CC-BY licence shall apply, and/or iii) in accordance with the terms applicable for US Federal Government officers or employees acting as part of their official duties; on a worldwide, perpetual, irrevocable, royalty-free basis to BMJ Publishing Group Ltd ("BMJ") its licensees and where the relevant Journal is co-owned by BMJ to the co-owners of the Journal, to publish the Work in this journal and any other BMJ products and to exploit all rights, as set out in our [licence](#).

The Submitting Author accepts and understands that any supply made under these terms is made by BMJ to the Submitting Author unless you are acting as an employee on behalf of your employer or a postgraduate student of an affiliated institution which is paying any applicable article publishing charge ("APC") for Open Access articles. Where the Submitting Author wishes to make the Work available on an Open Access basis (and intends to pay the relevant APC), the terms of reuse of such Open Access shall be governed by a Creative Commons licence – details of these licences and which [Creative Commons](#) licence will apply to this Work are set out in our licence referred to above.

Other than as permitted in any relevant BMJ Author's Self Archiving Policies, I confirm this Work has not been accepted for publication elsewhere, is not being considered for publication elsewhere and does not duplicate material already published. I confirm all authors consent to publication of this Work and authorise the granting of this licence.

**TITLE PAGE**

**Title:** Influence of prior comorbidities and chronic medications use on the risk of COVID-19 in adults: a population based cohort study in Tarragona, Spain.

**Author and Co-author's name**

- 1) Angel Vila-Corcoles,
- 2) Olga Ochoa-Gondar,
- 3) Eva Satue-Gracia,
- 4) Cristina Torrente-Fraga,
- 5) Frederic Gomez-Bertomeu,
- 6) Angel Vila-Rovira,
- 7) Immaculada Hospital-Guardiola,
- 8) Cinta de Diego-Cabanes,
- 9) Ferran Bejarano-Romero
- 10) Josep Basora-Gallisa.

**Name, postal address, email, telephone, and fax numbers of the corresponding author.**

Name: Eva M<sup>a</sup> Satué Gracia

Postal address: C/ Rambla Nova, 124, Esc D, 1A, 43001, Tarragona (Spain)

Email: [esatue.tgn.ics@gencat.cat](mailto:esatue.tgn.ics@gencat.cat)

Telephone number. +0034977254021

Fax number: +0034977226411

**Full names, institutions, city, and country of all co-authors.**

1) FULL NAME: Angel Vila-Corcoles, MD ([avila.tgn.ics@gencat.cat](mailto:avila.tgn.ics@gencat.cat))

INSTITUTION 1: Primary Health Care Service Camp de Tarragona. Institut Catala de la Salut.

CITY: Tarragona

COUNTRY: Spain.

INSTITUTION 2: Unitat de Suport a la Recerca Camp de Tarragona-Reus. IDIAP Jordi Gol.

CITY: Barcelona

COUNTRY: Spain.

2) FULL NAME: Olga Ochoa-Gondar, MD ([oochoa.tgn.ics@gencat.cat](mailto:oochoa.tgn.ics@gencat.cat))

INSTITUTION 1: Primary Health Care Service Camp de Tarragona. Institut Catala de la Salut.

CITY: Tarragona

COUNTRY: Spain.

INSTITUTION 2: Unitat de Suport a la Recerca Camp de Tarragona-Reus. IDIAP Jordi Gol.

CITY: Barcelona

COUNTRY: Spain.

3) FULL NAME: Eva Satue-Gracia, MD ([esatue.tgn.ics@gencat.cat](mailto:esatue.tgn.ics@gencat.cat))

INSTITUTION 1: Primary Health Care Service Camp de Tarragona. Institut Catala de la Salut.

CITY: Tarragona

COUNTRY: Spain.

INSTITUTION 2: Unitat de Suport a la Recerca Camp de Tarragona-Reus. IDIAP Jordi Gol.

1  
2  
3 CITY: Barcelona  
4 COUNTRY: Spain.

5 4) FULL NAME: Cristina Torrente-Fraga, DM ([ctorrente.tgn.ics@gencat.cat](mailto:ctorrente.tgn.ics@gencat.cat))

6  
7 INSTITUTION 1: Department of information and communication technologies. DAP Camp de  
8 Tarragona. Institut Catala de la Salut.

9 CITY: Tarragona  
10 COUNTRY: Spain.

11 5) FULL NAME: Frederic Gomez-Bertomeu, MD ([ffgomez.hj23.ics@gencat.cat](mailto:ffgomez.hj23.ics@gencat.cat))

12  
13 INSTITUTION 1: Department of Microbiology. Hospital Universitari Joan XXIII. Institut Catala de  
14 la Salut.

15 CITY: Tarragona  
16 COUNTRY: Spain.

17 6) FULL NAME: Angel Vila-Rovira, DM ([vilapf@gmail.com](mailto:vilapf@gmail.com))

18  
19 INSTITUTION 1: Unitat de Suport a la Recerca Camp de Tarragona-Reus. IDIAP Jordi Gol.  
20 CITY: Barcelona

21 COUNTRY: Spain.  
22  
23

24 7) FULL NAME: Immaculada Hospital-Guardiola, PhD ([ihospitalg.tgn.ics@gencat.cat](mailto:ihospitalg.tgn.ics@gencat.cat))

25  
26 INSTITUTION 1: Primary Health Care Service Camp de Tarragona. Institut Catala de la Salut.

27 CITY: Tarragona

28 COUNTRY: Spain  
29  
30

31 8) FULL NAME: Cinta de Diego-Cabanes, MD ([mcdiego.tgn.ics@gencat.cat](mailto:mcdiego.tgn.ics@gencat.cat))

32  
33 INSTITUTION 1: Primary Health Care Service Camp de Tarragona. Institut Catala de la Salut.

34 CITY: Tarragona

35 COUNTRY: Spain  
36  
37

38 9) FULL NAME: Ferran Bejarano-Romero, PhD ([fbejarano.tgn.ics@gencat.cat](mailto:fbejarano.tgn.ics@gencat.cat))

39  
40 INSTITUTION 1: Department of Pharmacology. DAP Camp de Tarragona. Institut Catala de la  
41 Salut.

42 CITY: Tarragona

43 COUNTRY: Spain  
44

45 10) FULL NAME: Josep Basora-Gallisa, PhD ([jbasora@idiapjgol.org](mailto:jbasora@idiapjgol.org))

46  
47 INSTITUTION 1: Fundació Institut Universitari per a la recerca a l'Atenció Primària de Salut  
48 Jordi Gol i Gurina (IDIAPJGol)

49 CITY: Barcelona

50 COUNTRY: Spain.  
51

52 **KEYWORDS:** Coronavirus Infections, COVID-19, Incidence, Risk, Disease Prevention

53 **WORD COUNT:** 3832 words (including abstract)  
54  
55

56 **Contributors:** AVC designed the study and wrote the manuscript; CTF and FGB obtained data;  
57 ESG, IHG and CDC assessed outcomes; OOG and AVR did statistical analyses; FBR revised  
58 pharmacological data; AVC and JBG coordinated the study.  
59  
60

1  
2  
3 **Funding:** This study is supported by a grant from the Instituto de Salud Carlos III of the Spanish  
4 Health Ministry (file COV20/00852; call for the SARS-COV-2/COVID-19 disease, RDL 8/2020,  
5 March 17, 2020). The funders had no role in study design, data collection and analysis, decision  
6 to publish, or preparation of the manuscript  
7

8 **INTEREST CONFLICTS:** All authors, none declared.  
9  
10  
11  
12  
13  
14  
15  
16  
17  
18  
19  
20  
21  
22  
23  
24  
25  
26  
27  
28  
29  
30  
31  
32  
33  
34  
35  
36  
37  
38  
39  
40  
41  
42  
43  
44  
45  
46  
47  
48  
49  
50  
51  
52  
53  
54  
55  
56  
57  
58  
59  
60

For peer review only

1  
2  
3  
4 **Influence of prior comorbidities and chronic medications use on the risk of COVID-19 in**  
5 **adults: a population based cohort study in Tarragona, Spain)**  
6

7 **ABSTRACT**

8  
9 OBJECTIVE: To investigate possible relationships between pre-existing medical conditions  
10 (including common comorbidities and chronic medications) and risk for suffering COVID-19  
11 disease in middle-aged and older adults.

12 DESIGN: Population-based retrospective cohort study.

13 SETTING: twelve primary care centres (PCCs) in Tarragona (Spain).

14 PARTICIPANTS: 79,083 people (77,676 community-dwelling and 1407 nursing-home  
15 residents), who were all individuals >50 years affiliated to the 12 participating PCCs.

16  
17 OUTCOMES: Baseline cohort characteristics (age, sex, vaccinations, comorbidities and chronic  
18 medications) were established at study start (01/03/2020) and primary outcome was time to  
19 COVID-19 confirmed by PCR among cohort members throughout epidemic period (from  
20 01/03/2020 to 23/05/2020). Risk for suffering COVID-19 was evaluated by Cox regression,  
21 estimating multivariable hazard ratios (HRs) adjusted for age, sex, comorbidities and  
22 medications use.

23  
24 RESULTS: During study period, 2324 cohort members were PCR-tested, with 1944 negative  
25 and 380 positive results, which means an incidence of 480.5 PCR-confirmed COVID-19 cases  
26 per 100,000 persons-period. Assessing the total study cohort only age (HR: 1.02; 95% CI: 1.01-  
27 1.03; p=0.002), nursing-home residence (HR: 21.83; 95% CI: 16.66-28.61; p<0.001) and  
28 receiving diuretics (HR: 1.35; 95% CI: 1.04-1.76; p=0.026) appeared independently associated  
29 with increased risk. Smoking (HR: 0.62; 95%CI: 0.41-0.93; p=0.022), ACE-inhibitors (HR: 0.68;  
30 95%CI: 0.47-0.99; p=0.046) and antihistamine (HR: 0.47; 95% CI: 0.22-1.01; p=0.052) were  
31 associated with a lower risk. Among community-dwelling individuals, cancer (HR: 1.52; 95% CI:  
32 1.03-2.24; p=0.035), chronic respiratory disease (HR: 1.82; 95% CI: 1.08-3.07; p=0.025) and  
33 cardiac disease (HR: 1.53; 95% CI: 1.06-2.19; p=0.021) emerged also associated with an  
34 increased risk. Receiving ACE-inhibitors (HR: 0.66; 95% CI: 0.44-0.99; p=0.046) and flu  
35 vaccination (HR: 0.63; 95% CI: 0.44-0.91; p=0.012) were associated with decreased risk.

36 CONCLUSION: Age, nursing-home residence and multiple comorbidities appear predisposing  
37 for COVID-19. Conversely, receiving ACE-inhibitors, antihistamine and influenza vaccination  
38 could be protective, which should be closely investigated in further studies specifically focused  
39 on these concerns.

40  
41  
42 KEYWORDS: Coronavirus Infections, COVID-19, Incidence, Risk, Disease Prevention.  
43  
44  
45  
46  
47  
48  
49  
50  
51  
52  
53  
54  
55  
56  
57  
58  
59  
60

1  
2  
3  
4  
5  
6  
7  
8  
9  
10  
11  
12  
13  
14  
15  
16  
17  
18  
19  
20  
21  
22  
23  
24  
25  
26  
27  
28  
29  
30  
31  
32  
33  
34  
35  
36  
37  
38  
39  
40  
41  
42  
43  
44  
45  
46  
47  
48  
49  
50  
51  
52  
53  
54  
55  
56  
57  
58  
59  
60

**- Strengths and limitations of this study (per article summary)**

- This is a population-based cohort study involving 79,083 adults >50 years in Tarragona (Southern Catalonia, Spain)

- Cohort members were retrospectively followed across the first wave of COVID-19 epidemic period from 01/03/2020 to 23/05/2020.

- Relationships between PCR-confirmed COVID-19 incidence and chronic comorbidities and chronic medications use were assessed by multivariable Cox regression models.

- Despite the large size of study cohort, the number of events was relatively low, which limits statistical power (especially in subgroup analyses).

- PCR testing was not routinely performed (prioritized for severe case patients) and asymptomatic/oligosymptomatic cases were underestimated.



## INTRODUCTION

Currently population-based clinical data on the SARS-COV-2 coronavirus (COVID-19 disease) pandemic is limited. Furthermore, the available clinical information comes mainly from hospitalized and therefore more severe patients (especially those who required intensive care or those who died)<sup>1-4</sup> and there are few community data, from primary care, covering a larger sample of the population. In fact, there is very scarce data assessing incidence and risk for suffering infection in relation with pre-existing clinical characteristics of the population (i.e, baseline risk profile according to previous underlying conditions/medications use).<sup>5,6</sup>

Earlier studies regarding clinical characteristics and prevalence of comorbidities in patients infected with SARS-CoV-2 reported that diabetes mellitus, obesity, cardiovascular disease (including hypertension) chronic respiratory diseases and smoking were major risk factors associated with severe COVID-19.<sup>1-4</sup>

A more recent systematic review and meta-analysis has reported that COVID-19 patients with cardiovascular disease, hypertension, diabetes, congestive heart failure, chronic kidney disease and cancer have a greater risk of mortality compared to patients with COVID-19 without these comorbidities.<sup>7</sup> However, these results (mainly based on hospitalised cases and observational data) were likely to be confounded by age or other conditions (including sociodemographic) and therefore concerns have been raised about the possibility that some of these comorbidities/underlying conditions increase risk for severe disease, but they were not really related “per se” with an increased risk of infection.

Unlike most previous studies that examined risk factors for poor prognosis, few published studies have reported characteristics associated with susceptibility to SARS-CoV-2 infection. On this, recently published primary care cohort study from the Oxford Royal College of General Practitioners in the United Kingdom has reported similar risk factors associated with positive-PCR testing as observed for severe outcomes of COVID-19 in hospital settings, (except for smoking) and has provided some evidence of potential sociodemographic factors associated with a positive PCR-testing (including socioeconomic deprivation, population density and ethnicity).<sup>5</sup>

Considering the relationship between socio-demographic aspects and susceptibility for COVID-19, some studies reported that sex men older age are associated with a higher risk of infection and a worse prognosis But evidence on sociodemographic and clinical disparities related with the susceptibility for SARS-COV-2 infection is limited and new studies collecting this data are needed.<sup>5,6,8</sup>

Taking this situation into account, we designed this study whose objective was to investigate the incidence and risk of suffering from COVID-19 infection in adults over 50 years in Tarragona (Southern Catalonia, Spain) with pre-existing comorbidities or using chronic medications, over the first 12-weeks pandemic period in the study area.

## METHODS

### Design, setting and study population

This is a retrospective cohort study involving 79,083 people  $\geq 50$  years-old in the region of Tarragona (a residential-industrial urban area in Southern Catalonia, Spain, with an overall population of 210,672 all-age inhabitants). The cohort consisted of individuals  $>50$  years-old (birth day data before 01/01/1970) affiliated in the 12 participating primary care centres (PCCs) managed by the Institut Català de la Salut (ICS) in the study area. In the study setting (concretely “Tarragonés”, “Alt Camp” and “Conca de Barberà” counties) there are 16 PCCs overall. Of them, 12 PCCs (those included in this study) are managed by the ICS, whereas the remaining 4 PCCs are managed by other providers and were not included in the present study. The study cohort represents approximately a 75% of overall inhabitants aged 50 years or older in the study area according to census data.<sup>9</sup> Reference laboratory and hospital for the 12 participating PCCs were the Hospital Universitari Joan XXIII and its Microbiological Service in Tarragona city.

Figure 1 shows the distribution of the cohort members between nursing-home residents and community dwellings; and also the number of suspected cases and the PCR tests (positive and negative) performed in the aforementioned population subgroups.

Cohort members were retrospectively followed from 01/03/2020 (the beginning of epidemic period in the region), until the occurrence of any study event (COVID-19 diagnosis) or until the end of 12-weeks follow-up (23/05/2020). The study was approved by the ethical committee of the Institution (Ethics Committee IDIAP Jordi Gol, Barcelona, file 20/065-PCV) and was conducted according to the Helsinki Declaration and Spanish legislation on biomedical studies, data protection and respect for human rights.<sup>10</sup>

### Data sources

The CAPAMIS Research Database, a pre-existing institutional database that we had previously used for other cohort studies carried out in our region<sup>11</sup> was rapidly updated to become the primary data source for this epidemiological study. Briefly, this research database collects information from the electronic clinical records system (in operation since the 2000s) which is used, at the institutional level, by the PCCs in the region. It includes administrative and clinical data, such as diagnoses, coded according to the International Classification of Diseases 10th Revision (ICD-10) and it allowed us to identify sociodemographic characteristics, comorbidities, history of vaccinations and use of active drugs among cohort members to establish their baseline characteristics at the beginning of the study period (03/01/2020).

At the start of the COVID19 pandemic in our region, two new alerts related to laboratory records (results of diagnostic tests for SARS-CoV-2 infection) and ICD-10 codes for COVID-19 suspicion (B34.2: Unspecified coronavirus infection; B97.29: Other coronavirus as the cause of diseases classified elsewhere) were added to the electronic clinical records system. The registries provided from both data sources were linked to build an anonymized research database, which is the one we have used for this study.

### Outcomes

Primary outcome was time (from study start) to COVID-19 confirmed by positive polymerase chain reaction test (PCR) among cohort members throughout study period (from 01/03/2020 to 23/05/2020). We also reported, in the descriptive analysis, cases with a negative result in the PCR test (laboratory-excluded cases) and cases of presumed COVID-19 (people who were assigned a code of clinical suspicion of the disease but no PCR was performed).

The guidelines of the Department of Health of the *Generalitat de Catalunya* were followed for the laboratory diagnosis of COVID-19 by RT-PCR.<sup>12</sup> In summary, the Cobas © SARS-CoV-2 RT-PCR technique with CE-FDA marking was performed from samples collected by nasal and pharyngeal swabs with transport medium for viruses and refrigerated at 4 ° C for a maximum of 48 hours; a sensitivity and specificity close to 100% have been reported for this test.<sup>13</sup> When the epidemic period began, there was little availability of PCR tests, and they were prioritized for severe cases (requiring hospital admission) and for nursing-home residents (since there were several outbreaks in residences), while among suspected cases of outpatient management, conducted fewer PCR-tests.

## Exposure

Baseline use of common chronic medications, which could be hypothetically related with physiopathological mechanism of SARS-COV-2 infection or virulence (e.g., antihypertensive, antiplatelet/anticoagulant and/or anti-inflammatory drugs), were considered as main explanatory variables possibly related with the occurrence of COVID-19 for the present study. It was determined by a review of the PHCCs' electronic clinical records system which contains specially designated fields for medications prescribed. Thus, active medication treatments in each cohort member on 01/03/2020, coded according to the Anatomical, Therapeutic, and Chemical classification system (ATC) of the World Health Organization,<sup>14</sup> were identified from the patient treatment plan registered in the PCC's clinical records system, and included the following therapeutic groups: antihypertensive (diuretics, beta-blockers, angiotensin converting enzyme inhibitors [ACEIs], angiotensin II receptor blockers [ARBs], calcium channel blockers), statins, anticoagulants (warfarin and new oral anticoagulant drugs), antiplatelet drugs, antidiabetic drugs (insulin, oral antidiabetic drugs), inhaled respiratory drugs, antineoplastic agents, systemic corticosteroids, non-steroidal anti-inflammatory drugs (NSADs), chloroquine/hydroxychloroquine, antihistamines, proton-pump inhibitors and benzodiazepines (see Appendix).

## Covariates

Besides age, sex, residence (community-dwelling/nursing-home), and vaccinations' history (flu vaccination in prior autumn or pneumococcal vaccination at any time), the following comorbidities/underlying conditions, obtained from the registries in the electronic PCCs clinical records on 01/03/2020, were considered: neurological disease (including dementia and stroke), cancer (solid organ or haematological neoplasia diagnosed in past 5 years), chronic renal failure, systemic Autoimmune Rheumatic Diseases (including rheumatoid arthritis and lupus), chronic respiratory disease (including chronic bronchitis/emphysema and/or asthma), chronic heart disease (including congestive heart failure, coronary artery disease and other cardiopathies), atrial fibrillation, chronic liver disease (including chronic hepatitis and cirrhosis), hypertension, diabetes mellitus, hypercholesterolemia, obesity and smoking (see Appendix). Comorbidities were chosen on the basis of immunocompromise degree and risk for severe respiratory illness as usually used in other studies about community-acquired pneumonia.<sup>11</sup>

## Statistical analyses

We calculated the Incidence rates (IRs), with their corresponding 95% Confidence intervals (CIs) –estimated assuming a Poisson distribution for uncommon events–, for PCR-confirmed COVID-19 per 100,000 person-period (12 weeks). The baseline characteristics of the individuals, based on whether or not they had COVID-19, were compared using Chi-squared or Fisher's test as appropriate, in bivariate analyses.

Cox regression analyses were used to calculate unadjusted and multivariable-adjusted hazards ratios (HRs) and estimate the association between baseline exposure conditions and the time to PCR-confirmed COVID-19 occurred among cohort members throughout the epidemic period (from 01/03/2020 to 23/05/2020). The multivariable Cox models were made with all above mentioned exposure variables and co-variables (i.e, age, sex, residence, vaccinations history, comorbidities/underlying conditions and medications use). The method to select a subset of co-variables to include in the final model was the purposeful selection. The final models include significant, confounders and all co-variables judged clinically or epidemiologically relevant. A main analysis was performed for the entire study cohort (N=79,083) as well as two subgroup analyses for community-dwelling individuals (N=77,676) and for nursing-home residents (N=1407). The level of statistical significance was established at  $p < 0.05$  (two-tailed). IBM SPSS Statistics for Windows, version 24 (IBM Corp., Armonk, N.Y., USA) was used to analyse the data.

This methodology is very similar to the one reported in a previous article from the authors published in Journal of Clinical Hypertension (JCH)<sup>15</sup>. Both articles are part of the same project. Unlike the one published in JCH, the current article reports results referring to the total study population, distinguishing between community-dwelling and nursing home residents and extends the analysis period until May 23.

## RESULTS:

Across the study period an amount of 2324 cohort members were PCR tested. Of them, 380 (16.4%) presented a positive result (PCR-confirmed COVID-19) and 1944 (83.6%) presented a negative result. Additionally, 377 cohort members with presumptive COVID-19 (clinical suspicion alone) were not PCR tested.

As compared with the structure of the study population (54% aged 50-64 years vs 44% aged >65 years, 47.6% men vs 52.4% women, 98.2% community-dwelling vs 1.8% nursing-home residents), PCR testing was more frequently performed among elderly people and nursing-home residents. Indeed, PCR was tested (positive plus negative results) in 930 (40%) people aged 50-64 years vs 1394 (60%) in aged >65 years ( $p<0.001$ ), 1023 (44%) in men vs 1301 (56%) in women ( $p=0.007$ ) and 1789 (77%) in community-dwelling vs 535 (23%) in nursing-home residents ( $p<0.001$ ).

Of the 380 PCR-confirmed COVID-19 cases, 158 (41.6%) occurred in men and 222 (58.4%) in women. By age groups, 101 (26.6%) occurred in people 50-64 years, 95 (25%) in 65-79 years and 184 (48.4%) in 80 years or older. By residence, 160 cases (42.1%) occurred in nursing-home residents and 220 (57.9%) in community-dwelling individuals. This means an overall IR of 480.5 PCR-confirmed COVID-19 cases per 100,000 persons-period (236.6 in 50-64 yrs vs 365.2 in 65-79 yrs vs 1771.6 in 80 yrs or older; 419.9 in men vs 535.5 in women)

The most prevalent pre-existing comorbidities/underlying conditions among the 380 COVID-19 patients were hypertension (58.7%), hypercholesterolemia (35%), chronic cardiac disease (32.4%), diabetes (26.8%) and obesity (25.3%).

By underlying conditions, maximum IRs (per 100,000 persons-period) emerged among those persons with neurological diseases (2848.5) followed by atrial fibrillation (1452.7), chronic renal failure (1094.7), chronic heart disease (915.5), chronic respiratory disease (866.3), diabetes (765.9), cancer (739.1) and hypertension (638.1). Lower IRs were observed among persons with rheumatic diseases (229.4) and smokers (211.8). According to pre-existing active medications, maximum IRs (per 100,000) appeared among those receiving diuretics (1308.8), insulin (1282.1), oral anticoagulants (1175.9) and inhaled-respiratory therapy (969.3) (Table 1).

Table 2 shows unadjusted and multivariable adjusted analyses evaluating risk for suffering PCR-confirmed COVID-19 in the total study cohort. In the unadjusted analysis, many underlying conditions and medications use were associated with an increased risk. However, after multivariable-adjustment, only age (HR: 1.02; 95% CI: 1.01-1.03;  $p=0.002$ ), nursing-home residence (HR: 21.83; 95% CI: 16.66-28.61;  $p<0.001$ ) and receiving diuretics (HR: 1.35; 95% CI: 1.04-1.76;  $p=0.026$ ) appeared significantly associated with an increasing risk. Conversely, smoking (HR: 0.62; 95% CI: 0.41-0.93;  $p=0.022$ ), receiving angiotensin II receptor blockers (HR: 0.68; 95% CI: 0.47-0.99;  $p=0.046$ ) and antihistamines (HR: 0.47; 95% CI: 0.22-1.01;  $p=0.052$ ) appeared associated with a reduced risk.

Among community-dwelling individuals (N=77,676), 1789 people were PCR tested. Of them, 1569 (87.7%) presented a negative result and 220 (12.3%) a positive result. Additionally, 358 people were codified as presumptive COVID-19 cases (clinical suspicion without PCR performed). Table 3 shows distribution of PCR-confirmed COVID-19 cases and specific-IRs by demographical characteristics, underlying conditions and medications use among community-dwelling individuals. In the multivariable analysis focused on these community-dwelling individuals, chronic respiratory disease (HR: 1.82; 95% CI: 1.08-3.07;  $p=0.025$ ), cardiac disease (HR: 1.53; 95% CI: 1.06-2.19;  $p=0.021$ ) cancer (HR: 1.52; 95% CI: 1.03-2.24;  $p=0.035$ ) receiving diuretics (HR: 1.54; 95% CI: 1.04-2.27;  $p=0.031$ ) and insulin (HR: 1.79; 95% CI: 1.00-3.21;  $p=0.049$ ) were associated with an increasing risk, whereas smoking (HR: 0.49; 95% CI: 0.30-0.80;  $p=0.004$ ), receiving ACE-inhibitors (HR: 0.66; 95% CI: 0.44-0.99;  $p=0.046$ ) and influenza vaccination in prior autumn (HR: 0.63; 95% CI: 0.44-0.91;  $p=0.012$ ) were associated with a decreased risk (Table 4).

Among nursing-home residents (N=1407), where several outbreaks occurred, a total of 554 possible COVID-19 cases were observed. Of them, 375 were excluded by a PCR negative result, 160 were confirmed by positive PCR and 19 were not PCR tested. Table 5 shows

1  
2  
3 univariate and multivariate analysis on PCR-confirmed COVID-19 cases in subgroup analysis  
4 restricted to nursing-home residents. In the multivariable analysis, increasing age and receiving  
5 antineoplastic agents were associated with an increasing risk, whereas receiving angiotensin II  
6 receptor blockers was associated with a decreased risk (HR: 0.45; 95% CI: 0.23-0.90; p=0.023).  
7  
8

## 9 DISCUSSION

10 In the current context of COVID-19 clinical uncertainties, there is not clear evidence about  
11 possible clinical predisposing or protecting factors related with SARS-CoV-2 infection. In the  
12 present study, the overall incidence rate of PCR-confirmed COVID-19 (480.5 cases per 100,000  
13 persons-period) may be considered intermediate/low as compared with other Spanish regions.<sup>16</sup>  
14

15 Considering sociodemographical variables, apart of nursing-home residence that increased  
16 more than twenty-times the adjusted-risk for PCR-confirmed COVID-19, we found that age  
17 increased approximately a 2% for each year the adjusted-risk for suffering COVID-19. Despite  
18 COVID-19 was more frequent in women, sex did not alter significantly the risk of infection in  
19 multivariable analysis.

20 None comorbidity appeared independently associated with a significant increased risk for PCR-  
21 confirmed COVID-19 in the multivariable analysis evaluating the total study population.  
22 Nevertheless, pre-existing cancer, chronic respiratory disease and cardiac disease emerged  
23 significantly associated with an increased risk in subgroup analysis focused on community-  
24 dwelling individuals. Hypertension, diabetes and/or obesity did not emerge independently  
25 associated with a significant increasing risk for suffering COVID-19 in our adjusted analyses.  
26 There is general consensus considering these conditions as major risk conditions related with  
27 poor prognosis in hospitalised COVID-19 patients,<sup>1-4,7,16-20</sup> but there is lacking data assessing  
28 the role of these conditions to predispose for suffering infection.<sup>2,16</sup>

29 Surprisingly, smoking was associated with a statistically significant decreased risk for suffering  
30 COVID-19 in both multivariable analyses assessing the total study cohort and the subgroup of  
31 community-dwelling individuals. This surprising data is not unique<sup>5,21</sup> and merits further  
32 investigations. Opposite findings about poor prognosis among smokers with COVID-19 have  
33 been reported.<sup>2,16,22</sup> Obviously, it must not be forgotten that smoking has severe pathological  
34 consequences (being a serious danger for health) and nicotine is a drug responsible for  
35 smoking addiction. Nevertheless, as it has been hypothesized elsewhere,<sup>23</sup> a potential  
36 protective role for nicotinic agents (under controlled conditions) against COVID-19 infection  
37 should be explored.

38 While angiotensin receptors have been related with physiopathological mechanisms of SARS-  
39 CoV-2 infection,<sup>24,25</sup> receiving ACEIs/ARBs emerged associated with a reduced risk in this  
40 study. Since the beginning of the COVID-19 global pandemic, concerns have been raised about  
41 the possibility that receiving ACEIs/ARBs could predispose individuals to severe COVID-19.<sup>26,27</sup>  
42 These concerns were based on the fact that ACE2 receptors facilitates SARS-CoV-2 cell  
43 invasion; however, this negative effect was previously established during other earlier SARS-  
44 CoV outbreaks.<sup>24-27</sup> Most recent studies have concluded that there is no clinical or experimental  
45 evidence supporting that ACEIs or ARBs augment the susceptibility to SARS-CoV-2 or  
46 aggravate the severity and outcomes of COVID-19 at present.<sup>28-31</sup> Conversely, ACEIs and ARBs  
47 may be associated with lower incidence and/or improved outcome in patients with lower  
48 respiratory tract infections,<sup>32</sup> and lower risk of all-cause mortality among COVID-19 hospitalized  
49 patients.<sup>33</sup> Our findings are in accordance with the above mentioned findings and supports that  
50 the use of RAAS-inhibitors could be beneficial in reducing risk for COVID-19 infection.

51 Other cardiovascular medications (i.e., statins, antiplatelet and/or oral anticoagulant drugs) used  
52 before COVID-19 exposition did not significantly alter the risk for COVID-19 in the present  
53 study. The use of anticoagulant therapy has been proposed to reduce risk of thrombotic events  
54 during and after COVID-19, but studies analysing the influence of the use of these drugs before  
55 infection are scarce and mostly focused on interactions with antiviral therapy.<sup>34</sup> Considering  
56 specifically statins, it has been reported that adjuvant treatment and continuation of pre-existing  
57 statin therapy could improve the clinical course of patients with COVID-19, either by their  
58 immunomodulatory action or by preventing cardiovascular damage.<sup>35</sup>

59 Receiving NSADs or corticosteroids (which have been associated with good outcomes when  
60 using in severe COVID-19 patients)<sup>36</sup> did not significantly alter risk for suffering infection in our

1  
2  
3 study cohort. A pre-print study has reported that prior use of oral steroid medications was  
4 associated with decreased COVID-19 positive testing risk ,but increased inpatient admission  
5 risk.<sup>6</sup> Available publications recommend caution until further evidence emerges surrounding the  
6 use of these drugs in COVID-19 patients.<sup>37</sup>

7 Considering controversy about chloroquine/hydroxychloroquine use,<sup>38</sup> none COVID-19 case  
8 was observed among 168 people receiving this drug (because systemic rheumatoid disease),  
9 but this study has lack statistical power to assess it.

10 Antihistamine use was associated with an almost statistically significant reduction risk of  
11 COVID-19 in the total study cohort, which would require further investigation. At present, there  
12 is no clear evidence that currently available antihistamines increase or decrease the risk of  
13 severe disease from COVID-19. Of note, H1 receptors are expressed on the surface of the  
14 smooth musculature of the respiratory tract, neutrophils, eosinophil, macrophages, monocytes  
15 and T and B lymphocytes; however, it is not evaluated what the clinical significance of the effect  
16 of these drugs may be at this level.<sup>39</sup> Considering H2, famotidine use has been associated with  
17 improved clinical outcomes in hospitalized COVID-19 patients.<sup>40</sup>

18  
19 Community-dwelling individuals who received influenza vaccination in prior autumn appeared  
20 at-decreased risk to suffer PCR-confirmed COVID-19 in our adjusted analysis. Although this  
21 finding may be possibly related with residual confounding due to unmeasured factors (e.g, life-  
22 style or health care-related factors), it merits further investigations exploring a possible  
23 immunity-related mechanism explanation (which could be important for future prevention  
24 strategies). In this way, it has been hypothesized that the resultant immunity against prior  
25 influenza infection or vaccination would, at least in part, foster immunity against SARS-CoV-2  
26 because of cross reactivity of immunity between flu and coronavirus (due to similarities in their  
27 structures).<sup>41</sup>

28 Major strengths in this study were its population-based design (a large cohort involving more  
29 than 79,000 people) and the use of multivariable analysis methods to estimate accurately  
30 possible relationships between suffering COVID-19 and common chronic medical conditions  
31 and medications use among middle aged and older adults (who suffer the greatest burden of  
32 severe disease). The study has also several limitations, mainly related with its observational  
33 nature and retrospective design. Assessing COVID-19, the most specific outcome is a  
34 laboratory-confirmed by PCR testing infection. However, this outcome depends on the reliability  
35 of RT-PCR performed (i.e, quality of the nasopharyngeal swabs specimen, timing of collection,  
36 sensitivity of tests used) and guidelines for testing over study period. On this concern, the  
37 availability of PCR tests was scarce at the beginning of the epidemic period in our setting and  
38 they were not routinely performed for all presumptive cases, being PCR tests prioritized for  
39 hospitalised or severe case patients. Obviously, residual confounding in incidence and risk  
40 estimates related to selection bias may not be excluded considering that PCR testing was not  
41 uniformly performed.

42 Of note, most COVID-19 cases included in this study were those who were severe enough to  
43 warrant medical attention during the epidemic period. Thus, it must be highlighted that those  
44 cohort members who were asymptomatic but SARS-CoV-2 infected, those that were  
45 oligosymptomatic, and those that had mild symptoms (who mostly were in self isolation and self-  
46 medicating in accordance with the recommendations of the health authorities at the time) were  
47 largely underestimated in the present study.

48 We did subgroup analysis (community-dwelling/nursing-home) and multivariable-adjustments  
49 but, as all observational studies, a residual confounding due to unmeasured factors (e.g,  
50 epidemiological, social, job and/or health care-related factors) may not be completely excluded.  
51 We have not data about need for hospitalisation and clinical course (hospitalisation/ICU  
52 admission or death) and, consequently, the study was not able to assess severity degree of  
53 cases. Despite the large size of the study cohort, there where relatively few events (n=380)  
54 which limits statistical power, especially in subgroup analysis. The study was conducted in a  
55 single geographical area and, logically, specific incidence data may not be directly extrapolated  
56 to other geographical regions with distinct epidemic conditions. Nevertheless, adjusted-risk  
57 estimates may be helpful to better characterize risk profile for suffering COVID-19 among  
58 middle-aged and older adults in relation with common chronic medications use, providing new  
59 arguments to explore possible preventive/treatment research lines.  
60

1  
2  
3 In summary, our data supports that increasing age, nursing-home residence, pre-existing  
4 cancer, chronic respiratory and cardiac disease are independent major predisposing conditions  
5 to suffer COVID-19 among middle-aged and older adults. Patients receiving diuretics were also  
6 at increased risk. Conversely, smokers (who suffered the lowest incidence), patients receiving  
7 RAAS inhibitors (and possibly antihistamines) and those community-dwelling individuals that  
8 received influenza vaccination in prior autumn appear at decreased risk, which should be  
9 closely investigated in future studies specifically focused on these concerns. We note that for  
10 most common chronic medications/treatments there is lacking data reporting the possible  
11 influence of previous use of these medications on the risk for developing COVID-19.

12 Since a clinical and public health-oriented point of view, meanwhile an efficacious treatment or  
13 vaccination against COVID-19 will be available, universal influenza vaccination, RAAS-inhibitors  
14 in cardiovascular patients and possibly antihistamine drugs in allergic patients could be  
15 complementary tools partially protecting against COVID-19.  
16  
17  
18  
19  
20  
21  
22  
23  
24  
25  
26  
27  
28  
29  
30  
31  
32  
33  
34  
35  
36  
37  
38  
39  
40  
41  
42  
43  
44  
45  
46  
47  
48  
49  
50  
51  
52  
53  
54  
55  
56  
57  
58  
59  
60

1  
2  
3  
4  
5  
6  
7  
8  
9  
**Author's contributions:** AVC designed the study and wrote the manuscript; CTF and FGB obtained data; ESG, IHG and CDC assessed outcomes; OOG and AVR did statistical analyses; FBR revised pharmacological data; AVC and JBG coordinated the study.

10  
11  
12  
13  
14  
**Funding:** This study is supported by a grant from the Instituto de Salud Carlos III of the Spanish Health Ministry (file COV20/00852; call for the SARS-COV-2/COVID-19 disease, RDL 8/2020, March 17, 2020). The funders had no role in study design, data collection and analysis, decision to publish, or preparation of the manuscript.

15  
16  
17  
**Competing interest:** None declared

18  
19  
**Patient consent for publication:** Not required.

20  
21  
22  
23  
24  
**Ethics approval:** The study was approved by the ethical committee of the Institution (Ethics Committee IDIAP Jordi Gol, Barcelona, file 20/065-PCV) and was conducted according to the Helsinki Declaration and Spanish legislation on biomedical studies, data protection and respect for human rights.

25  
26  
27  
**Data availability statement:** Data are available upon reasonable request

28  
29  
30  
31  
32  
33  
34  
35  
36  
37  
38  
39  
40  
41  
42  
43  
44  
45  
46  
47  
48  
49  
50  
51  
52  
53  
54  
55  
56  
57  
58  
59  
60  
**Patient and Public Involvement statement:** It was not appropriate or possible to involve patients or the public in the design, or conduct, or reporting, or dissemination plans of our research



## REFERENCES

1. Yang J, Zheng Y, Gou X, et al. Prevalence of comorbidities and its effects in patients infected with SARS-CoV-2: a systematic review and meta-analysis. *Int J Infect Dis.* 2020; 94: 91-95.
2. Liang WH, Guan WJ, Li CC, et al. Clinical characteristics and outcomes of hospitalised patients with COVID-19 treated in Hubei (epicenter) and outside Hubei (non-epicenter): A Nationwide Analysis of China. *Eur Respir J.* 2020: 2000562.
3. Grasselli G, Zangrillo A, Zanella A, et al. Baseline Characteristics and Outcomes of 1591 Patients Infected With SARS-CoV-2 Admitted to ICUs of the Lombardy Region, Italy. *JAMA* 2020; 323:1574-1581.
4. Zhou F, Yu T, Du R, et al. Clinical course and risk factors for mortality of adult inpatients with COVID-19 in Wuhan, China: a retrospective cohort study. *Lancet* 2020; 395:1054-62.
5. de Lusignan S, Dorward J, Correa A, et al. Risk factors for SARS-CoV-2 among patients in the Oxford Royal College of General Practitioners Research and Surveillance Centre primary care network: a cross-sectional study. *Lancet Infect Dis.* 2020;20(9):1034-1042.
6. Chang TS, Ding Y, Freund MK, et al. Prior diagnoses and medications as risk factors for COVID-19 in a Los Angeles Health System. Preprint. medRxiv. 2020;2020.07.03.20145581. Published 2020 Jul 4.
7. Ssentongo P, Ssentongo AE, Heilbrunn ES, Ba DM, Chinchilli VM. Association of cardiovascular disease and 10 other pre-existing comorbidities with COVID-19 mortality: A systematic review and meta-analysis. *PLoS One.* 2020;15(8):e0238215.
8. Vahidy FS, Nicolas JC, Meeks JR, et al. Racial and ethnic disparities in SARS-CoV-2 pandemic: analysis of a COVID-19 observational registry for a diverse US metropolitan population. *BMJ Open.* 2020;10(8):e039849.
9. IDESCAT. Statistical Institute of Catalonia. Available at: <https://www.idescat.cat/?lang=en>. [Accessed 2 October 2020]
10. World Medical Association. WMA Declaration of Helsinki – Ethical Principles for Medical Research Involving Human Subjects. Available at: <https://www.wma.net/policies-post/wmadeclaration-of-helsinki-ethical-principles-for-medical-research-involving-human-subjects/>. [Accessed 14 May 2020].
11. Vila-Corcoles A, Hospital-Guardiola I, Ochoa-Gondar O, et al. Rationale and design of the CAPAMIS study: effectiveness of pneumococcal vaccination against community-acquired pneumonia, acute myocardial infarction and stroke. *BMC Public Health.* 2010;10:25.
12. Generalitat de Catalunya. Sub-direcció General de Vigilància i Resposta a Emergències de Salut Pública. Procediment d'actuació enfront de casos d'infecció pel nou coronavirus SARSCoV-2. Available at: [https://canalsalut.gencat.cat/web/.content/\\_A-Z/C/coronavirus-2019-ncov/material-divulgatiu/procediment-actuacio-coronavirus.pdf](https://canalsalut.gencat.cat/web/.content/_A-Z/C/coronavirus-2019-ncov/material-divulgatiu/procediment-actuacio-coronavirus.pdf) [Accessed 16 May 2020]
13. Lieberman JA, Pepper G, Naccache SN, et al. Comparison of commercially available and laboratory developed assays for in vitro detection of sars-cov-2 in clinical laboratories. *J Clin Microbiol.* 2020:JCM.00821-20.
14. Who Collaborating Centre for Drug Statistics Methodology. ATC/DDD Index 2020, Available at: [https://www.whocc.no/atc\\_ddd\\_index/](https://www.whocc.no/atc_ddd_index/) [Accessed 12 May 2020].
15. Vila-Corcoles A, Satue-Gracia E, Ochoa-Gondar O, et al. Use of distinct anti-hypertensive drugs and risk for COVID-19 among hypertensive people: a population-based cohort study in Southern Catalonia, Spain. *The Journal of Clinical Hypertension.* 2020 Aug;22(8):1379-88.
16. Gobierno de España. Secretaría General de Sanidad y Consumo. Dirección General de Salud Pública, Calidad e innovación. Centro de Coordinación de Alertas y Emergencias Sanitarias. Información científica-técnica. Enfermedad por coronavirus, COVID19. Actualización 17 de abril, Available at:

1  
2  
3 [https://www.mscbs.gob.es/profesionales/saludPublica/ccayes/alertasActual/nCov/documentos/20200417\\_ITCoronavirus.pdf](https://www.mscbs.gob.es/profesionales/saludPublica/ccayes/alertasActual/nCov/documentos/20200417_ITCoronavirus.pdf) [Accessed 5 May 2020].

4  
5 17. Deng G, Yin M, Chen X, Zeng F. Clinical determinants for fatality of 44,672 patients with  
6 COVID-19. *CritCare*. 2020; 24:179.

7  
8 18. Guzik TJ, Mohiddin SA, Dimarco A, et al. COVID-19 and the cardiovascular system:  
9 implications for risk assessment, diagnosis, and treatment options. *Cardiovasc Res*.  
10 2020;116(10):1666-1687.

11 19. Cook TM. The importance of hypertension as a risk factor for severe illness and mortality in  
12 COVID-19. *Anaesthesia*. 2020; 75:976-977.

13 20. Sattar N, McInnes IB, McMurray JJV. Obesity Is a Risk Factor for Severe COVID-19  
14 Infection: Multiple Potential Mechanisms. *Circulation*. 2020;142(1):4-6.

15 21. Miyara M, Tubach F, Pourcher V, et al. Low incidence of daily active tobacco smoking in  
16 patients with symptomatic COVID-19. *Qeios*. doi:10.32388/WPP19W.2. Preprint v3. Available  
17 at: <https://www.qeios.com/read/WPP19W.3> [Accessed 21 April 2020]

18 22. Lippi G, Henry BM. Active smoking is not associated with severity of coronavirus disease  
19 2019 (COVID-19). *Eur J Intern Med*. 2020; 75:107-108.

20 23. Changeux JP, Amoura Z, Rey FA, Miyara M. A nicotinic hypothesis for Covid-19 with  
21 preventive and therapeutic implications. *C R Biol*. 2020;343(1):33-39. Published 2020 Jun 5.

22 24. Wan Y, Shang J, Graham R, Baric RS, Li F. Receptor recognition by novel coronavirus from  
23 Wuhan: An analysis based on decade-long structural studies of SARS. *J Virology*. 2020;  
24 94:e00127-20.

25 25. Yan R, Zhang Y, Li Y, Xia L, Guo Y, Zhou Q. Structural basis for the recognition of  
26 SARS-CoV-2 by full-length human ACE2. *Science* 2020; 367:1444-8.

27 26. Esler M, Esler D. Can angiotensin receptor-blocking drugs perhaps be harmful in the COVID-  
28 19 pandemic?. *J Hypertens*. 2020; 38(5):781-782.

29 27. Versmissen J, Verdonk K, Lafeber M, et al. Angiotensin-converting enzyme-2 in SARS-CoV-  
30 2 infection: good or bad?. *J Hypertens*. 2020;38:1196-1197.

31 28. de Abajo FJ, Rodríguez-Martín S, Lerma V, et al. Use of renin-angiotensin-aldosterone  
32 system inhibitors and risk of COVID-19 requiring admission to hospital: a case-population study.  
33 *Lancet*. 2020;395(10238):1705-1714.

34 29. Reynolds HR, Adhikari S, Pulgarin C, et al. Renin-Angiotensin-Aldosterone System  
35 Inhibitors and Risk of Covid-19. *N Engl J Med*. 2020;382(25):2441-2448.

36 30. Kai H, Kai M. Interactions of coronaviruses with ACE2, angiotensin II, and RAS inhibitors-  
37 lessons from available evidence and insights into COVID-19. *Hypertens Res*. 2020;1-7.

38 31. Meng J, Xiao G, Zhang J, et al. Renin-angiotensin system inhibitors improve the clinical  
39 outcomes of COVID-19 patients with hypertension. *Emerg Microbes Infect*. 2020; 9:757-760.

40 32. Kreutz R, Algharably EAE, Azizi M, et al. Hypertension, the renin-angiotensin system, and  
41 the risk of lower respiratory tract infections and lung injury: implications for COVID-19.  
42 *Cardiovasc Res*. 2020;116(10):1688-1699.

43 33. Zhang P, Zhu L, Cai J, et al. Association of Inpatient Use of Angiotensin-Converting Enzyme  
44 Inhibitors and Angiotensin II Receptor Blockers With Mortality Among Patients With  
45 Hypertension Hospitalized With COVID-19 [published correction appears in *Circ Res*. 2020 Aug  
46 28;127(6):e147. Rohit, Loomba [corrected to Loomba, Rohit]]. *Circ Res*. 2020;126(12):1671-  
47 1681.

48 34. Testa S, Prandoni P, Paoletti O, et al. Direct oral anticoagulant plasma levels' striking  
49 increase in severe COVID-19 respiratory syndrome patients treated with antiviral agents: The  
50 Cremona experience. *J Thromb Haemost*. 2020; 00: 1-4.

51 35. Castiglione V, Chiriaco M, Emdin M, Taddei S, Vergaro G. Statin therapy in COVID-19  
52 infection. *Eur Heart J Cardiovasc Pharmacother*. 2020;6(4):258-259.

- 1  
2  
3 36. Wang Y, Jiang W, He Q, et al. Early, low-dose and short-term application of corticosteroid  
4 treatment in patients with severe COVID-19 pneumonia: single-center experience from Wuhan,  
5 China. medRxiv. Preprint posted March 12, 2020. doi:10.1101/2020.03.06.20032342v1  
6 Available at: <https://www.medrxiv.org/node/73427.external-links.html> [Accessed 4 May 4 2020]  
7  
8 37. Russell B, Moss C, Rigg A, et al. COVID-19 and treatment with NSAIDs and corticosteroids:  
9 should we be limiting their use in the clinical setting?. *Ecancermedicalsecience*. 2020;14:1023.  
10  
11 38. Hernandez AV, Roman YM, Pasupuleti V, et al. Hydroxychloroquine or Chloroquine for  
12 Treatment or Prophylaxis of COVID-19: A Living Systematic Review *Ann Intern Med*.  
13 2020;10.7326/M20-2496.  
14  
15 39. Simons FE, Simons KJ. Histamine and H1-antihistamines: celebrating a century of  
16 progress. *J Allergy Clin Immunol*. 2011; 128: 1139-1150.  
17  
18 40. Freedberg DE, Conigliaro J, Wang TC, et al. Famotidine use is associated with improved  
19 clinical outcomes in hospitalized COVID-19 patients: A propensity score matched retrospective  
20 cohort study. *Gastroenterology*. 2020; S0016-5085.  
21  
22 41. Salem ML, El-Hennawy D. The possible beneficial adjuvant effect of influenza vaccine to  
23 minimize the severity of COVID-19. *Med Hypotheses* 2020;140:109752.  
24  
25  
26  
27  
28  
29  
30  
31  
32  
33  
34  
35  
36  
37  
38  
39  
40  
41  
42  
43  
44  
45  
46  
47  
48  
49  
50  
51  
52  
53  
54  
55  
56  
57  
58  
59  
60

## TABLES

Table 1. Incidence of PCR-confirmed COVID-19 cases according to baseline demographical and clinical characteristics (comorbidities/medications) in the total study cohort (N=79,083). Tarragona region (Southern Catalonia, Spain), 01/03/2020-23/05/2020.

| Characteristic                     | Study population<br>(N=79083)<br>n (%) | PCR-confirmed COVID-19 cases (n=380) |                          |
|------------------------------------|----------------------------------------|--------------------------------------|--------------------------|
|                                    |                                        | Univariate analysis<br>n (%) p-value | Incidence rate           |
| <b>Sociodemographical</b>          |                                        |                                      |                          |
| <b>Age:</b> 50-64 yrs              | 42684 (54.0)                           | 101 (26.6) <0.001                    | 236.6 (193.6-288.7)      |
| 65-79 yrs                          | 26013 (32.9)                           | 95 (25.0)                            | 365.2 (295.4-452.9)      |
| ≥80 yrs                            | 10386 (13.1)                           | 184 (48.4)                           | 1771.6 (1527.1-2055.1)   |
| <b>Sex</b> Men                     | 37626 (47.6)                           | 158 (41.6) 0.019                     | 419.9 (358.6-491.7)      |
| Women                              | 41457 (52.4)                           | 222 (58.4)                           | 535.5 (464.8-616.4)      |
| <b>Community-dwelling</b>          | 77676 (98.2)                           | 220 (57.9) <0.001                    | 283.2 (245.8-326.0)      |
| <b>Nursing-home residence</b>      | 1407 (1.8)                             | 160 (42.1)                           | 11371.7 (9711.4-13316.3) |
| <b>Comorbidities</b>               |                                        |                                      |                          |
| <b>Neurological disease</b>        | 2317 (2.9)                             | 66 (17.4) <0.001                     | 2848.5 (2236.1-3617.6)   |
| <b>Renal disease</b>               | 4476 (5.7)                             | 49 (12.9) <0.001                     | 1094.7 (812.3-1445.0)    |
| <b>Cancer</b>                      | 6630 (8.4)                             | 49 (12.9) 0.001                      | 739.1 (548.4-975.6)      |
| <b>Rheumatic disease</b>           | 872 (1.1)                              | 2 (0.5) 0.281                        | 229.4 (27.8-828.0)       |
| <b>Respiratory disease</b>         | 7272 (9.2)                             | 63 (16.6) <0.001                     | 866.3 (667.1-1126.2)     |
| <b>Cardiac disease</b>             | 13435 (17.0)                           | 123 (32.4) <0.001                    | 915.5 (762.6-1098.6)     |
| <b>Atrial fibrillation</b>         | 3786 (4.8)                             | 55 (14.5) <0.001                     | 1452.7 (1077.9-1917.6)   |
| <b>Liver disease</b>               | 1465 (1.9)                             | 8 (2.1) 0.714                        | 546.1 (235.4-1075.8)     |
| <b>Diabetes</b>                    | 13317 (16.8)                           | 102 (26.8) <0.001                    | 765.9 (626.5-934.4)      |
| <b>Hypertension</b>                | 34945 (44.2)                           | 223 (58.7) <0.001                    | 638.1 (553.9-734.5)      |
| <b>Hypercholesterolemia</b>        | 27314 (34.5)                           | 133 (35.0) 0.850                     | 486.9 (411.0-576.5)      |
| <b>Obesity</b>                     | 21678 (27.4)                           | 96 (25.3) 0.347                      | 442.8 (362.2-540.3)      |
| <b>Smoking</b>                     | 12750 (16.1)                           | 27 (7.1) <0.001                      | 211.8 (139.6-309.2)      |
| <b>Chronic medications use</b>     |                                        |                                      |                          |
| <b>Diuretics</b>                   | 8481 (10.7)                            | 111 (29.2) <0.001                    | 1308.8 (1090.2-1570.6)   |
| <b>Beta blockers</b>               | 9571 (12.1)                            | 68 (17.9) 0.001                      | 710.5 (557.7-902.3)      |
| <b>ACEIs</b>                       | 16419 (20.8)                           | 92 (24.2) 0.097                      | 560.3 (453.3-694.8)      |
| <b>ARBs</b>                        | 8869 (11.2)                            | 39 (10.3) 0.556                      | 439.7 (314.0-598.0)      |
| <b>Calcium channel blockers</b>    | 6490 (8.2)                             | 52 (13.7) <0.001                     | 801.2 (594.5-1057.6)     |
| <b>Statins</b>                     | 16134 (20.4)                           | 69 (18.2) 0.277                      | 427.7 (335.7-543.1)      |
| <b>Oral anticoagulants</b>         | 3912 (4.9)                             | 46 (12.1) <0.001                     | 1175.9 (857.2-1575.7)    |
| <b>Antiplatelet drugs</b>          | 9154 (11.6)                            | 86 (22.6) <0.001                     | 939.5 (760.0-1165.0)     |
| <b>Insulin</b>                     | 3042 (3.8)                             | 39 (10.3) <0.001                     | 1282.1 (915.4-1743.6)    |
| <b>Oral antidiabetic drugs</b>     | 10585 (13.4)                           | 69 (18.2) 0.006                      | 651.9 (511.7-827.9)      |
| <b>Inhaled respiratory drugs</b>   | 6293 (8.0)                             | 61 (16.1) <0.001                     | 969.3 (746.4-1260.1)     |
| <b>Antineoplastic agents</b>       | 1614 (2.0)                             | 8 (2.1) 0.929                        | 495.7 (213.6-976.5)      |
| <b>Systemic corticosteroids</b>    | 1252 (1.6)                             | 5 (1.3) 0.676                        | 399.4 (129.4-930.5)      |
| <b>NSADs</b>                       | 4321 (5.5)                             | 12 (3.2) 0.047                       | 277.7 (143.6-486.0)      |
| <b>Chloroquine</b>                 | 168 (0.2)                              | 0 (0.0) 0.367                        | 0 (-)                    |
| <b>Antihistamines</b>              | 3264 (4.1)                             | 7 (1.8) 0.025                        | 214.5 (86.0-446.1)       |
| <b>Proton-Pump Inhibitors</b>      | 17931 (22.7)                           | 142 (37.4) <0.001                    | 791.9 (668.4-937.6)      |
| <b>Benzodiazepines</b>             | 13046 (16.5)                           | 96 (25.3) <0.001                     | 735.9 (601.9-897.7)      |
| <b>Vaccination's history</b>       |                                        |                                      |                          |
| <b>Flu vaccine in prior autumn</b> | 22606 (28.6)                           | 205 (53.9) <0.001                    | 906.8 (787.1-1043.8)     |
| <b>Pneumococcal vaccinated</b>     | 26183 (33.1)                           | 213 (56.1) <0.001                    | 813.5 (706.1-936.3)      |

NOTE: P-values in univariate analysis were calculated by chi-squared, or Fisher's test as appropriate, comparing percentages in the study population vs COVID-19 cases; IR denotes incidence rates per 100,000 persons period (12 weeks); CIs denotes confidence intervals for incidence rates and were calculated assuming a Poisson distribution for uncommon events.

Table 2. Cox regression analyses assessing unadjusted and adjusted risks to suffer PCR-confirmed COVID-19 in the total study cohort (N=79,083). Tarragona region (Southern Catalonia, Spain) from 01/03/2020 to 23/05/2020.

| Characteristic                 | LC-COVID-19 cases (n=349)         |                                 |
|--------------------------------|-----------------------------------|---------------------------------|
|                                | Unadjusted<br>HR (95% CI) p-value | Adjusted<br>HR (95% CI) p-value |
| <b>Sociodemographical</b>      |                                   |                                 |
| Age (continuous yrs)           | 1.07 (1.07-1.08) <0.001           | 1.02 (1.01-1.03) 0.002          |
| Sex: women                     | 1.28 (1.04-1.57) 0.019            | 0.95 (0.76-1.18) 0.624          |
| Nursing-home residence         | 42.14 (34.37-51.66) <0.001        | 21.83 (16.66-28.61) <0.001      |
| <b>Comorbidities</b>           |                                   |                                 |
| Neurological disease           | 7.03 (5.39-9.16) <0.001           | 1.31 (0.97-1.77) 0.074          |
| Renal disease                  | 2.47 (1.83-3.34) <0.001           | 0.91 (0.66-1.26) 0.556          |
| Cancer                         | 1.62 (1.20-2.19) 0.002            | 1.17 (0.86-1.60) 0.315          |
| Rheumatic disease              | 0.47 (0.12-1.90) 0.293            | 0.54 (0.13-2.19) 0.386          |
| Respiratory disease            | 1.97 (1.50-2.58) <0.001           | 1.29 (0.89-1.87) 0.184          |
| Cardiac disease                | 2.34 (1.89-2.90) <0.001           | 1.04 (0.80-1.34) 0.790          |
| Atrial fibrillation            | 3.38 (2.54-4.50) <0.001           | 1.17 (0.74-1.84) 0.514          |
| Liver disease                  | 1.14 (0.57-2.30) 0.712            | 1.16 (0.57-2.35) 0.684          |
| Diabetes                       | 1.81 (1.45-2.27) <0.001           | 1.10 (0.73-1.65) 0.646          |
| Hypertension                   | 1.80 (1.46-2.20) <0.001           | 0.98 (0.74-1.29) 0.869          |
| Hypercholesterolemia           | 1.02 (0.83-1.26) 0.851            | 0.88 (0.70-1.11) 0.269          |
| Obesity                        | 0.89 (0.71-1.13) 0.344            | 0.87 (0.68-1.11) 0.262          |
| Smoking                        | 0.40 (0.27-0.59) <0.001           | 0.62 (0.41-0.93) 0.022          |
| <b>Chronic medications use</b> |                                   |                                 |
| Diuretics                      | 3.45 (2.76-4.30) <0.001           | 1.35 (1.04-1.76) 0.026          |
| Beta blockers                  | 1.59 (1.22-2.06) 0.001            | 0.96 (0.72-1.29) 0.790          |
| ACEIs                          | 1.22 (0.96-1.54) 0.098            | 0.85 (0.65-1.13) 0.260          |
| ARBs                           | 0.90 (0.65-1.26) 0.552            | 0.68 (0.47-0.99) 0.046          |
| Calcium channel blockers       | 1.77 (1.32-2.38) <0.001           | 1.31 (0.95-1.79) 0.096          |
| Statins                        | 0.87 (0.67-1.12) 0.276            | 0.82 (0.60-1.11) 0.200          |
| Oral anticoagulants            | 2.65 (1.95-3.61) <0.001           | 1.26 (0.76-2.07) 0.371          |
| Antiplatelet drugs             | 2.24 (1.76-2.85) <0.001           | 1.35 (1.00-1.81) 0.051          |
| Insulin                        | 2.87 (2.06-3.99) <0.001           | 1.47 (0.98-2.21) 0.065          |
| Oral antidiabetic drugs        | 1.44 (1.11-1.86) 0.007            | 1.05 (0.69-1.59) 0.823          |
| Inhaled respiratory drugs      | 2.22 (1.69-2.92) <0.001           | 1.24 (0.84-1.81) 0.275          |
| Antineoplastic agents          | 1.03 (0.51-2.08) 0.929            | 1.06 (0.51-2.20) 0.876          |
| Systemic corticosteroids       | 0.83 (0.34-2.00) 0.677            | 0.57 (0.23-1.40) 0.218          |
| NSADs                          | 0.57 (0.32-1.00) 0.051            | 1.04 (0.58-1.87) 0.901          |
| Antihistamines                 | 0.44 (0.21-0.92) 0.029            | 0.47 (0.22-1.01) 0.052          |
| Proton-Pump Inhibitors         | 2.04 (1.66-2.51) <0.001           | 0.93 (0.72-1.19) 0.557          |
| Benzodiazepines                | 1.72 (1.36-2.16) <0.001           | 1.25 (0.98-1.60) 0.072          |
| <b>Vaccination's history</b>   |                                   |                                 |
| Flu vaccine in prior autumn    | 2.93 (2.40-3.59) <0.001           | 1.02 (0.79-1.32) 0.878          |
| Pneumococcal vaccination       | 2.58 (2.11-3.16) <0.001           | 1.02 (0.78-1.33) 0.904          |

NOTE: HRs denotes Hazard ratios, and were calculated for those who had the condition as compared with those who had not the condition. In adjusted analysis the HRs were adjusted for age (continuous years), sex, residence, comorbidities/underlying conditions and chronic medications use. CIs denote confidence intervals.

Table 3. Incidence of PCR-confirmed COVID-19 cases according to baseline demographical and clinical characteristics (comorbidities/medications) in subgroup analysis restricted to community-dwelling individuals (N=77,676). Tarragona region (Southern Catalonia, Spain), 01/03/2020-23/05/2020.

| Characteristic                     | Study population<br>(N=77676)<br>n (%) | PCR-confirmed COVID-19 cases (n=220) |                      |
|------------------------------------|----------------------------------------|--------------------------------------|----------------------|
|                                    |                                        | Univariate analysis<br>n (%) p-value | Incidence rate       |
| <b>Sociodemographical</b>          |                                        |                                      |                      |
| <b>Age:</b> 50-64 yrs              | 42533 (54.8)                           | 99 (45.0) <0.001                     | 232.8 (190.4-284.0)  |
| 65-79 yrs                          | 25713 (33.1)                           | 72 (32.7)                            | 280.0 (219.8-355.6)  |
| ≥80 yrs                            | 9430 (12.1)                            | 49 (22.3)                            | 519.6 (385.6-685.9)  |
| <b>Sex</b> Men                     | 37145 (47.8)                           | 108 (49.1) 0.706                     | 290.8 (237.8-354.7)  |
| Women                              | 40531 (52.2)                           | 112 (50.9)                           | 276.3 (230.2-331.6)  |
| <b>Comorbidities</b>               |                                        |                                      |                      |
| <b>Neurological disease</b>        | 1951 (2.5)                             | 11 (5.0) 0.018                       | 563.8 (281.3-1009.2) |
| <b>Renal disease</b>               | 4240 (5.5)                             | 26 (11.8) <0.001                     | 613.2 (400.4-901.4)  |
| <b>Cancer</b>                      | 6463 (8.3)                             | 32 (14.5) 0.001                      | 495.1 (334.2-708.0)  |
| <b>Rheumatic disease</b>           | 860 (1.1)                              | 1 (0.5) 0.354                        | 116.3 (2.9-647.7)    |
| <b>Respiratory disease</b>         | 7075 (9.1)                             | 47 (21.4) <0.001                     | 664.3 (484.3-890.2)  |
| <b>Cardiac disease</b>             | 12925 (16.6)                           | 68 (30.9) <0.001                     | 526.1 (413.0-668.2)  |
| <b>Atrial fibrillation</b>         | 3561 (4.6)                             | 26 (11.8) <0.001                     | 730.1 (476.8-1073.3) |
| <b>Liver disease</b>               | 1438 (1.9)                             | 6 (2.7) 0.334                        | 417.2 (153.1-909.6)  |
| <b>Diabetes</b>                    | 12926 (16.6)                           | 50 (22.7) 0.015                      | 386.8 (287.0-510.6)  |
| <b>Hypertension</b>                | 33996 (43.8)                           | 112 (50.9) 0.032                     | 329.5 (274.4-395.3)  |
| <b>Hypercholesterolemia</b>        | 26766 (34.5)                           | 74 (33.6) 0.797                      | 276.5 (217.0-351.1)  |
| <b>Obesity</b>                     | 21344 (27.5)                           | 57 (25.9) 0.602                      | 267.1 (205.6-347.2)  |
| <b>Smoking</b>                     | 12640 (16.3)                           | 19 (8.6) 0.002                       | 150.3 (90.5-234.5)   |
| <b>Chronic medications use</b>     |                                        |                                      |                      |
| <b>Diuretics</b>                   | 8028 (10.3)                            | 51 (23.2) <0.001                     | 635.3 (471.4-838.6)  |
| <b>Beta blockers</b>               | 9312 (12.0)                            | 40 (18.2) 0.005                      | 429.6 (306.7-584.2)  |
| <b>ACEIs</b>                       | 16031 (20.6)                           | 41 (18.6) 0.462                      | 255.8 (182.6-347.8)  |
| <b>ARBs</b>                        | 8709 (11.2)                            | 29 (13.2) 0.354                      | 333.0 (223.1-479.5)  |
| <b>Calcium channel blockers</b>    | 6316 (8.1)                             | 27 (12.3) 0.024                      | 427.5 (281.7-624.1)  |
| <b>Statins</b>                     | 15911 (20.5)                           | 47 (21.4) 0.746                      | 295.4 (215.3-395.8)  |
| <b>Oral anticoagulants</b>         | 3741 (4.8)                             | 27 (12.3) <0.001                     | 721.7 (475.6-1053.7) |
| <b>Antiplatelet drugs</b>          | 8810 (11.3)                            | 40 (18.2) 0.001                      | 454.0 (324.2-617.5)  |
| <b>Insulin</b>                     | 2904 (3.7)                             | 20 (9.1) <0.001                      | 688.7 (420.8-1060.6) |
| <b>Oral antidiabetic drugs</b>     | 10352 (13.3)                           | 34 (15.5) 0.353                      | 328.4 (228.9-456.5)  |
| <b>Inhaled respiratory drugs</b>   | 6095 (7.8)                             | 42 (19.1) <0.001                     | 689.1 (492.0-937.2)  |
| <b>Antineoplastic agents</b>       | 1581 (2.0)                             | 2 (0.9) 0.236                        | 126.5 (15.3-456.7)   |
| <b>Systemic corticosteroids</b>    | 1216 (1.6)                             | 5 (2.3) 0.397                        | 411.2 (133.2-958.1)  |
| <b>NSADs</b>                       | 4305 (5.5)                             | 12 (5.5) 0.955                       | 278.7 (144.1-487.8)  |
| <b>Antihistamines</b>              | 3221 (4.1)                             | 6 (2.7) 0.290                        | 186.3 (68.4-406.1)   |
| <b>Proton-Pump Inhibitors</b>      | 17315 (22.3)                           | 74 (33.6) <0.001                     | 427.4 (335.5-542.8)  |
| <b>Benzodiazepines</b>             | 12654 (16.3)                           | 49 (22.3) 0.016                      | 387.2 (287.3-511.1)  |
| <b>Vaccination's history</b>       |                                        |                                      |                      |
| <b>Flu vaccine in prior autumn</b> | 21570 (27.8)                           | 70 (31.8) 0.179                      | 324.5 (254.8-412.1)  |
| <b>Pneumococcal vaccinated</b>     | 25224 (32.5)                           | 100 (45.5) <0.001                    | 396.4 (324.3-483.7)  |

NOTE: P-values in univariate analysis were calculated by chi-squared, or Fisher's test as appropriate, comparing percentages in the study population vs COVID-19 cases; IR denotes incidence rates per 100.000 persons period (12 weeks); CIs denotes confidence intervals for incidence rates and were calculated assuming a Poisson distribution for uncommon events.

Table 4. Cox regression analyses assessing unadjusted and adjusted risks to suffer PCR-confirmed COVID-19 among community-dwelling individuals (N=77,676). Tarragona region (Southern Catalonia, Spain), 01/03/2020-23/05/2020.

| Characteristic                 | LC-COVID-19 cases (n=201)         |                                 |
|--------------------------------|-----------------------------------|---------------------------------|
|                                | Unadjusted<br>HR (95% CI) p-value | Adjusted<br>HR (95% CI) p-value |
| <b>Sociodemographical</b>      |                                   |                                 |
| Age (continuous yrs)           | 1.03 (1.02-1.04) <0.001           | 1.01 (0.99-1.02) 0.573          |
| Sex: women                     | 0.95 (0.73-1.24) 0.708            | 0.97 (0.73-1.28) 0.807          |
| <b>Comorbidities</b>           |                                   |                                 |
| Neurological disease           | 2.04 (1.12-3.75) 0.021            | 1.06 (0.56-2.01) 0.857          |
| Renal disease                  | 2.32 (1.54-3.50) <0.001           | 1.22 (0.77-1.94) 0.398          |
| Cancer                         | 1.88 (1.29-2.73) 0.001            | 1.52 (1.03-2.24) 0.035          |
| Rheumatic disease              | 0.41 (0.06-2.91) 0.371            | 0.41 (0.06-2.97) 0.375          |
| Respiratory disease            | 2.72 (1.97-3.75) <0.001           | 1.82 (1.08-3.07) 0.025          |
| Cardiac disease                | 2.24 (1.69-2.99) <0.001           | 1.53 (1.06-2.19) 0.021          |
| Atrial fibrillation            | 2.79 (1.86-4.21) <0.001           | 1.06 (0.48-2.33) 0.882          |
| Liver disease                  | 1.49 (0.66-3.35) 0.336            | 1.24 (0.54-2.83) 0.608          |
| Diabetes                       | 1.47 (1.08-2.02) 0.016            | 1.26 (0.70-2.28) 0.441          |
| Hypertension                   | 1.33 (1.02-1.74) 0.034            | 1.06 (0.72-1.55) 0.785          |
| Hypercholesterolemia           | 0.96 (0.73-1.28) 0.798            | 0.88 (0.64-1.20) 0.405          |
| Obesity                        | 0.92 (0.68-1.25) 0.599            | 0.75 (0.54-1.03) 0.076          |
| Smoking                        | 0.49 (0.30-0.78) 0.003            | 0.49 (0.30-0.80) 0.004          |
| <b>Chronic medications use</b> |                                   |                                 |
| Diuretics                      | 2.62 (1.92-3.58) <0.001           | 1.54 (1.04-2.27) 0.031          |
| Beta blockers                  | 1.63 (1.16-2.30) 0.005            | 1.02 (0.69-1.52) 0.909          |
| ACEIs                          | 0.88 (0.63-1.24) 0.462            | 0.66 (0.44-0.99) 0.046          |
| ARBs                           | 1.20 (0.81-1.78) 0.356            | 0.75 (0.47-1.19) 0.222          |
| Calcium channel blockers       | 1.58 (1.06-2.36) 0.026            | 1.21 (0.78-1.87) 0.395          |
| Statins                        | 1.05 (0.76-1.46) 0.747            | 0.72 (0.49-1.06) 0.094          |
| Oral anticoagulants            | 2.77 (1.85-4.14) <0.001           | 1.58 (0.71-3.48) 0.261          |
| Antiplatelet drugs             | 1.74 (1.23-2.45) 0.002            | 1.30 (0.84-2.02) 0.243          |
| Insulin                        | 2.58 (1.63-4.08) <0.001           | 1.79 (1.00-3.21) 0.059          |
| Oral antidiabetic drugs        | 1.19 (0.82-1.71) 0.356            | 0.73 (0.40-1.32) 0.295          |
| Inhaled respiratory drugs      | 2.78 (1.99-3.89) <0.001           | 1.41 (0.81-2.45) 0.225          |
| Antineoplastic agents          | 0.44 (0.11-1.78) 0.250            | 0.36 (0.09-1.49) 0.159          |
| Systemic corticosteroids       | 1.46 (0.60-3.55) 0.400            | 1.03 (0.41-2.58) 0.945          |
| NSADs                          | 0.99 (0.55-1.76) 0.959            | 1.17 (0.65-2.12) 0.600          |
| Antihistamines                 | 0.65 (0.29-1.46) 0.294            | 0.51 (0.23-1.16) 0.109          |
| Proton-Pump Inhibitors         | 1.77 (1.34-2.34) <0.001           | 1.11 (0.79-1.57) 0.555          |
| Benzodiazepines                | 1.48 (1.07-2.03) 0.017            | 1.26 (0.90-1.76) 0.186          |
| <b>Vaccination's history</b>   |                                   |                                 |
| Flu vaccine in prior autumn    | 1.21 (0.91-1.61) 0.182            | 0.63 (0.44-0.91) 0.012          |
| Pneumococcal vaccination       | 1.73 (1.33-2.26) <0.001           | 1.29 (0.86-1.92) 0.214          |

NOTE: HRs denotes Hazard ratios, and were calculated for those who had the condition as compared with those who had not the condition. In multivariable-adjusted analysis, HRs were adjusted for age (continuous years), sex, residence, comorbidities/underlying conditions and chronic medications use. CIs denote confidence intervals.

Table 5. Univariate and multivariate analyses on laboratory-confirmed COVID-19 cases according to baseline demographical and clinical characteristics (comorbidities/medications) in subgroup analysis restricted to nursing-home residents (N=1407). Tarragona region (Southern Catalonia, Spain) from 01/03/2020 to 23/05/2020.

| Characteristic                     | Study population<br>(N=1407)<br>n (%) | PCR-confirmed COVID-19 cases (n=160) |                                              |
|------------------------------------|---------------------------------------|--------------------------------------|----------------------------------------------|
|                                    |                                       | Univariate analysis<br>n (%) p value | Multivariate analysis<br>HR (95% CI) p value |
| <b>Sociodemographical</b>          |                                       |                                      |                                              |
| <b>Age:</b> 50-64 yrs              | 151 (10.7)                            | 2 (1.3) <0.001                       | 1.00 (reference)                             |
| 65-79 yrs                          | 300 (21.3)                            | 23 (14.4)                            | 6.66 (1.53-29.02) 0.012                      |
| ≥80 yrs                            | 956 (67.9)                            | 135 (84.4)                           | 13.16 (3.09-56.00) <0.001                    |
| <b>Sex:</b> Men                    | 481 (34.2)                            | 50 (31.3) 0.406                      | 1.00 (reference)                             |
| Women                              | 926 (65.8)                            | 110 (68.8)                           | 0.85 (0.59-1.24) 0.402                       |
| <b>Comorbidities</b>               |                                       |                                      |                                              |
| <b>Neurological disease</b>        | 366 (26.0)                            | 55 (34.4) 0.010                      | 1.25 (0.89-1.76) 0.193                       |
| <b>Renal disease</b>               | 236 (16.8)                            | 23 (14.4) 0.388                      | 0.68 (0.43-1.08) 0.104                       |
| <b>Cancer</b>                      | 167 (11.9)                            | 17 (10.6) 0.605                      | 0.74 (0.43-1.26) 0.264                       |
| <b>Rheumatic disease</b>           | 12 (0.9)                              | 1 (0.6) 0.739                        | 0.86 (0.12-6.43) 0.885                       |
| <b>Respiratory disease</b>         | 197 (14.0)                            | 16 (10.0) 0.121                      | 0.72 (0.39-1.31) 0.280                       |
| <b>Cardiac disease</b>             | 510 (36.2)                            | 55 (34.4) 0.601                      | 0.76 (0.52-1.09) 0.137                       |
| <b>Atrial fibrillation</b>         | 225 (16.0)                            | 29 (18.1) 0.434                      | 1.25 (0.71-2.20) 0.436                       |
| <b>Liver disease</b>               | 27 (1.9)                              | 2 (1.3) 0.512                        | 0.70 (0.17-2.88) 0.618                       |
| <b>Diabetes</b>                    | 391 (27.8)                            | 52 (32.5) 0.158                      | 1.08 (0.63-1.85) 0.786                       |
| <b>Hypertension</b>                | 949 (67.4)                            | 111 (69.4) 0.581                     | 0.89 (0.60-1.33) 0.562                       |
| <b>Hypercholesterolemia</b>        | 548 (38.9)                            | 59 (36.9) 0.568                      | 0.90 (0.64-1.26) 0.525                       |
| <b>Obesity</b>                     | 334 (23.7)                            | 39 (24.4) 0.841                      | 1.10 (0.75-1.61) 0.617                       |
| <b>Smoking</b>                     | 8 (5.0)                               | 110 (7.8) 0.158                      | 1.47 (0.68-3.17) 0.323                       |
| <b>Chronic medications use</b>     |                                       |                                      |                                              |
| <b>Diuretics</b>                   | 453 (32.2)                            | 60 (37.5) 0.127                      | 1.19 (0.83-1.70) 0.342                       |
| <b>Beta blockers</b>               | 259 (18.4)                            | 28 (17.5) 0.753                      | 0.90 (0.57-1.41) 0.642                       |
| <b>ACEIs</b>                       | 388 (27.6)                            | 51 (31.9) 0.196                      | 1.01 (0.69-1.47) 0.981                       |
| <b>ARBs</b>                        | 160 (11.4)                            | 10 (6.3) 0.030                       | 0.45 (0.23-0.90) 0.023                       |
| <b>Calcium channel blockers</b>    | 174 (12.4)                            | 25 (15.6) 0.184                      | 1.34 (0.85-2.12) 0.214                       |
| <b>Statins</b>                     | 223 (15.8)                            | 22 (13.8) 0.440                      | 0.99 (0.59-1.64) 0.964                       |
| <b>Oral anticoagulants</b>         | 171 (12.2)                            | 19 (11.9) 0.909                      | 0.81 (0.41-1.59) 0.534                       |
| <b>Antiplatelet drugs</b>          | 344 (24.4)                            | 46 (28.7) 0.179                      | 1.30 (0.85-1.98) 0.227                       |
| <b>Insulin</b>                     | 138 (9.8)                             | 19 (11.9) 0.350                      | 1.05 (0.59-1.86) 0.880                       |
| <b>Oral antidiabetic drugs</b>     | 233 (16.6)                            | 35 (21.9) 0.055                      | 1.56 (0.88-2.77) 0.131                       |
| <b>Inhaled respiratory drugs</b>   | 198 (14.1)                            | 19 (11.9) 0.396                      | 0.93 (0.53-1.64) 0.808                       |
| <b>Antineoplastic agents</b>       | 33 (2.3)                              | 6 (3.8) 0.212                        | 3.27 (1.34-7.94) 0.009                       |
| <b>Systemic corticosteroids</b>    | 36 (2.6)                              | 0 (-) 0.029                          | NA (-) -                                     |
| <b>NSADs</b>                       | 16 (1.1)                              | 0 (-) 0.150                          | NA (-) -                                     |
| <b>Antihistamines</b>              | 43 (3.1)                              | 1 (0.6) 0.058                        | 0.21 (0.03-1.54) 0.125                       |
| <b>Proton-Pump Inhibitors</b>      | 616 (4.8)                             | 68 (42.5) 0.729                      | 0.82 (0.57-1.18) 0.286                       |
| <b>Benzodiazepines</b>             | 392 (27.9)                            | 47 (29.4) 0.650                      | 1.02 (0.72-1.46) 0.911                       |
| <b>Vaccination's history</b>       |                                       |                                      |                                              |
| <b>Flu vaccine in prior autumn</b> | 1036 (73.6)                           | 135 (84.4) 0.001                     | 1.61 (0.98-2.59) 0.071                       |
| <b>Pneumococcal vaccination</b>    | 959 (68.2)                            | 1130.6) 0.477                        | 0.77 (0.53-1.10) 0.148                       |

NOTE: p-values in univariate analysis were calculated by chi-squared (or Fisher's test as appropriate) comparing percentages in the study population vs COVID-19 cases; HR denotes multivariable-adjusted Hazard ratios (Cox regression) calculated for those who had the condition as compared with those who had not the condition, being adjusted by age (continuous), sex, pre-existing comorbidities and medications use.



1  
2  
3  
4  
5  
6  
7  
8  
9  
10  
11  
12  
13  
14  
15  
16  
17  
18  
19  
20  
21  
22  
23  
24  
25  
26  
27  
28  
29  
30  
31  
32  
33  
34  
35  
36  
37  
38  
39  
40  
41  
42  
43  
44  
45  
46  
47  
48  
49  
50  
51  
52  
53  
54  
55  
56  
57  
58  
59  
60

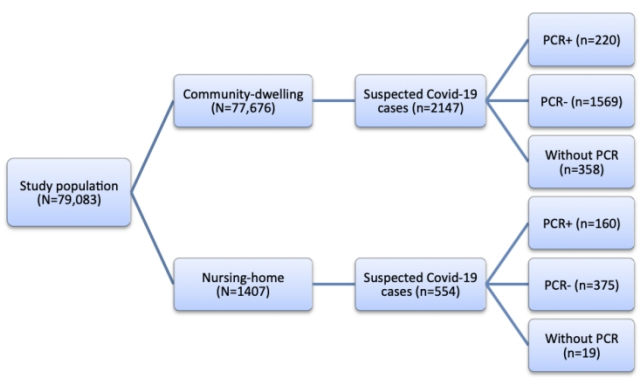

Figure 1. Flow diagram of the study  
209x297mm (150 x 150 DPI)

**APPENDIX. Criteria used to identify comorbidities and active medications in the study population.**

| Comorbidities and underlying conditions with ICD-10 codes [International Classification of Diseases, 10th Revision]                                                   |                                                          |
|-----------------------------------------------------------------------------------------------------------------------------------------------------------------------|----------------------------------------------------------|
| <b>Neurological disease:</b><br>Dementia<br>Ictus                                                                                                                     | F01-F03<br>I63, I61                                      |
| <b>Chronic renal failure</b>                                                                                                                                          | N18-N19                                                  |
| <b>Cancer</b> (solid organ or haematological neoplasia) in past 5 years                                                                                               | C00-C97                                                  |
| <b>Rheumatologic disease:</b><br>Rheumatoid arthritis, enteropathic arthropathies and juvenile arthritis<br>Systemic lupus erythematosus                              | M05-M09<br>M32                                           |
| <b>Chronic pulmonary/respiratory disease:</b><br>Chronic bronchitis/emphysema<br>Asthma<br>Other chronic pulmonary diseases                                           | J41-J44<br>J45-J46<br>P27, E84, J47                      |
| <b>Chronic heart disease:</b><br>Congestive heart failure<br>Coronary artery disease<br>Other chronic heart diseases                                                  | I50<br>I20-I22, I25<br>I05-I08, I11, I35-I37, I42, I51.7 |
| <b>Atrial Fibrillation</b>                                                                                                                                            | I48                                                      |
| <b>Chronic liver disease:</b><br>Chronic viral hepatitis<br>Cirrhosis<br>Alcoholic hepatitis                                                                          | B18<br>K74<br>K70                                        |
| <b>Diabetes mellitus</b>                                                                                                                                              | E10-E14                                                  |
| <b>Hypertension</b>                                                                                                                                                   | I10, I11, I12 o I15                                      |
| <b>Hypercholesterolemia</b>                                                                                                                                           | E78                                                      |
| <b>Obesity</b>                                                                                                                                                        | E66                                                      |
| <b>Smoking</b>                                                                                                                                                        | F17                                                      |
| Drugs identified in the patient treatment with codes of the Anatomical, Therapeutic, and Chemical classification system (ATC codes) of the World Health Organization: |                                                          |
| <b>Diuretics</b>                                                                                                                                                      | C03                                                      |
| <b>Beta blockers</b>                                                                                                                                                  | C07                                                      |
| <b>Angiotensin converter enzyme inhibitors (ACEIs)</b>                                                                                                                | C09A, C09B                                               |
| <b>Angiotensin II receptor blockers (ARBs)</b>                                                                                                                        | C09C, C09D                                               |
| <b>Calcium channel blockers</b>                                                                                                                                       | C08CA                                                    |
| <b>Statins</b>                                                                                                                                                        | C10AA                                                    |
| <b>Oral anticoagulant drugs</b>                                                                                                                                       | B01AA, B01AE, B01AF                                      |
| <b>Antiplatelet drugs</b>                                                                                                                                             | B01AC                                                    |
| <b>Insulin</b>                                                                                                                                                        | A10A                                                     |
| <b>Oral antidiabetic drugs</b>                                                                                                                                        | A10B                                                     |
| <b>Inhaled respiratory drugs</b>                                                                                                                                      | R03A, R03B                                               |
| <b>Antineoplastic agents</b>                                                                                                                                          | L01, L02B, L03, L04                                      |
| <b>Corticosteroids for systemic use</b>                                                                                                                               | H02A                                                     |
| <b>Non-steroids anti inflammatory drugs (NSADs)</b>                                                                                                                   | M01A                                                     |
| <b>Chloroquine/Hydroxychloroquine</b>                                                                                                                                 | P01BA01, P01BA02                                         |
| <b>Antihistamines for systemic use</b>                                                                                                                                | R06                                                      |
| <b>Proton pump inhibitors</b>                                                                                                                                         | A02BC                                                    |
| <b>Benzodiazepines</b>                                                                                                                                                | N05BA, N05CD, N05CF                                      |

STROBE Statement—Checklist of items that should be included in reports of *cohort studies*

|                              | Item No | Recommendation                                                                                                                                                                                                                                                                                                                                                          |
|------------------------------|---------|-------------------------------------------------------------------------------------------------------------------------------------------------------------------------------------------------------------------------------------------------------------------------------------------------------------------------------------------------------------------------|
| <b>Title and abstract</b>    | 1       | (a) Indicate the study's design with a commonly used term in the title or the abstract (p. 4) ✓<br>(b) Provide in the abstract an informative and balanced summary of what was done and what was found (p. 4) ✓                                                                                                                                                         |
| <b>Introduction</b>          |         |                                                                                                                                                                                                                                                                                                                                                                         |
| Background/rationale         | 2       | Explain the scientific background and rationale for the investigation being reported (p. 6) ✓                                                                                                                                                                                                                                                                           |
| Objectives                   | 3       | State specific objectives, including any prespecified hypotheses (p. 6) ✓                                                                                                                                                                                                                                                                                               |
| <b>Methods</b>               |         |                                                                                                                                                                                                                                                                                                                                                                         |
| Study design                 | 4       | Present key elements of study design early in the paper (p. 6) ✓                                                                                                                                                                                                                                                                                                        |
| Setting                      | 5       | Describe the setting, locations, and relevant dates, including periods of recruitment, exposure, follow-up, and data collection (p. 6-7) ✓                                                                                                                                                                                                                              |
| Participants                 | 6       | (a) Give the eligibility criteria, and the sources and methods of selection of participants. Describe methods of follow-up (p. 6) ✓<br>(b) For matched studies, give matching criteria and number of exposed and unexposed NOT APPLICABLE □                                                                                                                             |
| Variables                    | 7       | Clearly define all outcomes, exposures, predictors, potential confounders, and effect modifiers. Give diagnostic criteria, if applicable (p. 7-8) ✓                                                                                                                                                                                                                     |
| Data sources/<br>measurement | 8*      | For each variable of interest, give sources of data and details of methods of assessment (measurement). Describe comparability of assessment methods if there is more than one group (p. 6-7 and Appendix) ✓                                                                                                                                                            |
| Bias                         | 9       | Describe any efforts to address potential sources of bias (p. 12-13) ✓                                                                                                                                                                                                                                                                                                  |
| Study size                   | 10      | Explain how the study size was arrived at. NOT APPLICABLE (all people included)                                                                                                                                                                                                                                                                                         |
| Quantitative variables       | 11      | Explain how quantitative variables were handled in the analyses. If applicable, describe which groupings were chosen and why (p. 8) ✓                                                                                                                                                                                                                                   |
| Statistical methods          | 12      | (a) Describe all statistical methods, including those used to control for confounding (p. 8) ✓<br>(b) Describe any methods used to examine subgroups and interactions (p. 8) ✓<br>(c) Explain how missing data were addressed N/A ✓<br>(d) If applicable, explain how loss to follow-up was addressed. NOT APPLICABLE<br>(e) Describe any sensitivity analyses (p. 8) ✓ |
| <b>Results</b>               |         |                                                                                                                                                                                                                                                                                                                                                                         |
| Participants                 | 13*     | (a) Report numbers of individuals at each stage of study—eg numbers potentially eligible, examined for eligibility, confirmed eligible, included in the study, completing follow-up, and analysed (p. 9) ✓<br>(b) Give reasons for non-participation at each stage. NOT APPLICABLE<br>(c) Consider use of a flow diagram (Figure 1) ✓                                   |
| Descriptive data             | 14*     | (a) Give characteristics of study participants (eg demographic, clinical, social) and information on exposures and potential confounders (p. 19, Table 1) ✓<br>(b) Indicate number of participants with missing data for each variable of interest. NA<br>(c) Summarise follow-up time (eg, average and total amount) (p. 6) ✓                                          |
| Outcome data                 | 15*     | Report numbers of outcome events or summary measures over time (p. 9) ✓                                                                                                                                                                                                                                                                                                 |
| Main results                 | 16      | (a) Give unadjusted estimates and, if applicable, confounder-adjusted estimates and                                                                                                                                                                                                                                                                                     |

|                          |    |                                                                                                                                                                                         |
|--------------------------|----|-----------------------------------------------------------------------------------------------------------------------------------------------------------------------------------------|
|                          |    | their precision (eg, 95% confidence interval). Make clear which confounders were adjusted for and why they were included (p. 19-23, Tables 1-5) ✓                                       |
|                          |    | (b) Report category boundaries when continuous variables were categorized (p.19,21,23, Tables 1,3,5) ✓                                                                                  |
|                          |    | (c) If relevant, consider translating estimates of relative risk into absolute risk for a meaningful time period NA                                                                     |
| Other analyses           | 17 | Report other analyses done—eg analyses of subgroups and interactions, and sensitivity analyses (p. 22-23; Tables 4-5) ✓                                                                 |
| <b>Discussion</b>        |    |                                                                                                                                                                                         |
| Key results              | 18 | Summarise key results with reference to study objectives (p. 13) ✓                                                                                                                      |
| Limitations              | 19 | Discuss limitations of the study, taking into account sources of potential bias or imprecision. Discuss both direction and magnitude of any potential bias (p. 10-13) ✓                 |
| Interpretation           | 20 | Give a cautious overall interpretation of results considering objectives, limitations, multiplicity of analyses, results from similar studies, and other relevant evidence (p. 10-13) ✓ |
| Generalisability         | 21 | Discuss the generalisability (external validity) of the study results (p. 13) ✓                                                                                                         |
| <b>Other information</b> |    |                                                                                                                                                                                         |
| Funding                  | 22 | Give the source of funding and the role of the funders for the present study and, if applicable, for the original study on which the present article is based (p. 14) ✓                 |

\*Give information separately for exposed and unexposed groups.

**Note:** An Explanation and Elaboration article discusses each checklist item and gives methodological background and published examples of transparent reporting. The STROBE checklist is best used in conjunction with this article (freely available on the Web sites of PLoS Medicine at <http://www.plosmedicine.org/>, Annals of Internal Medicine at <http://www.annals.org/>, and Epidemiology at <http://www.epidem.com/>). Information on the STROBE Initiative is available at <http://www.strobe-statement.org>.
