# Supplementary material for: Influence of prior comorbidities and chronic medications use on the risk of COVID-19 in adults: a population-based cohort study in Tarragona, Spain
Source: PubMed Central journal article supplement — BMJ Open. 2020 Dec 10;10(12):e041577. doi: 10.1136/bmjopen-2020-041577 (PMC7733229; doi:10.1136/bmjopen-2020-041577), 2020-12-10
Supplement: bmjopen-2020-041577supp001.pdf [file bmjopen-2020-041577supp001.pdf]

**APPENDIX. Criteria used to identify comorbidities and active medications in the study population.**

| Comorbidities and underlying conditions with ICD-10 codes [International Classification of Diseases, 10th Revision]                                                   |                                                          |
|-----------------------------------------------------------------------------------------------------------------------------------------------------------------------|----------------------------------------------------------|
| <b>Neurological disease:</b><br>Dementia<br>Ictus                                                                                                                     | F01-F03<br>I63, I61                                      |
| <b>Chronic renal failure</b>                                                                                                                                          | N18-N19                                                  |
| <b>Cancer</b> (solid organ or haematological neoplasia) in past 5 years                                                                                               | C00-C97                                                  |
| <b>Rheumatologic disease:</b><br>Rheumatoid arthritis, enteropathic arthropathies and juvenile arthritis<br>Systemic lupus erythematosus                              | M05-M09<br>M32                                           |
| <b>Chronic pulmonary/respiratory disease:</b><br>Chronic bronchitis/emphysema<br>Asthma<br>Other chronic pulmonary diseases                                           | J41-J44<br>J45-J46<br>P27, E84, J47                      |
| <b>Chronic heart disease:</b><br>Congestive heart failure<br>Coronary artery disease<br>Other chronic heart diseases                                                  | I50<br>I20-I22, I25<br>I05-I08, I11, I35-I37, I42, I51.7 |
| <b>Atrial Fibrillation</b>                                                                                                                                            | I48                                                      |
| <b>Chronic liver disease:</b><br>Chronic viral hepatitis<br>Cirrhosis<br>Alcoholic hepatitis                                                                          | B18<br>K74<br>K70                                        |
| <b>Diabetes mellitus</b>                                                                                                                                              | E10-E14                                                  |
| <b>Hypertension</b>                                                                                                                                                   | I10, I11, I12 o I15                                      |
| <b>Hypercholesterolemia</b>                                                                                                                                           | E78                                                      |
| <b>Obesity</b>                                                                                                                                                        | E66                                                      |
| <b>Smoking</b>                                                                                                                                                        | F17                                                      |
| Drugs identified in the patient treatment with codes of the Anatomical, Therapeutic, and Chemical classification system (ATC codes) of the World Health Organization: |                                                          |
| <b>Diuretics</b>                                                                                                                                                      | C03                                                      |
| <b>Beta blockers</b>                                                                                                                                                  | C07                                                      |
| <b>Angiotensin converter enzyme inhibitors (ACEIs)</b>                                                                                                                | C09A, C09B                                               |
| <b>Angiotensin II receptor blockers (ARBs)</b>                                                                                                                        | C09C, C09D                                               |
| <b>Calcium channel blockers</b>                                                                                                                                       | C08CA                                                    |
| <b>Statins</b>                                                                                                                                                        | C10AA                                                    |
| <b>Oral anticoagulant drugs</b>                                                                                                                                       | B01AA, B01AE, B01AF                                      |
| <b>Antiplatelet drugs</b>                                                                                                                                             | B01AC                                                    |
| <b>Insulin</b>                                                                                                                                                        | A10A                                                     |
| <b>Oral antidiabetic drugs</b>                                                                                                                                        | A10B                                                     |
| <b>Inhaled respiratory drugs</b>                                                                                                                                      | R03A, R03B                                               |
| <b>Antineoplastic agents</b>                                                                                                                                          | L01, L02B, L03, L04                                      |
| <b>Corticosteroids for systemic use</b>                                                                                                                               | H02A                                                     |
| <b>Non-steroids anti inflammatory drugs (NSADs)</b>                                                                                                                   | M01A                                                     |
| <b>Chloroquine/Hydroxychloroquine</b>                                                                                                                                 | P01BA01, P01BA02                                         |
| <b>Antihistamines for systemic use</b>                                                                                                                                | R06                                                      |
| <b>Proton pump inhibitors</b>                                                                                                                                         | A02BC                                                    |
| <b>Benzodiazepines</b>                                                                                                                                                | N05BA, N05CD, N05CF                                      |
